# Supplementary material for: Ruthenium-catalyzed C–H functionalization of indoles and indolines with 7-azabenzonorbornadienes: access to aminodihydronaphthyl indoles and indolines
Source: Royal Society of Chemistry journal article supplement (doi:10.1039/d4ob00678j), 2024-01-01

Electronic Supplementary Information

## Ruthenium-catalyzed C–H functionalization of indoles and indolines with 7-azabenzonorbornadienes: access to aminodihydronaphthyl indoles and indolines

Jia-Zhen Chen and Zhong-Xia Wang\*

CAS Key Laboratory of Soft Matter Chemistry and Department of Chemistry, University of Science and Technology of China, Hefei, Anhui 230026, P. R. China. Email: zxiwang@ustc.edu.cn.

### Contents

|                                                                                                |     |
|------------------------------------------------------------------------------------------------|-----|
| NMR spectral copies of unreported reactants                                                    | S2  |
| NMR spectral copies of the coupling products                                                   | S5  |
| NMR spectral copies of compound <b>6</b> (through reaction of <b>3a</b> with KOH)              | S46 |
| <sup>1</sup> H NMR spectral copy of compound <b>6</b> (through reaction of <b>3a</b> with HCl) | S47 |
| Kinetic Isotope Effect (KIE) experiment                                                        | S48 |
| HRMS copy of intermediate <b>I</b>                                                             | S49 |

## NMR spectral copies of unreported reactants

### (1) 4-(benzyloxy)-*N,N*-dimethyl-1*H*-indole-1-carboxamide (**1d**)

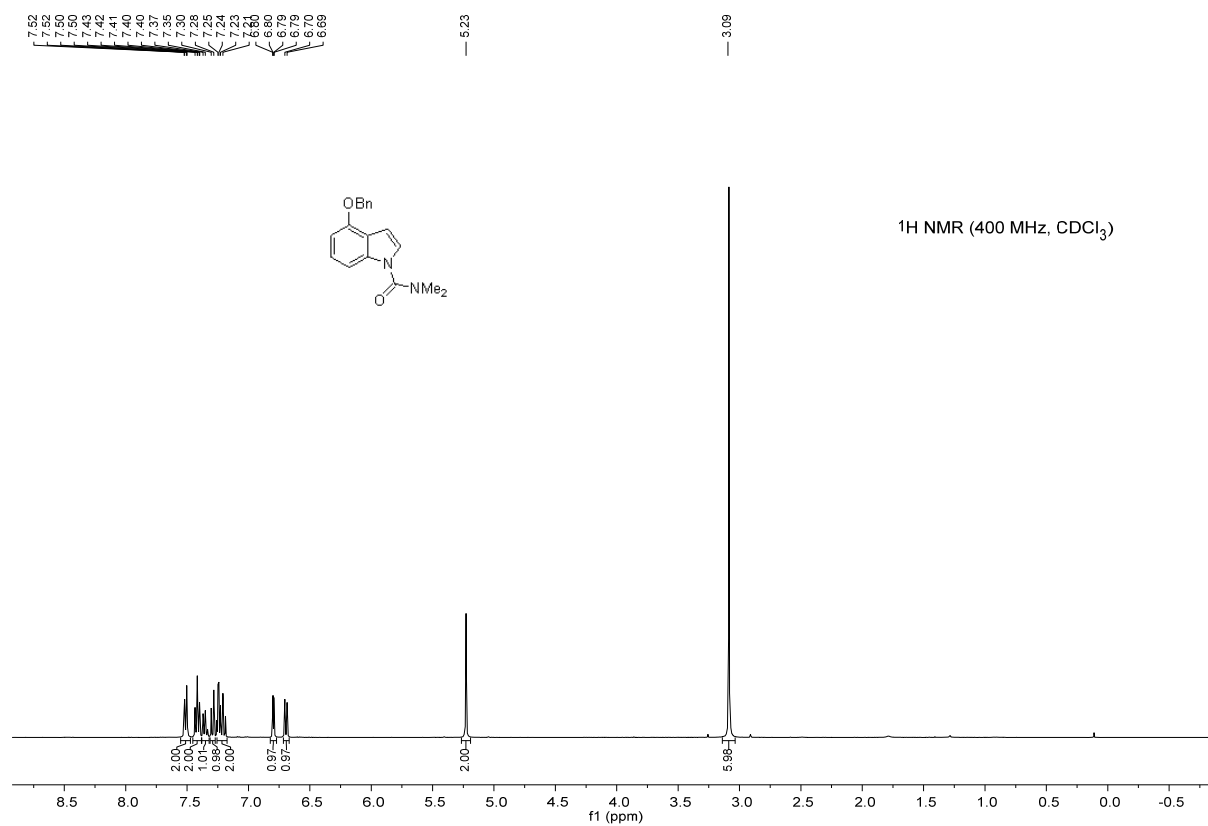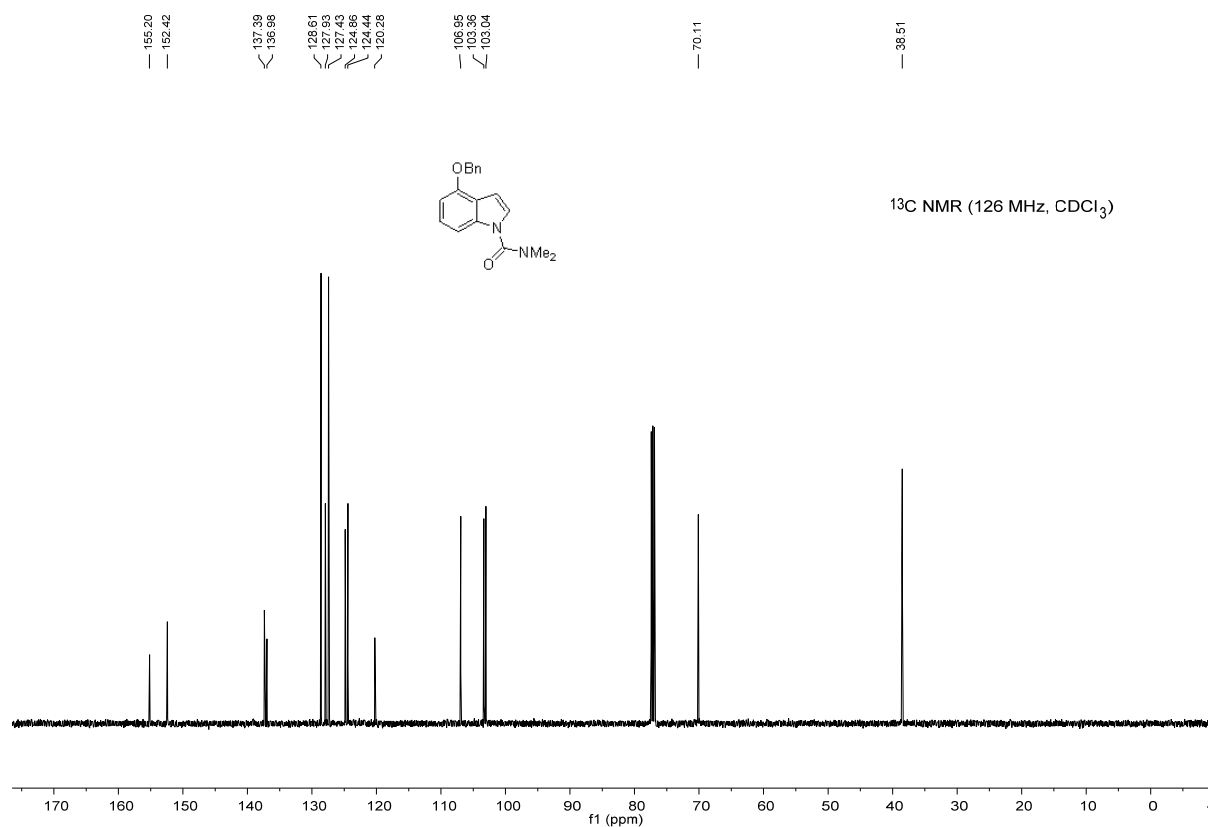

(2) 5-(benzyloxy)-N,N-dimethylindoline-1-carboxamide (**1j**)

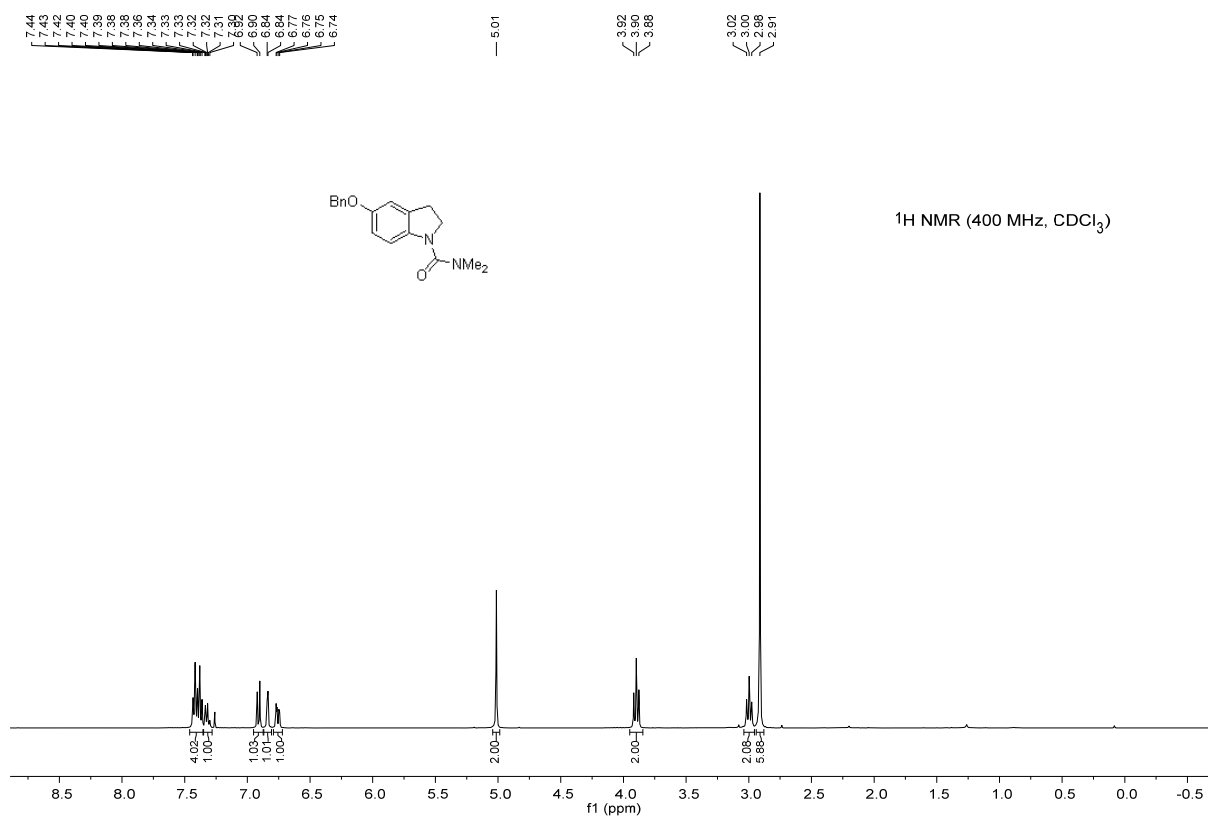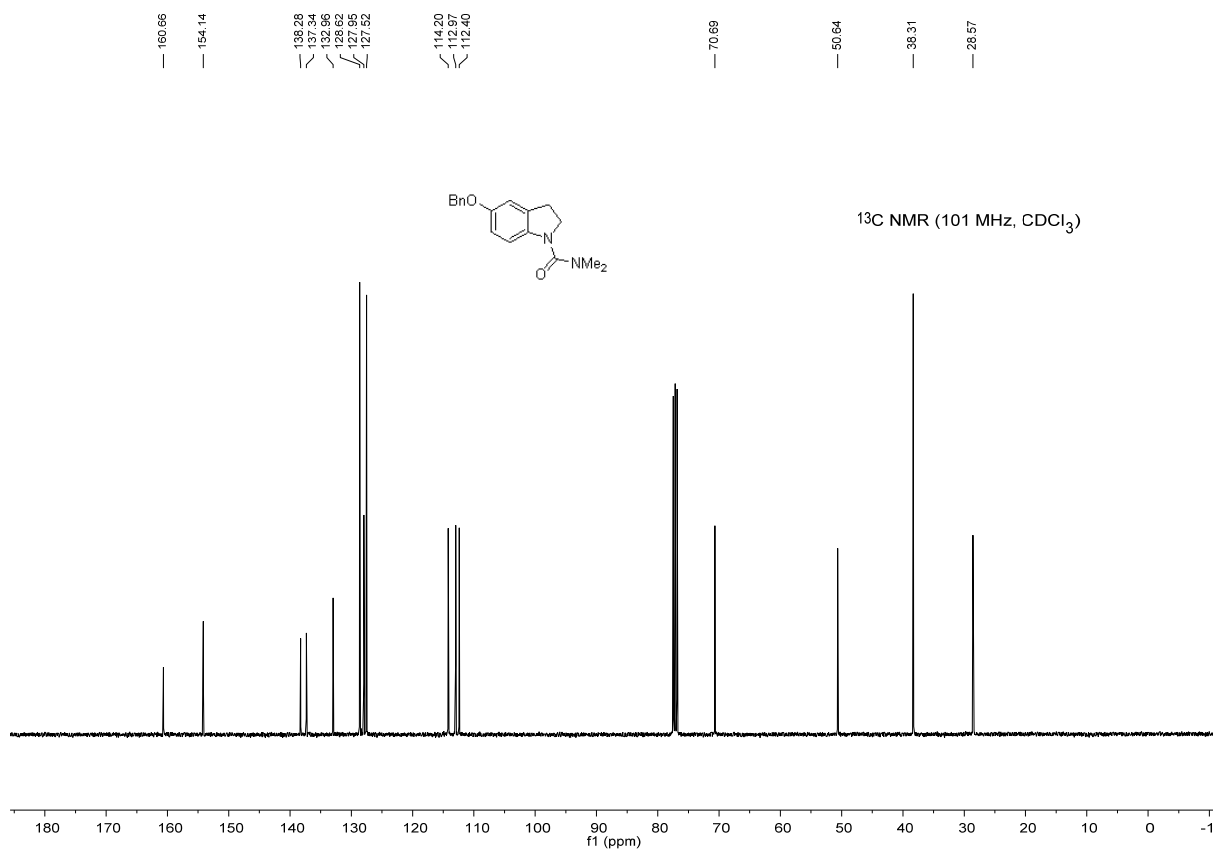

(3) 5-iodo-N,N-dimethyl-1*H*-indole-1-carboxamide (**1n**)

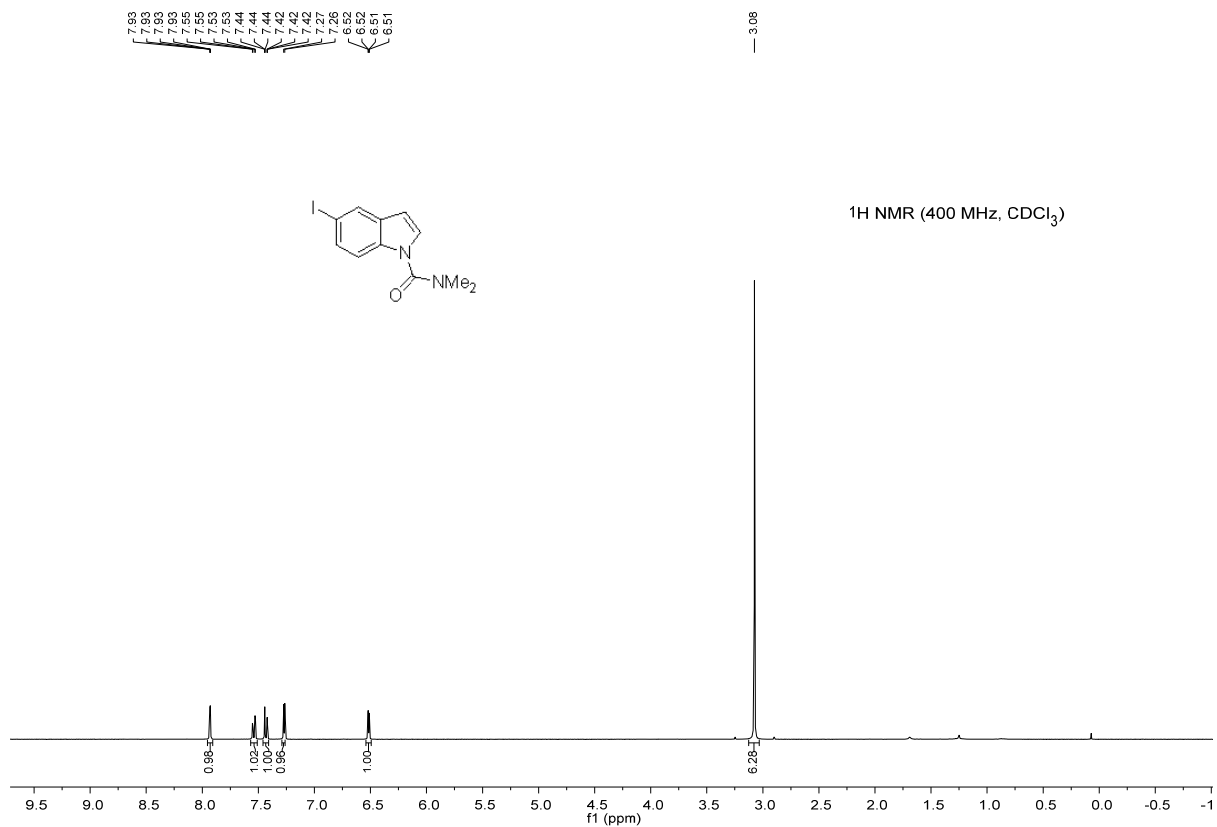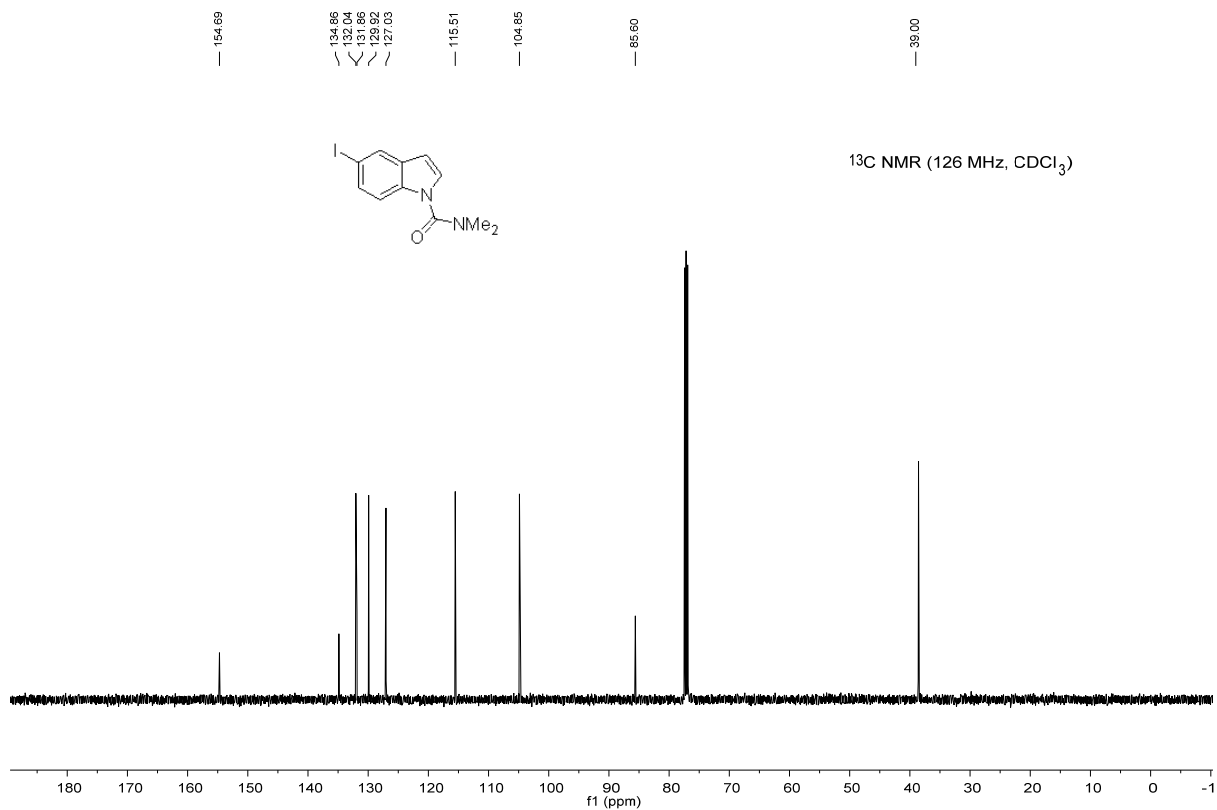

## NMR spectral copies of the coupling products

(1) *tert*-butyl (2-(1-(dimethylcarbamoyl)-1H-indol-2-yl)-1,2-dihydronaphthalen-1-yl)carbamate (**3a**)

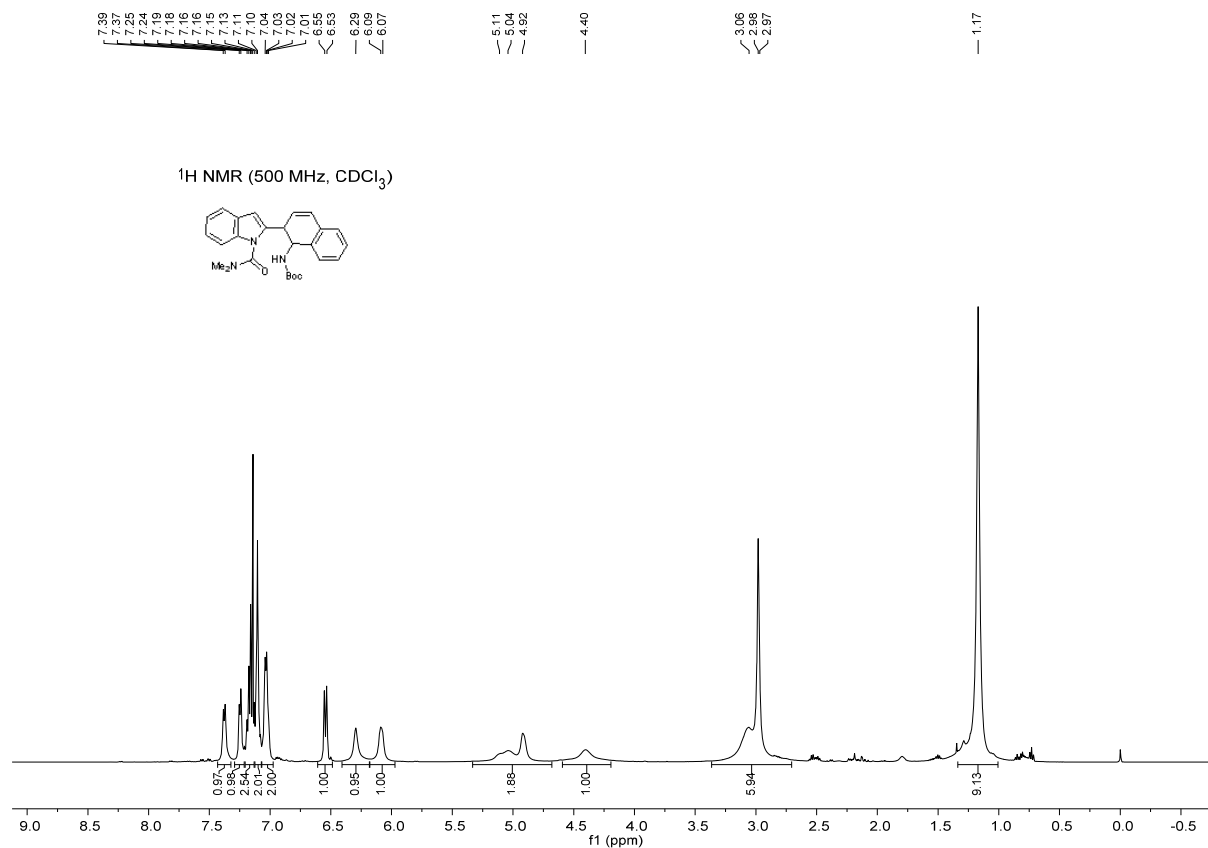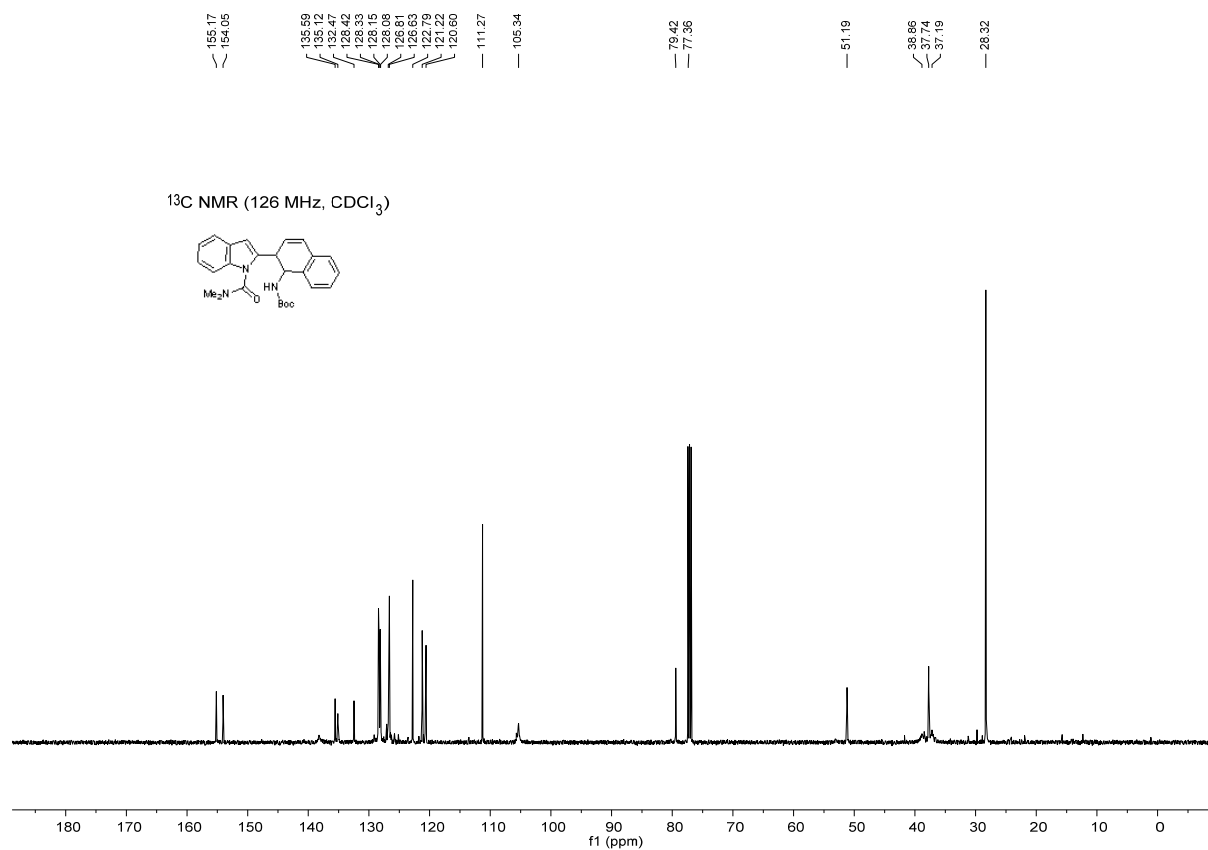

(2) *tert*-butyl (2-(1-(dimethylcarbamoyl)-4-methyl-1*H*-indol-2-yl)-1,2-dihydronaphthalen-1-yl)carbamate

(3b)

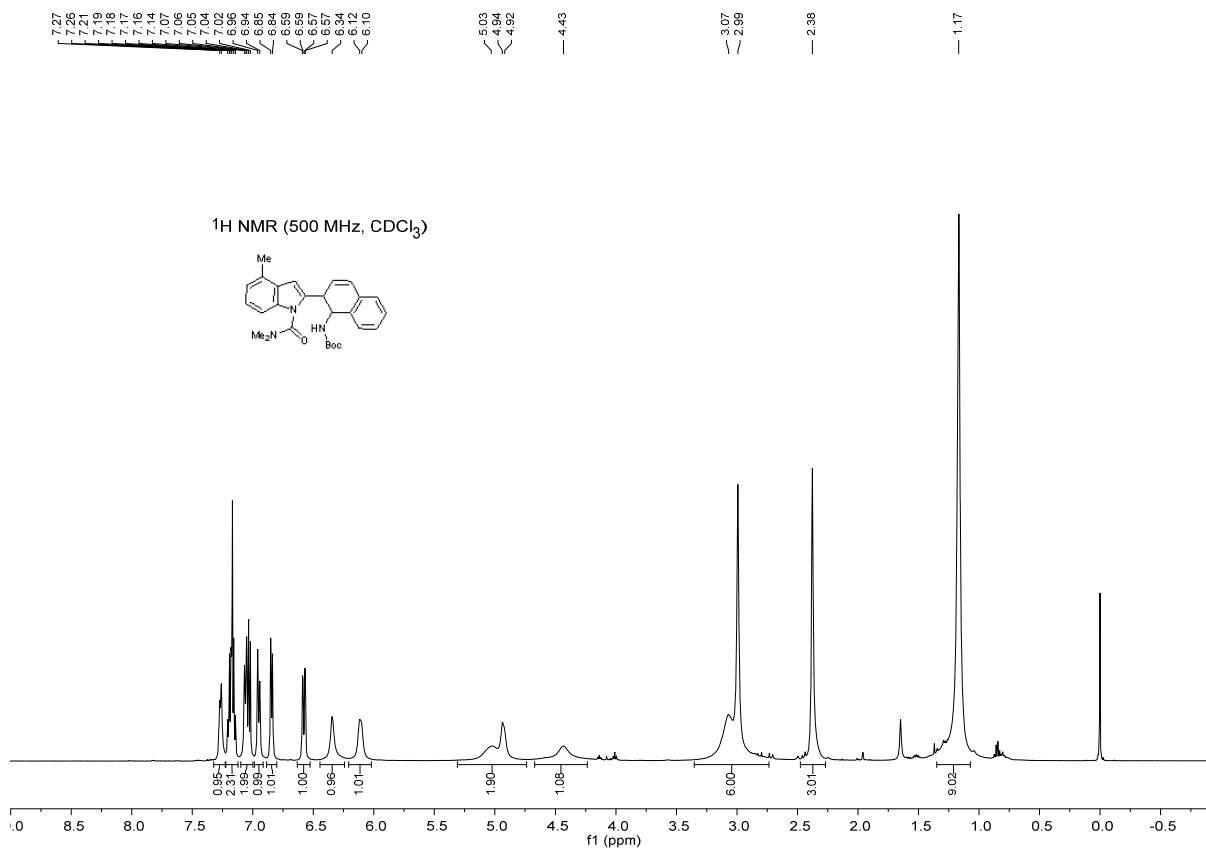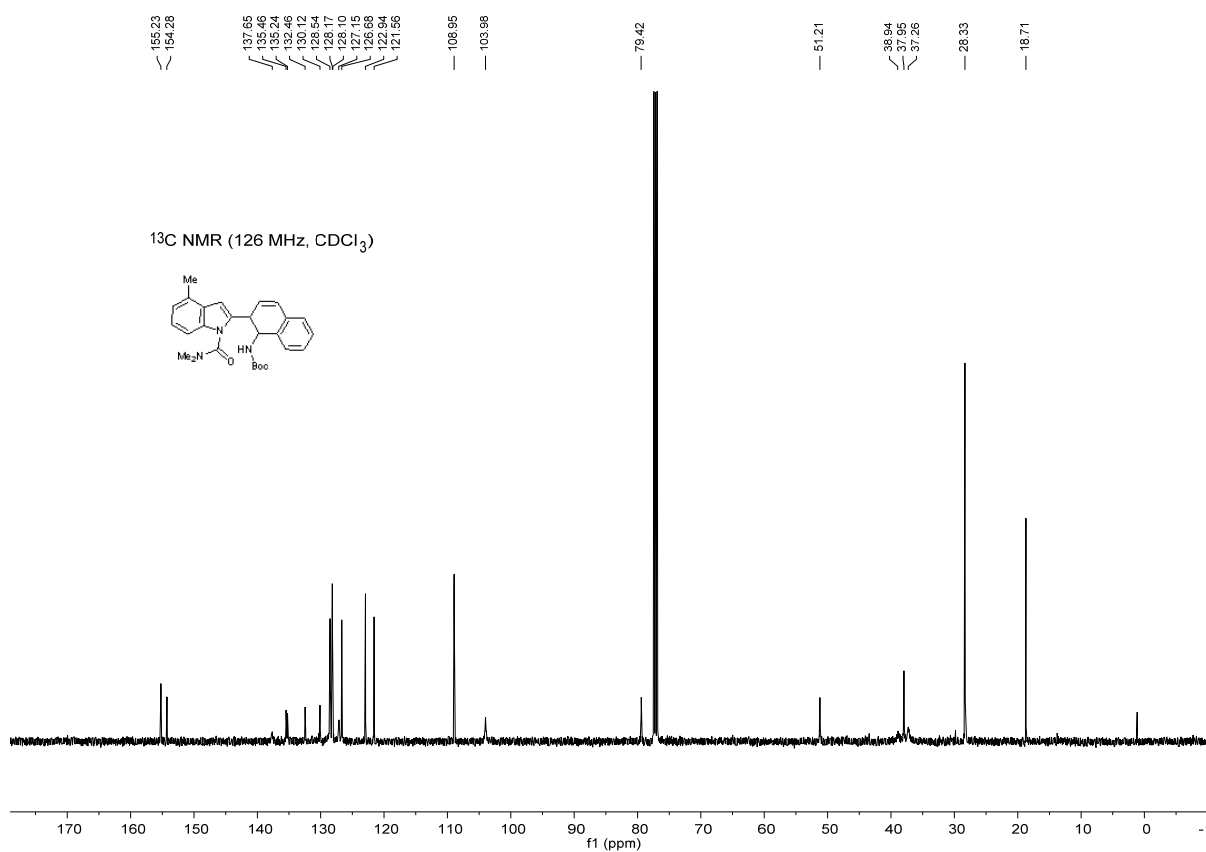

(3) *tert*-butyl(2-(1-(dimethylcarbamoyl)-4-methoxy-1*H*-indol-2-yl)-1,2-dihydronaphthalen-1-yl)carbamate  
**(3c)**

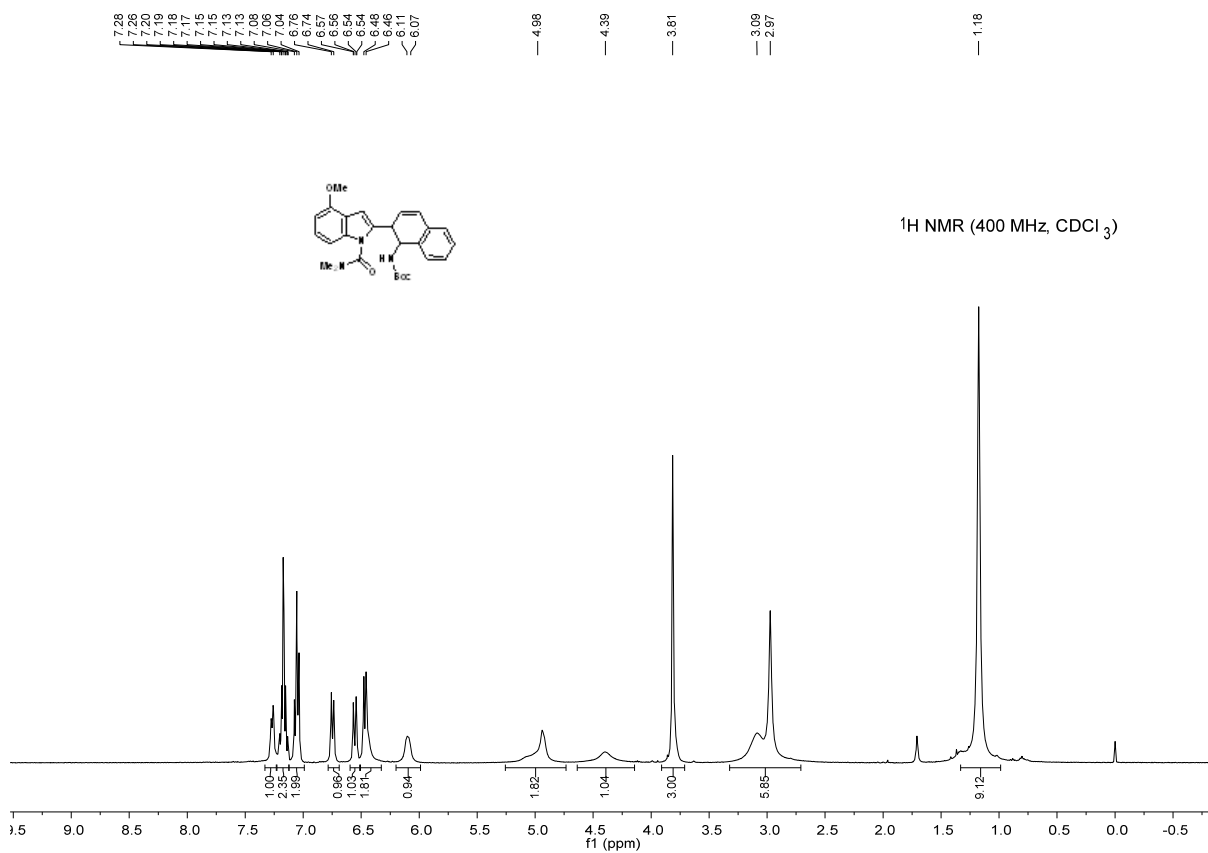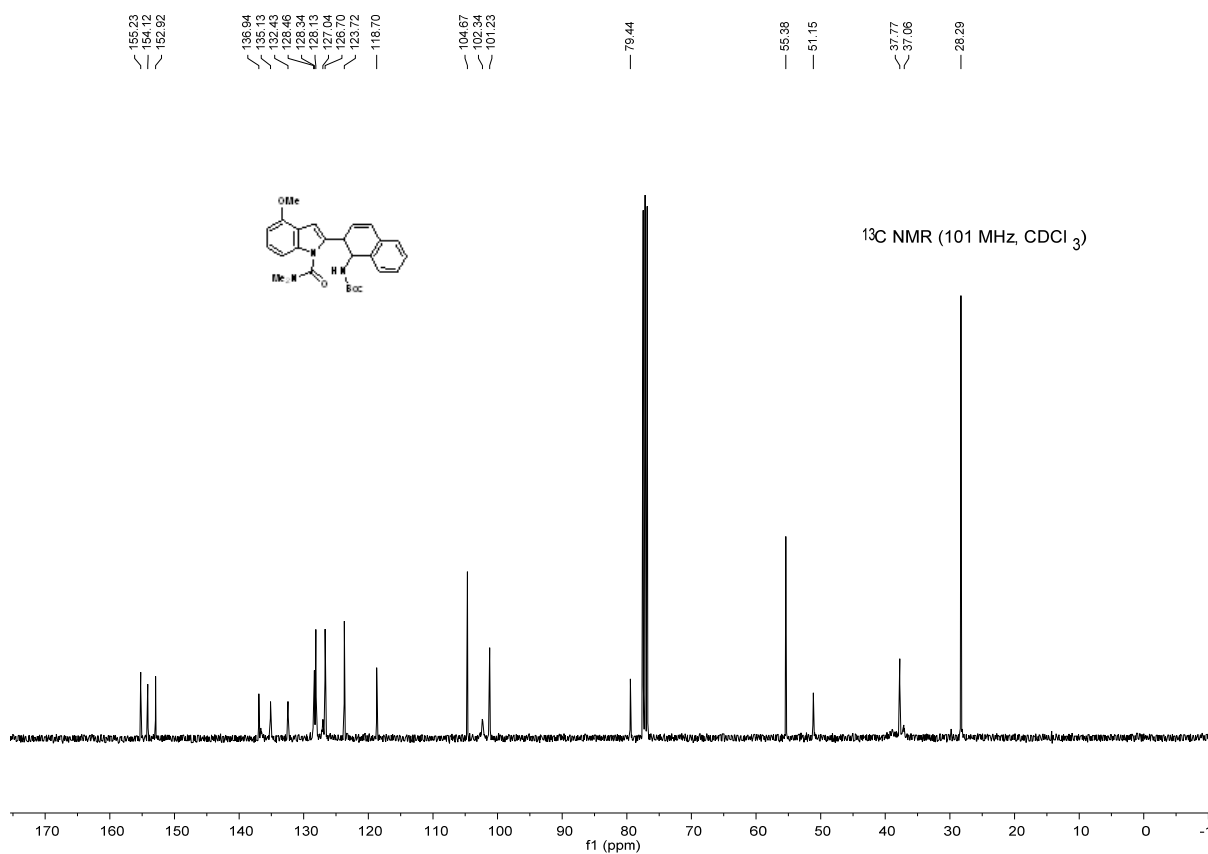

(4) *tert*-butyl (2-(4-(benzyloxy)-1-(dimethylcarbamoyl)-1*H*-indol-2-yl)-1,2-dihydronaphthalen-1-yl)carbamate (**3d**)

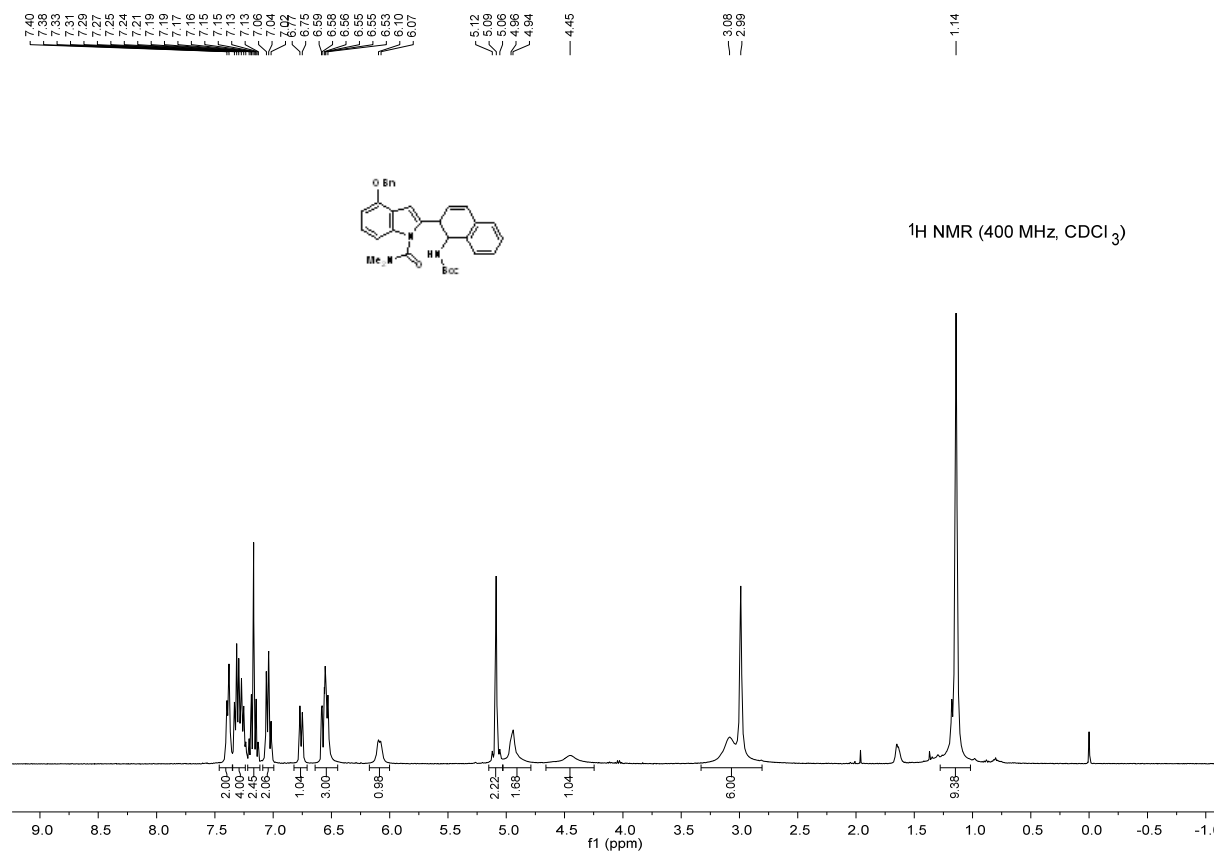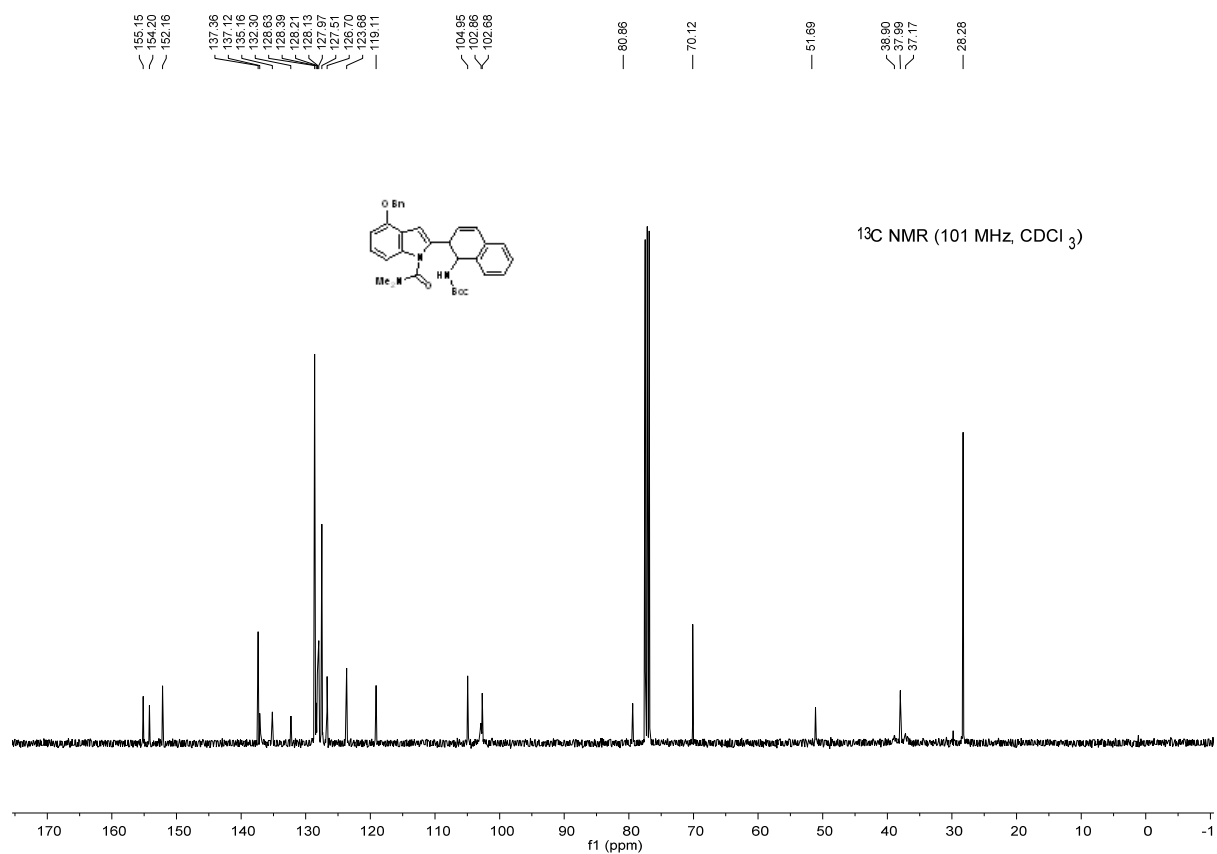



(5) *tert*-butyl (2-(1-(dimethylcarbamoyl)-4-fluoro-1*H*-indol-2-yl)-1,2-dihydronaphthalen-1-yl)carbamate  
**(3e)**

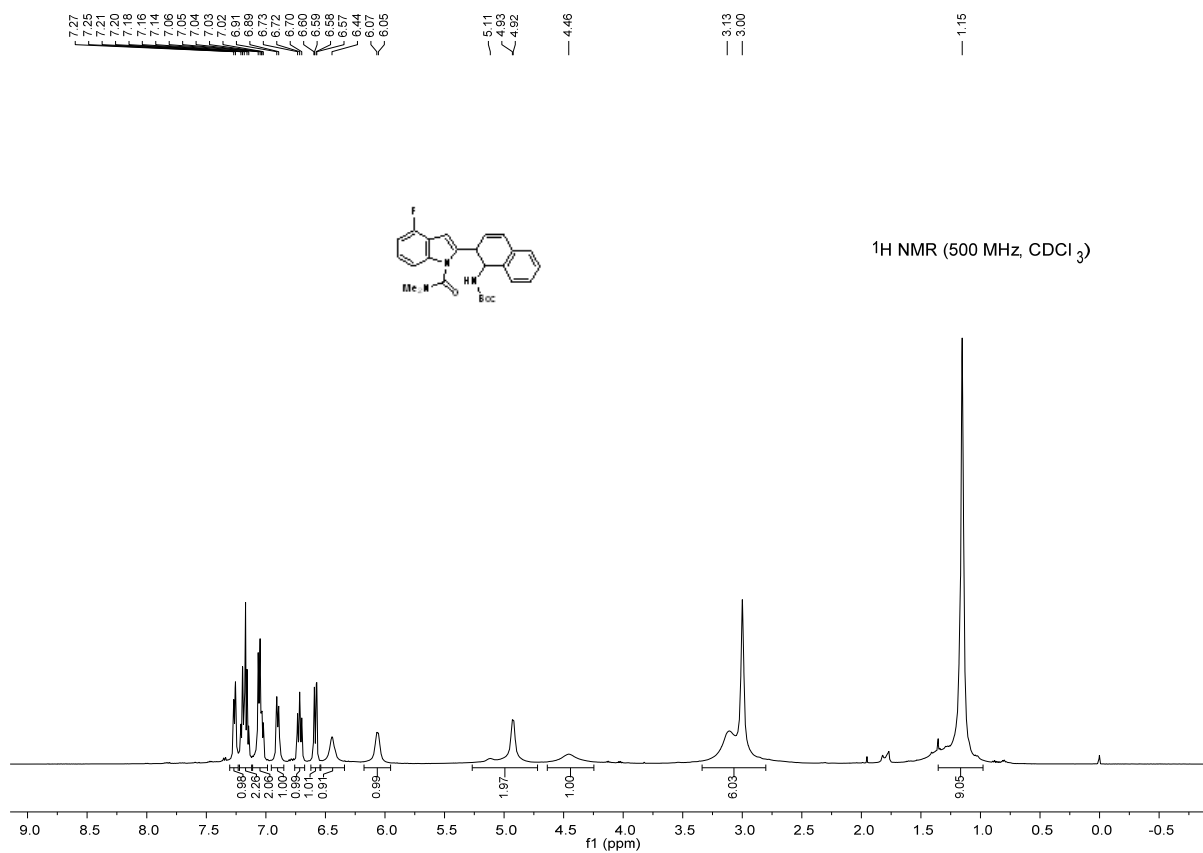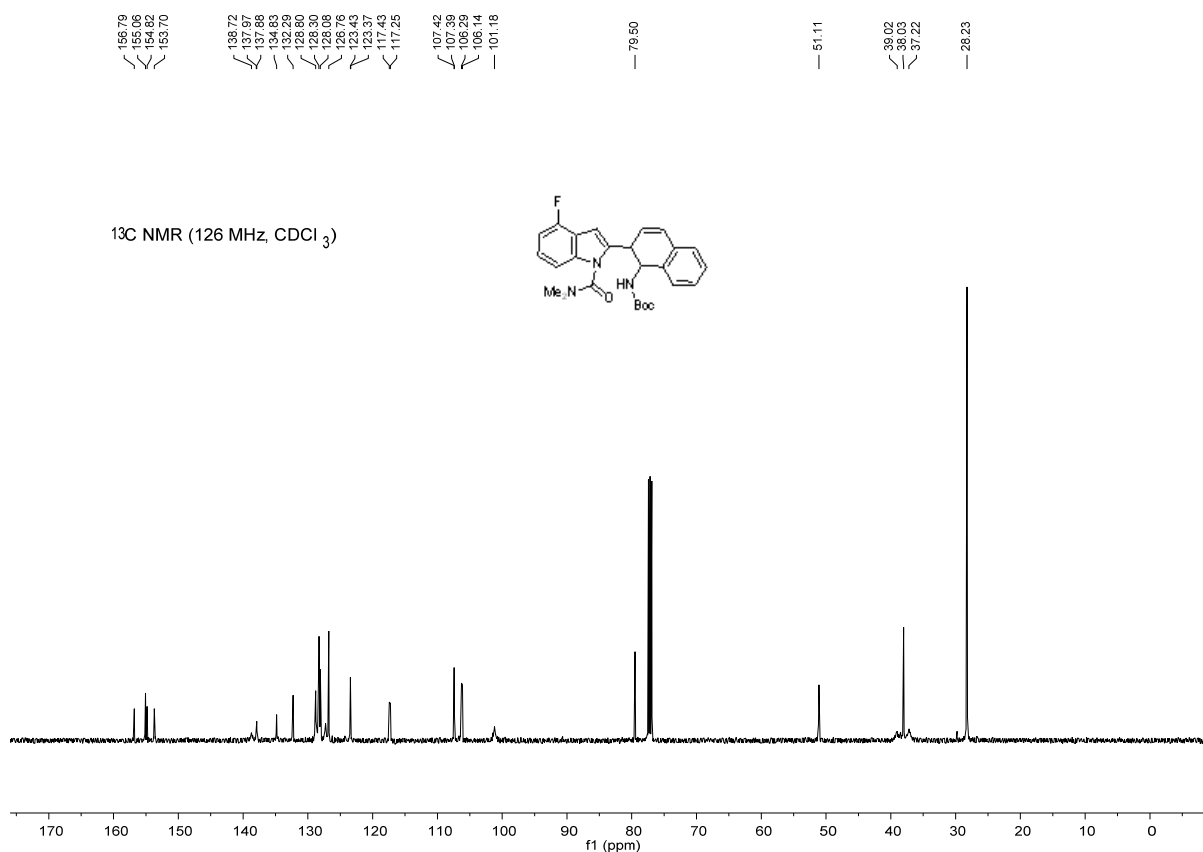

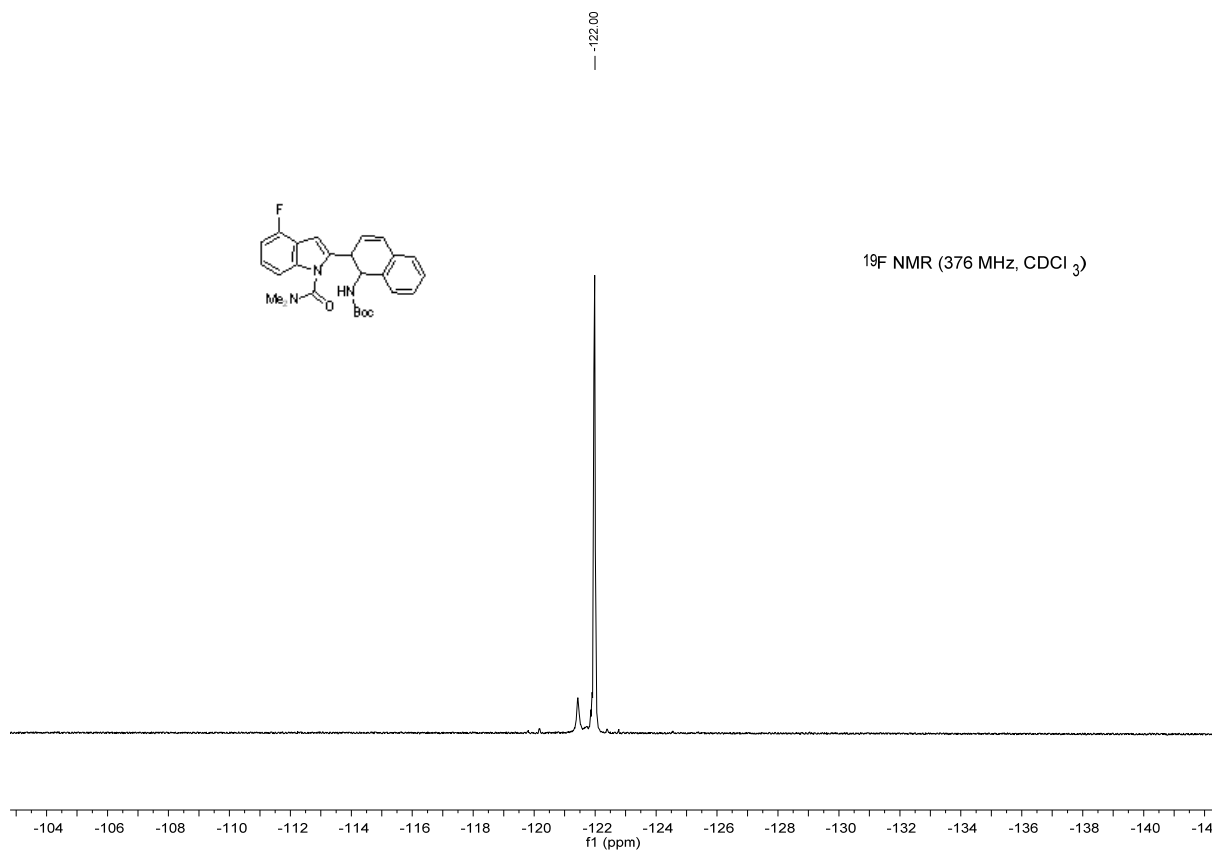

(6) *tert*-butyl (2-(4-chloro-1-(dimethylcarbamoyl)-1*H*-indol-2-yl)-1,2-dihydronaphthalen-1-yl)carbamate  
**(3f)**

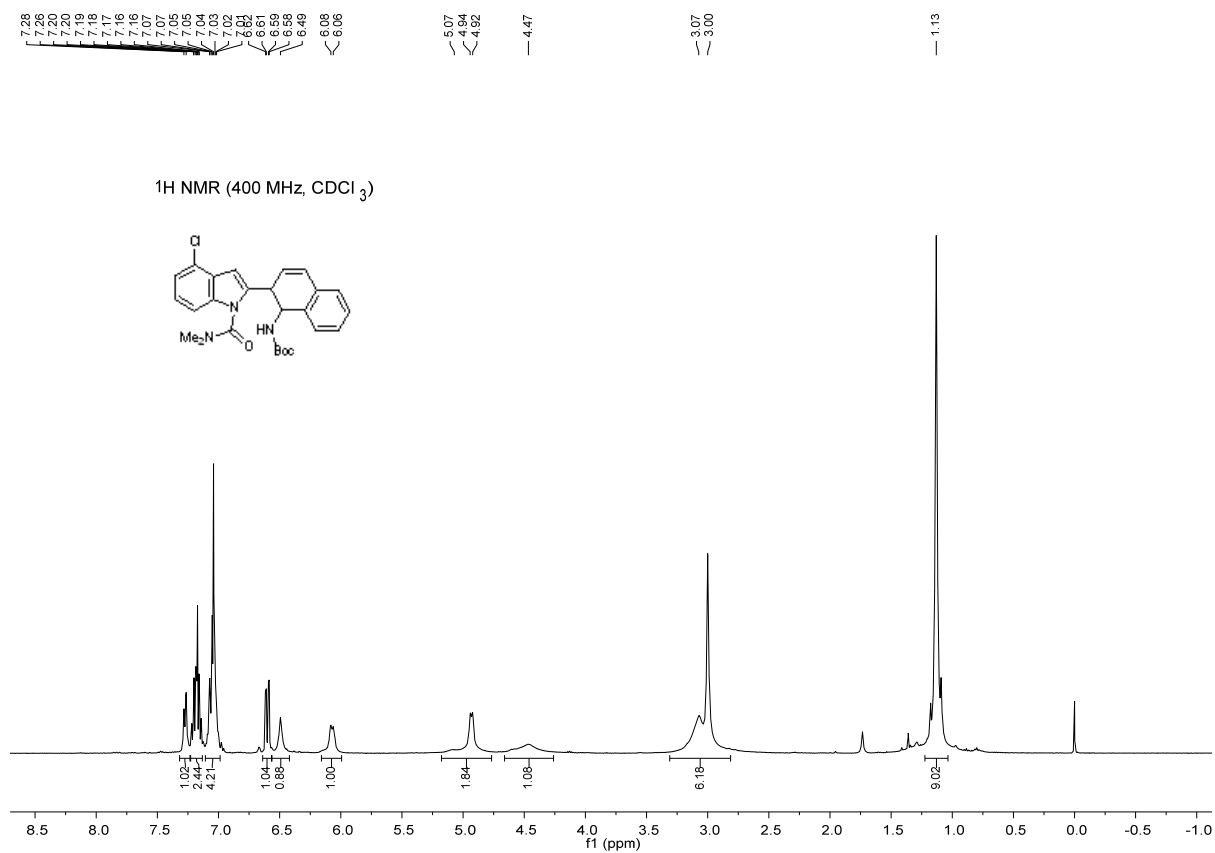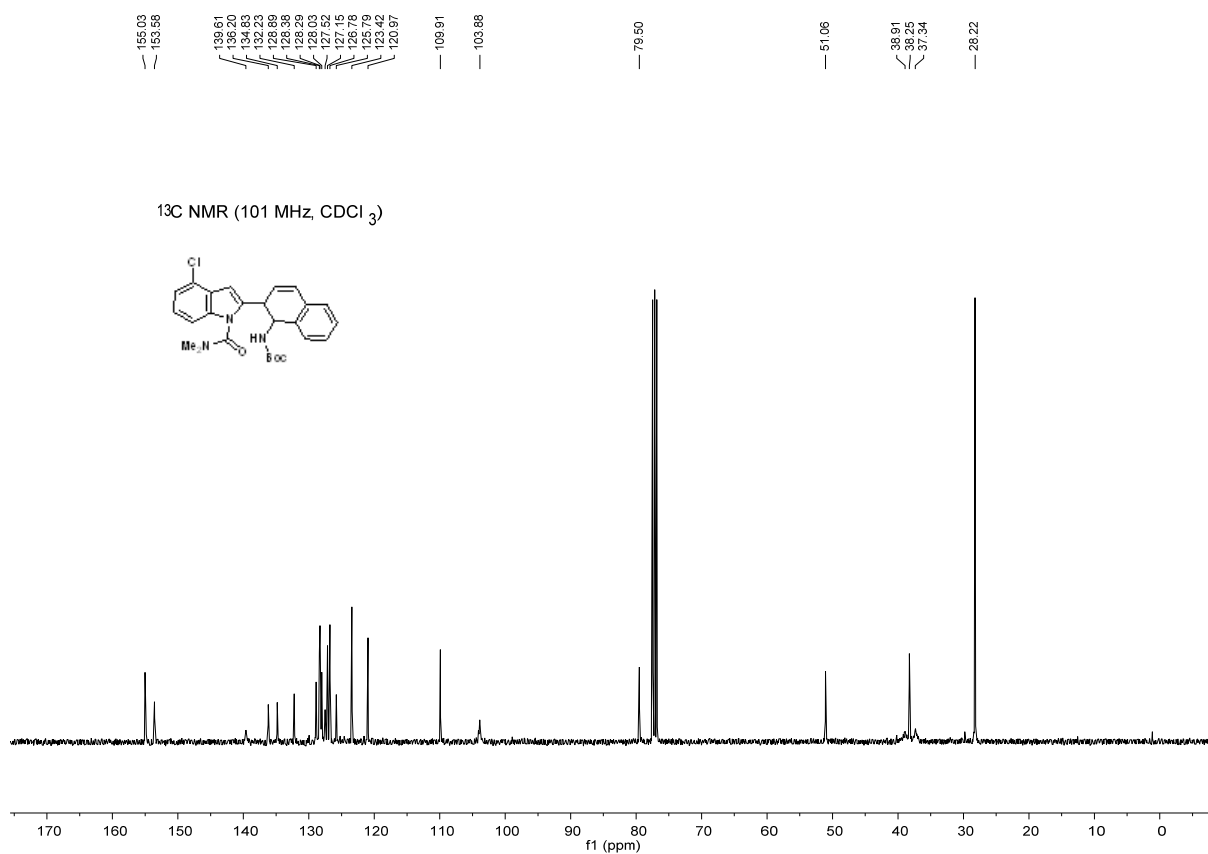

(7) *tert*-butyl (2-(4-bromo-1-(dimethylcarbamoyl)-1*H*-indol-2-yl)-1,2-dihydronaphthalen-1-yl)carbamate  
**(3g)**

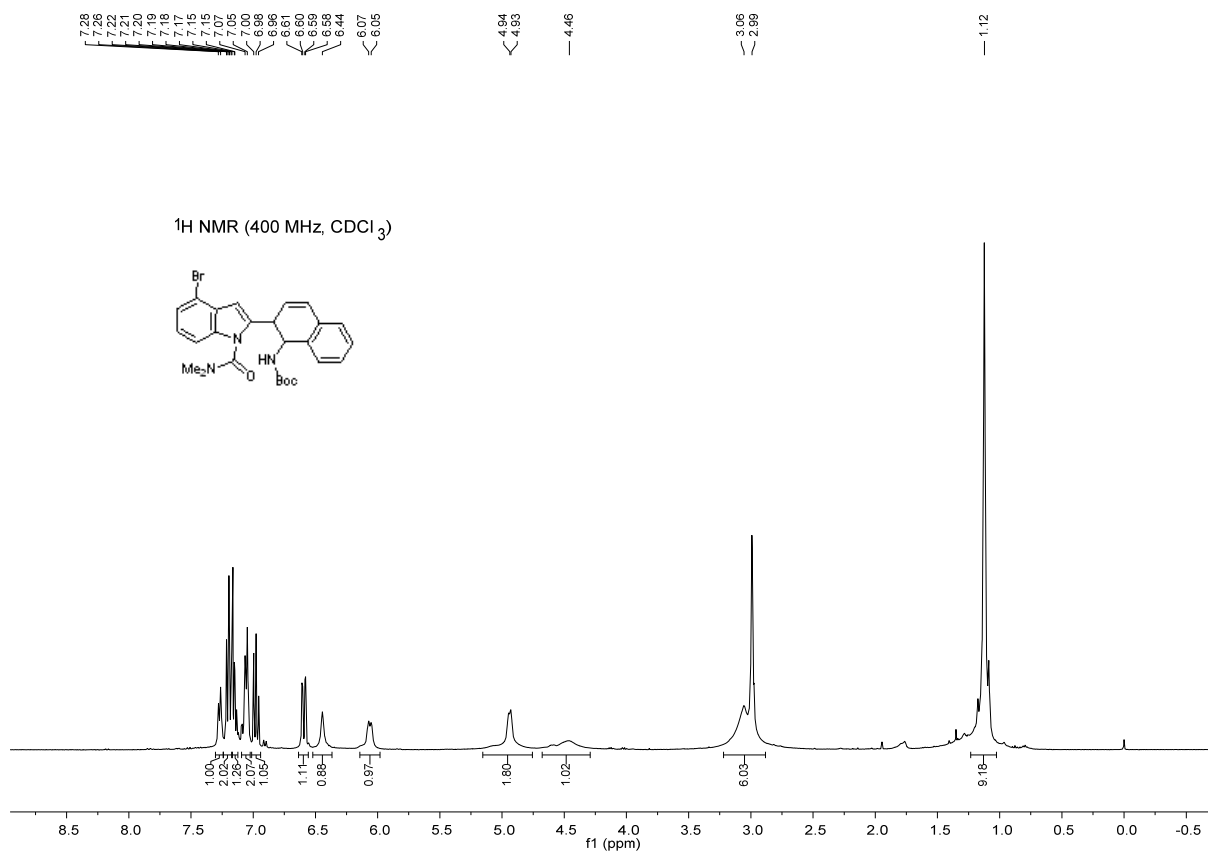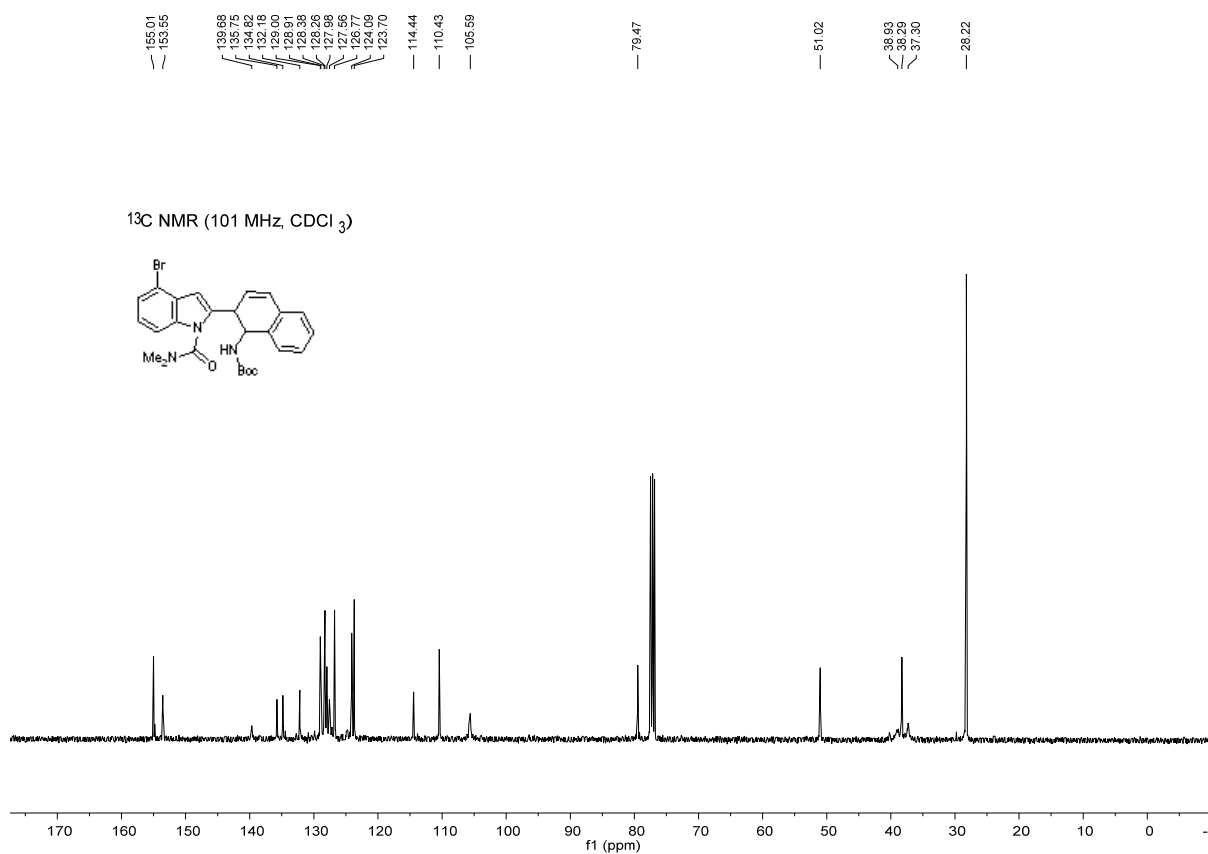

(8) *tert*-butyl (2-(1-(dimethylcarbamoyl)-5-methyl-1*H*-indol-2-yl)-1,2-dihydronaphthalen-1-yl)carbamate  
**(3h)**

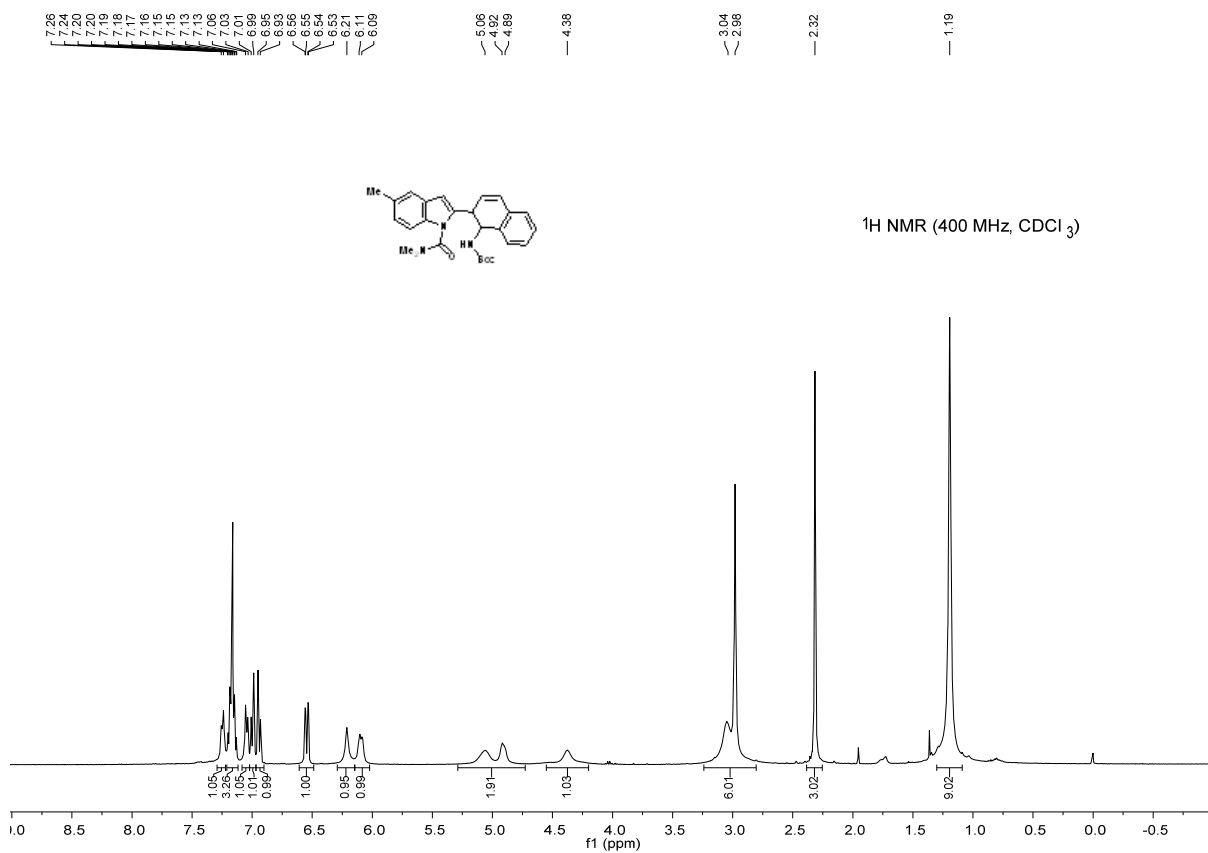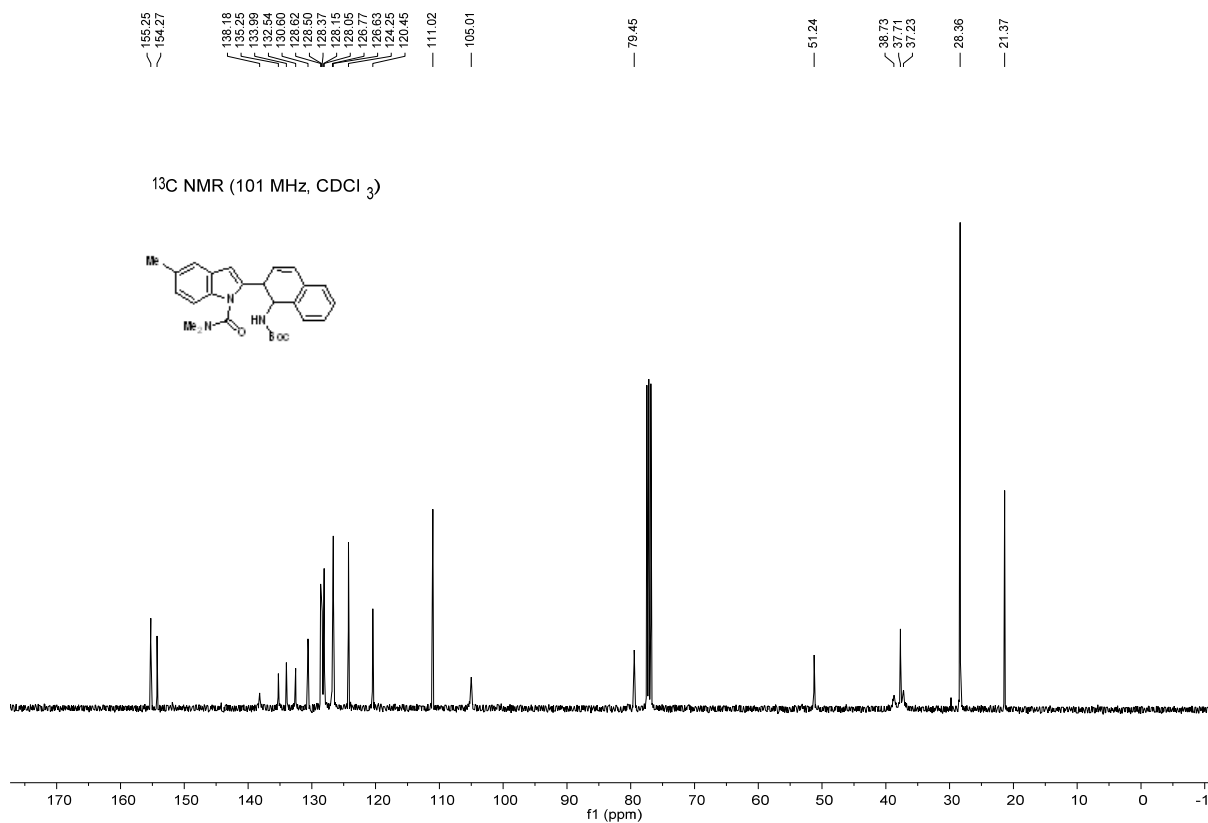

(9) *tert*-butyl (2-(1-(dimethylcarbamoyl)-5-methoxy-1*H*-indol-2-yl)-1,2-dihydronaphthalen-1-yl)carbamate  
**(3i)**

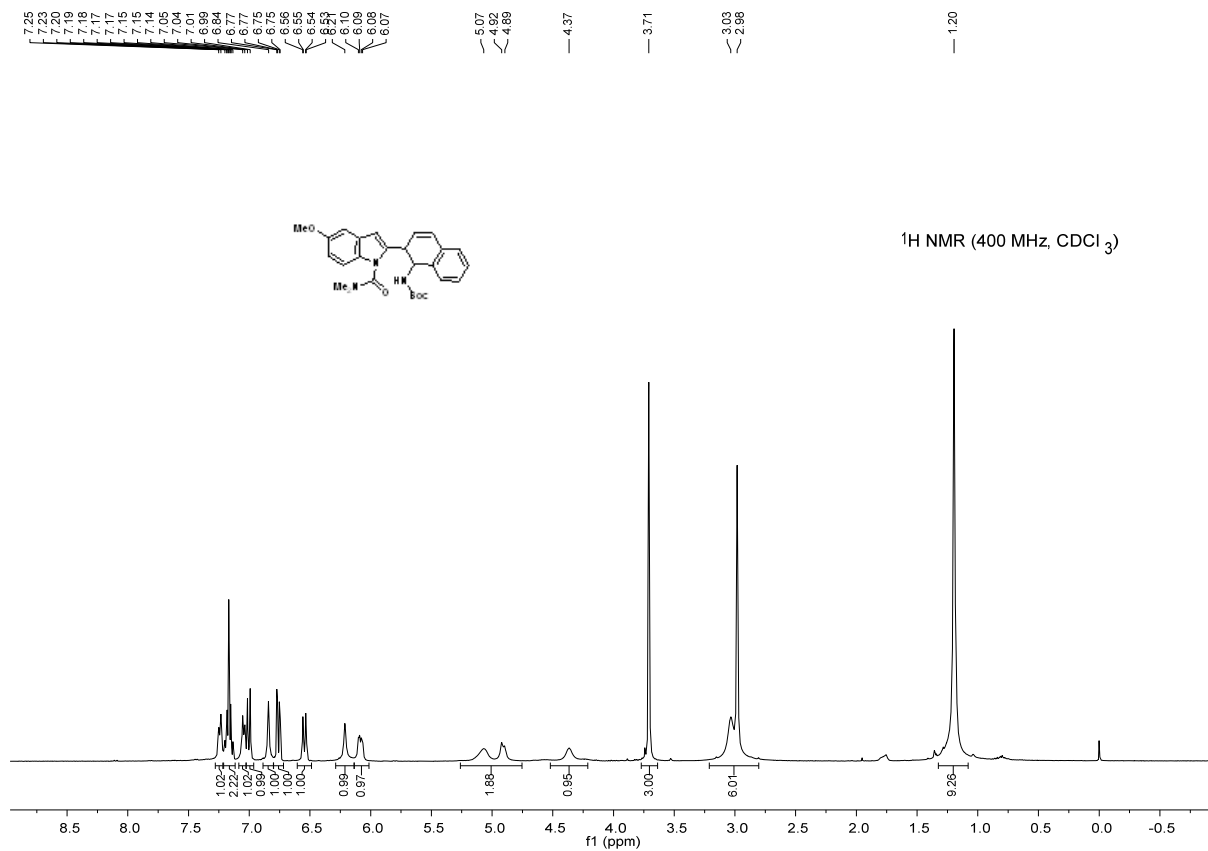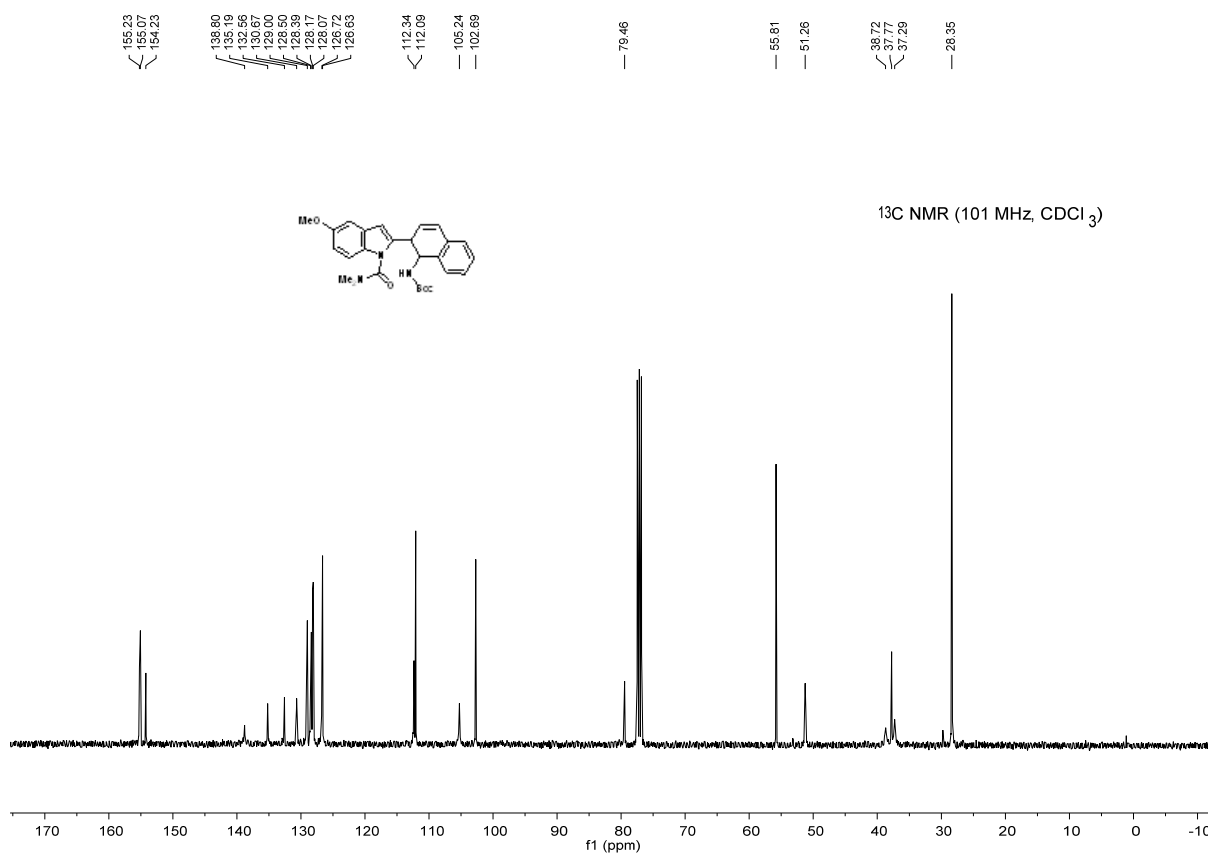

(10) *tert*-butyl (2-(5-(benzyloxy)-1-(dimethylcarbamoyl)-1*H*-indol-2-yl)-1,2-dihydronaphthalen-1-yl) carbamate (**3j**)

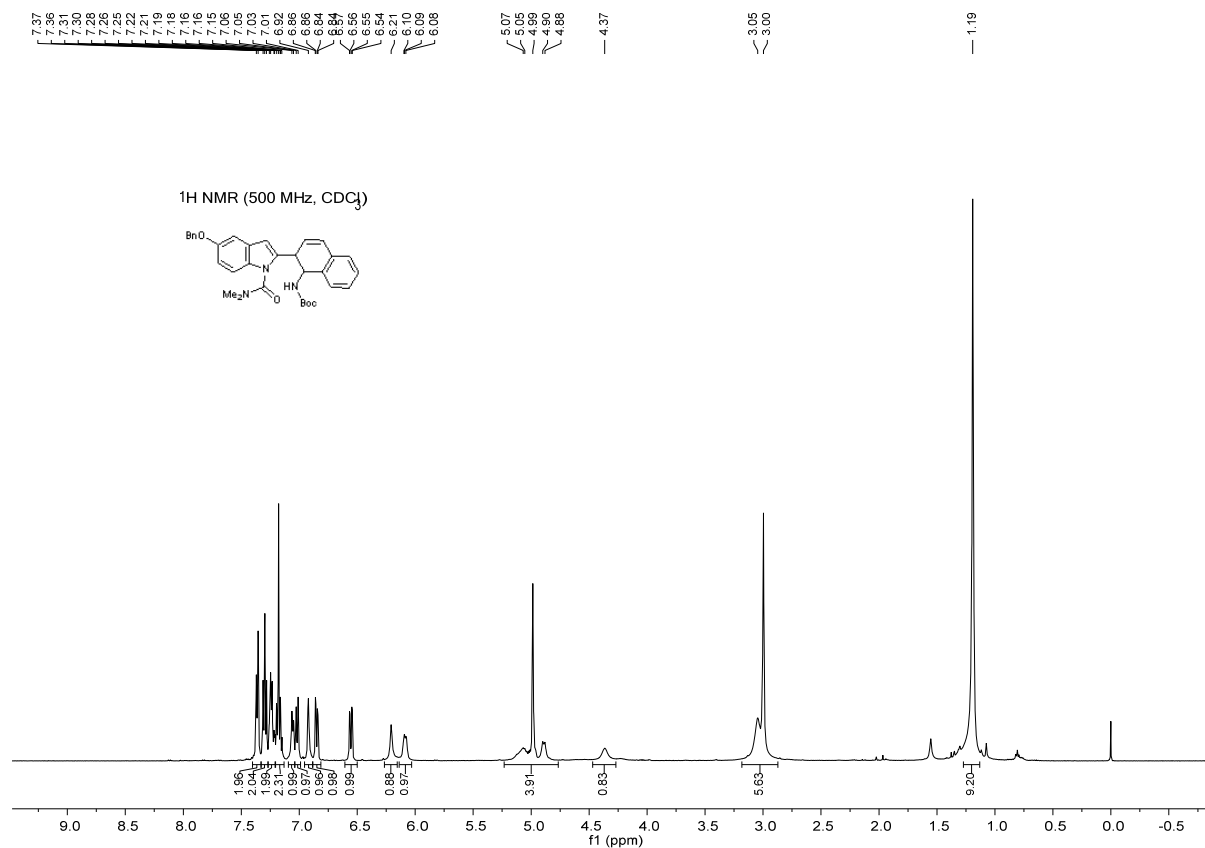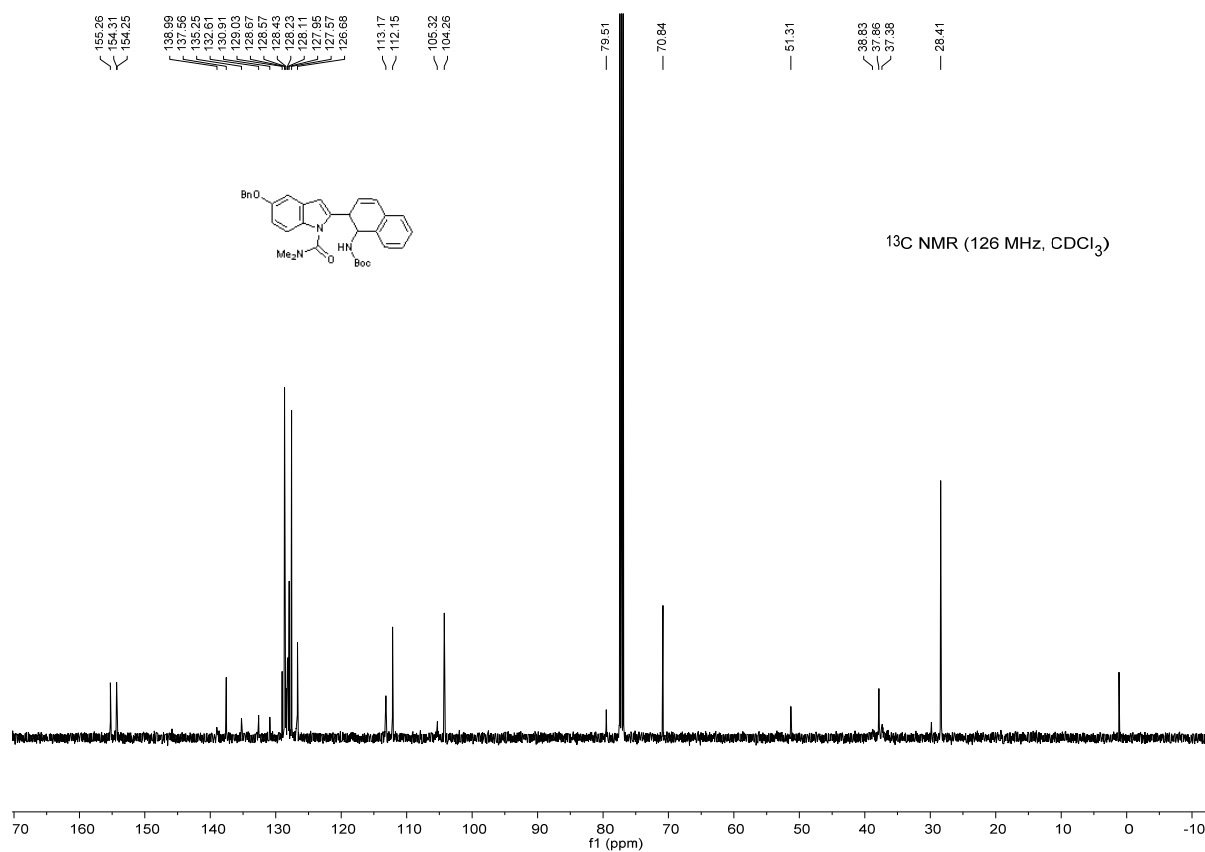

(10) *tert*-butyl (2-(1-(dimethylcarbamoyl)-5-fluoro-1*H*-indol-2-yl)-1,2-dihydronaphthalen-1-yl)carbamate  
**(3k)**

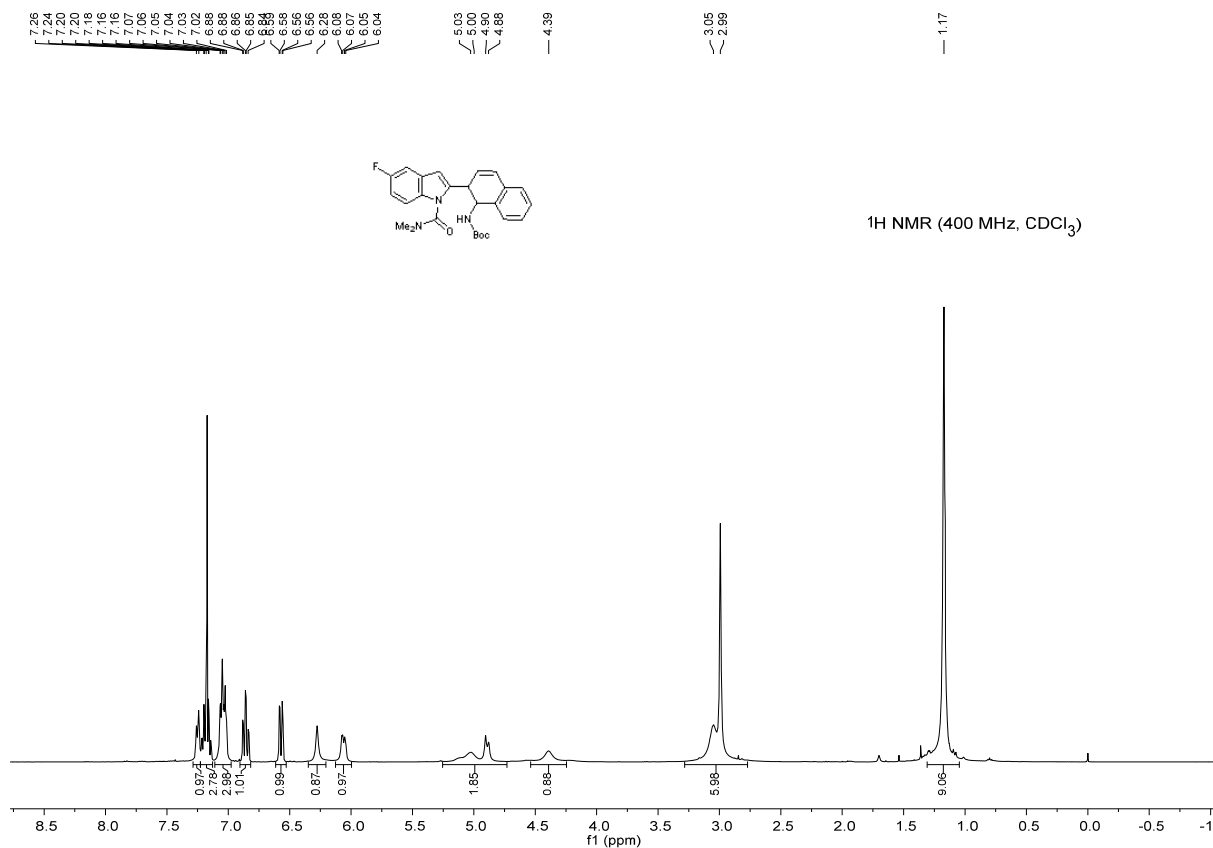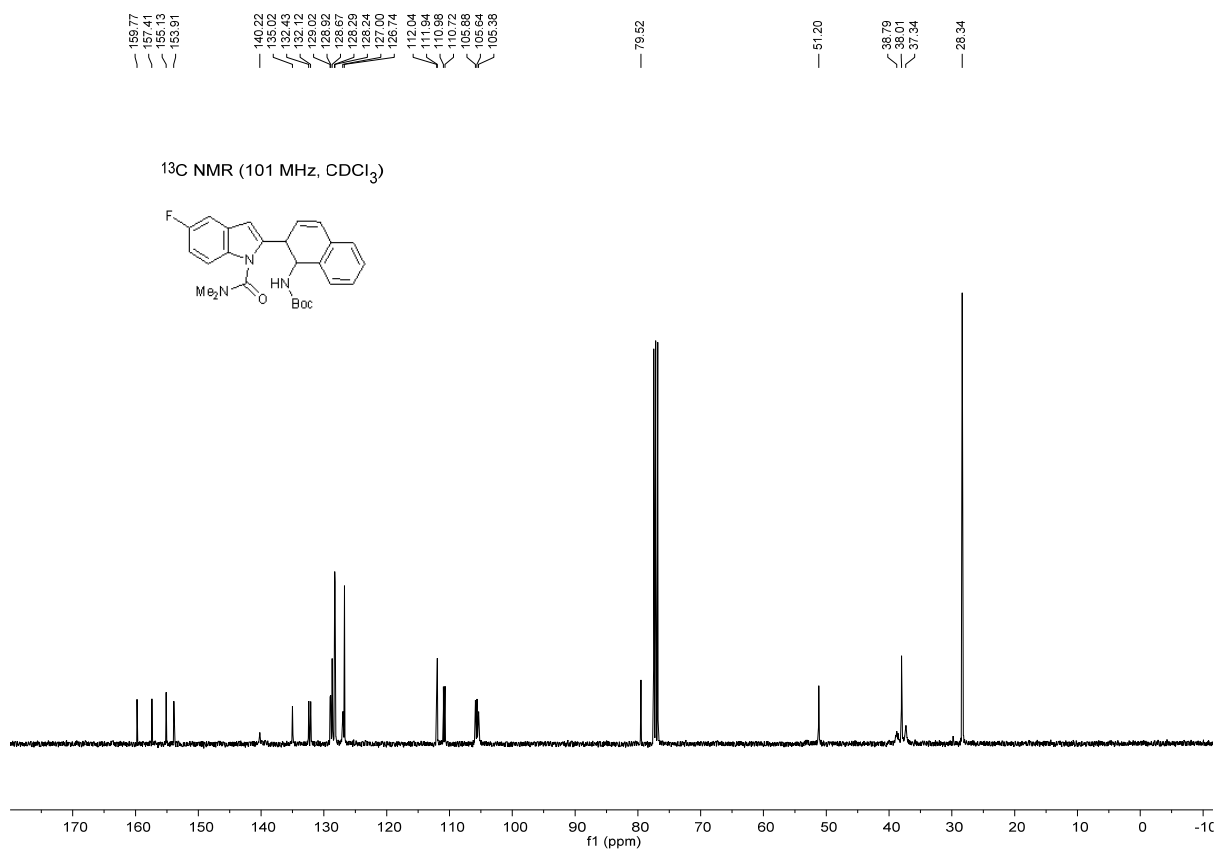



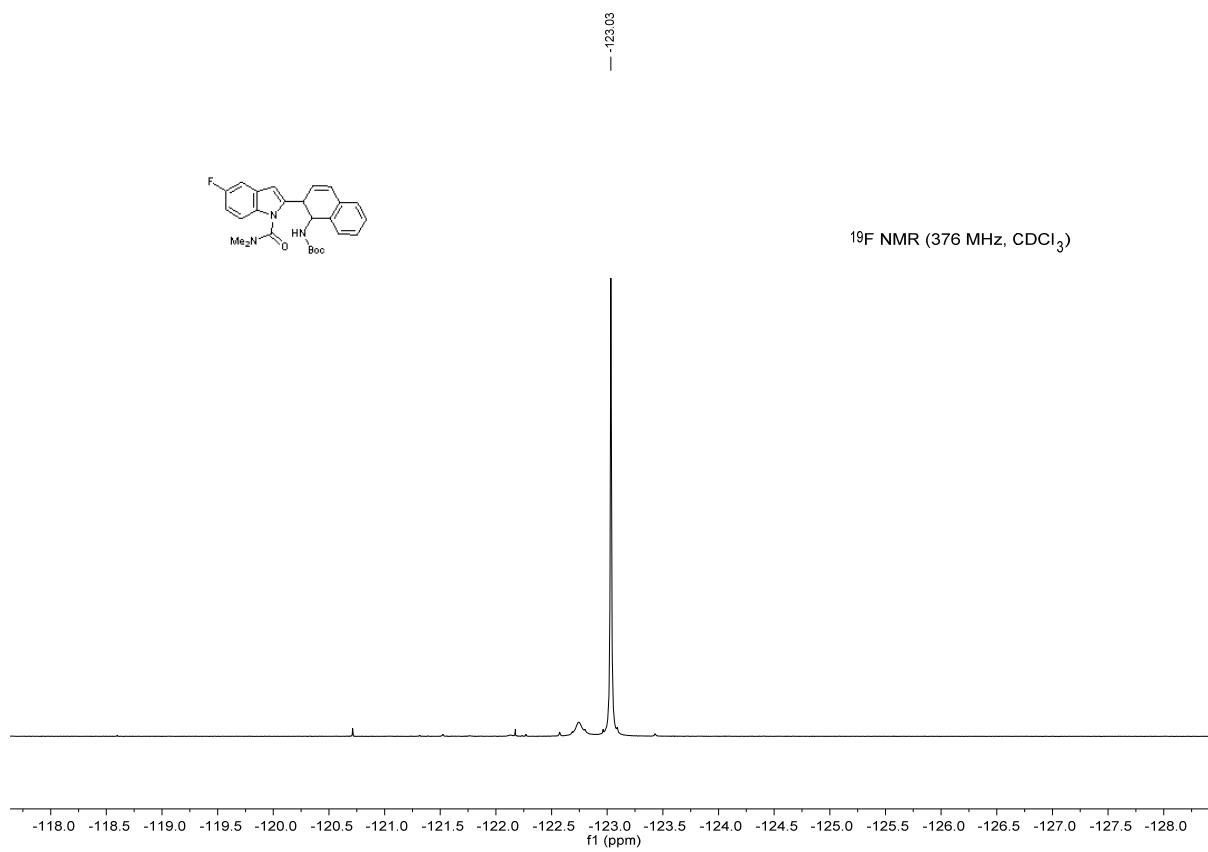

(11) *tert*-butyl (2-(5-chloro-1-(dimethylcarbamoyl)-1*H*-indol-2-yl)-1,2-dihydronaphthalen-1-yl)carbamate

(31)

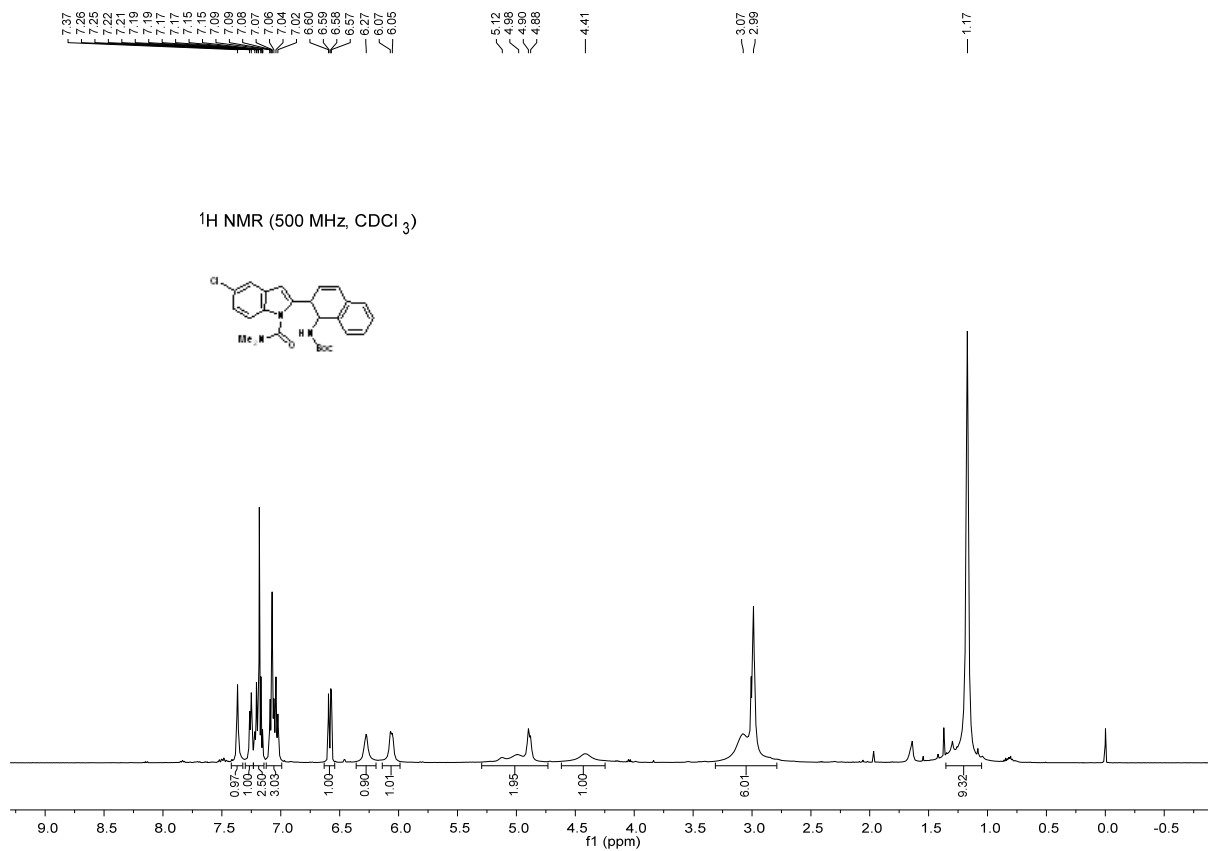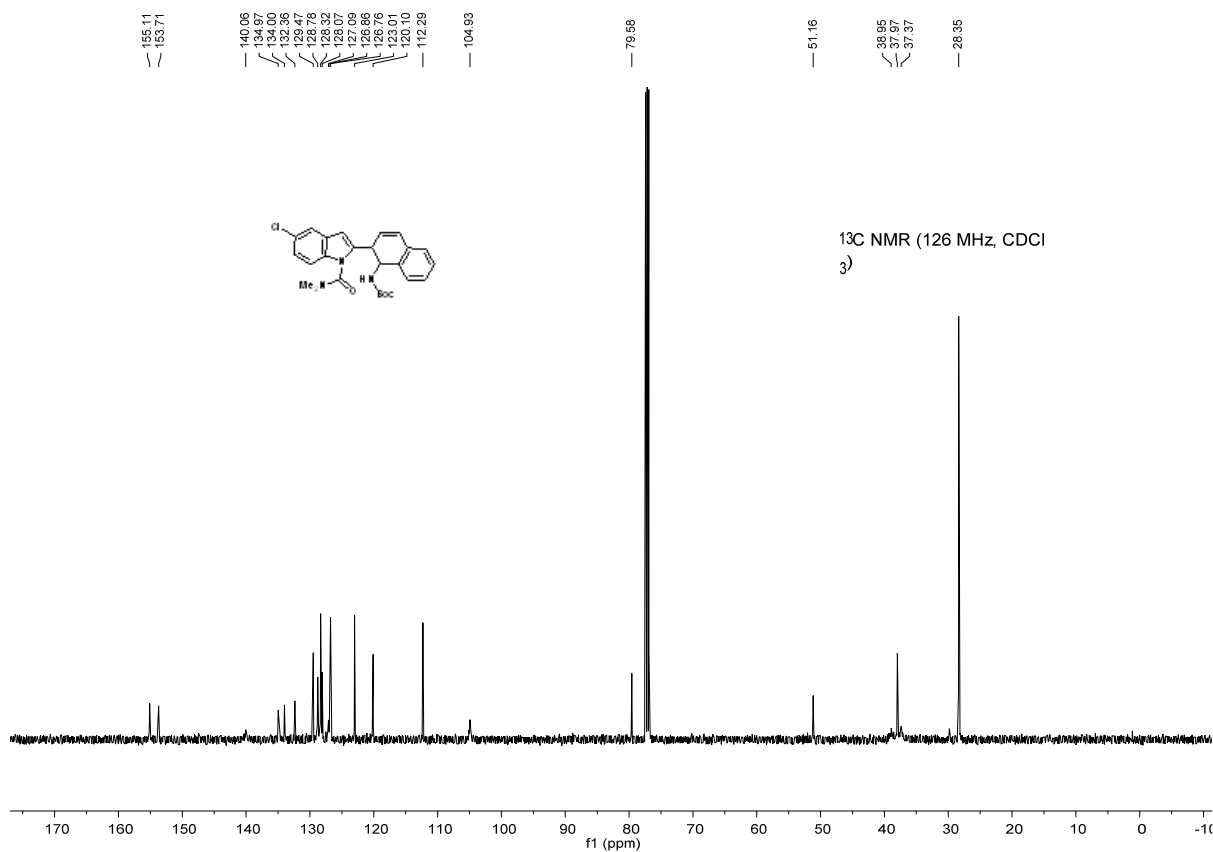

(12) *tert*-butyl (2-(5-bromo-1-(dimethylcarbamoyl)-1*H*-indol-2-yl)-1,2-dihydronaphthalen-1-yl)carbamate  
**(3m)**

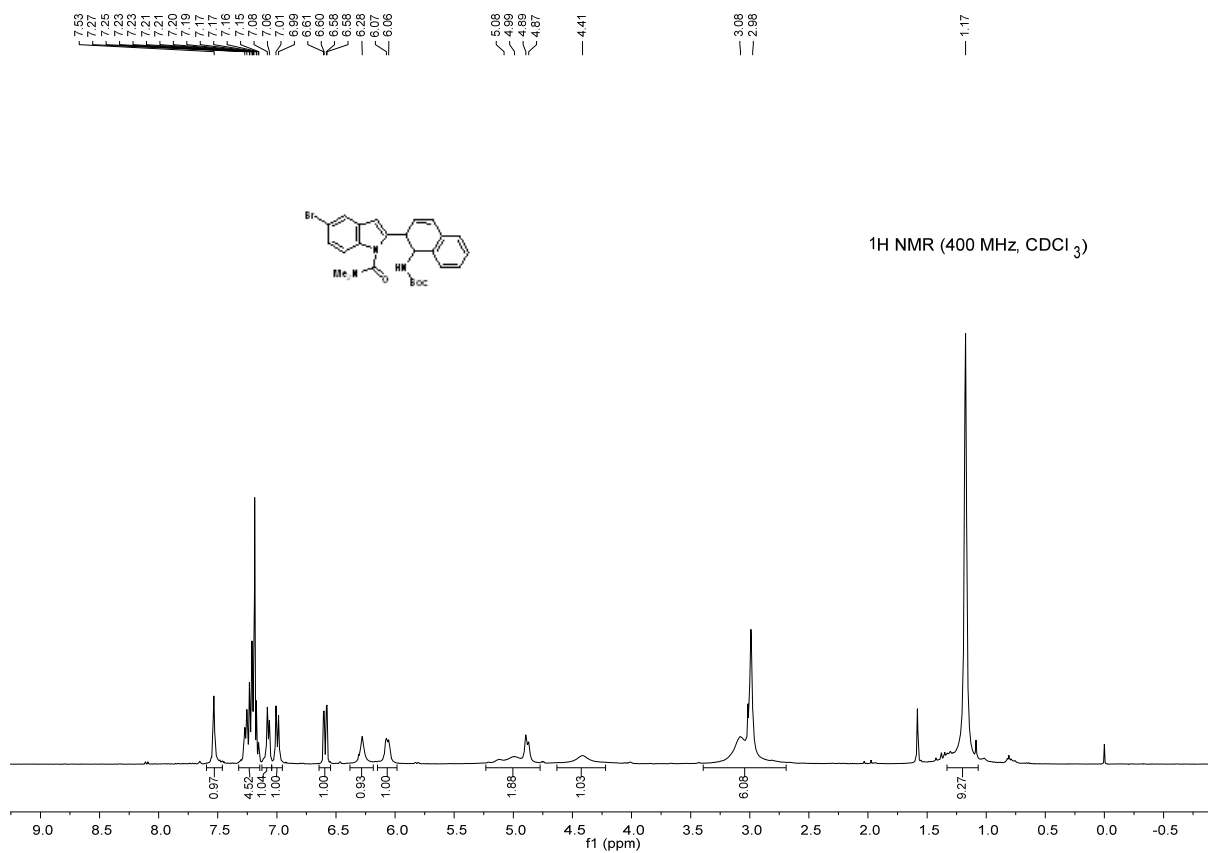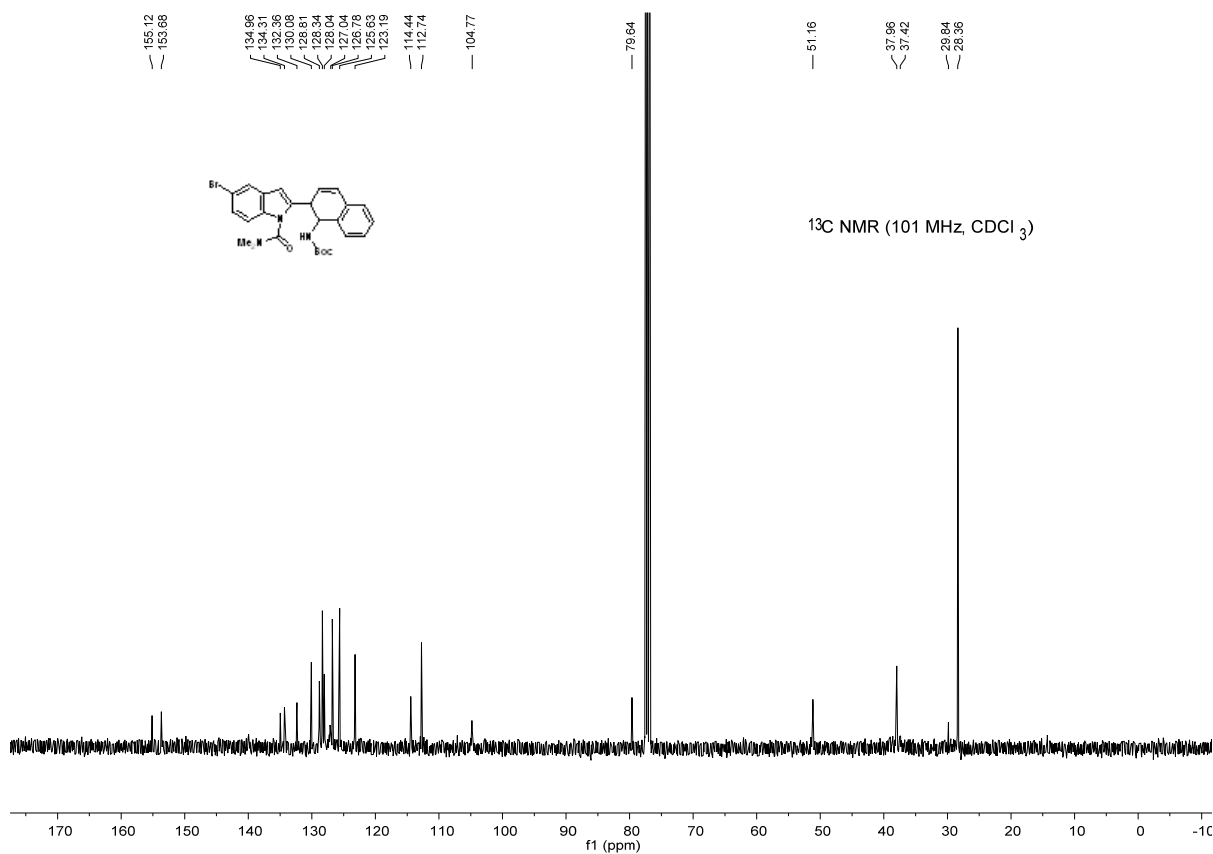

(13) *tert*-butyl (2-(1-(dimethylcarbamoyl)-5-iodo-1*H*-indol-2-yl)-1,2-dihydronaphthalen-1-yl)carbamate

(3n)

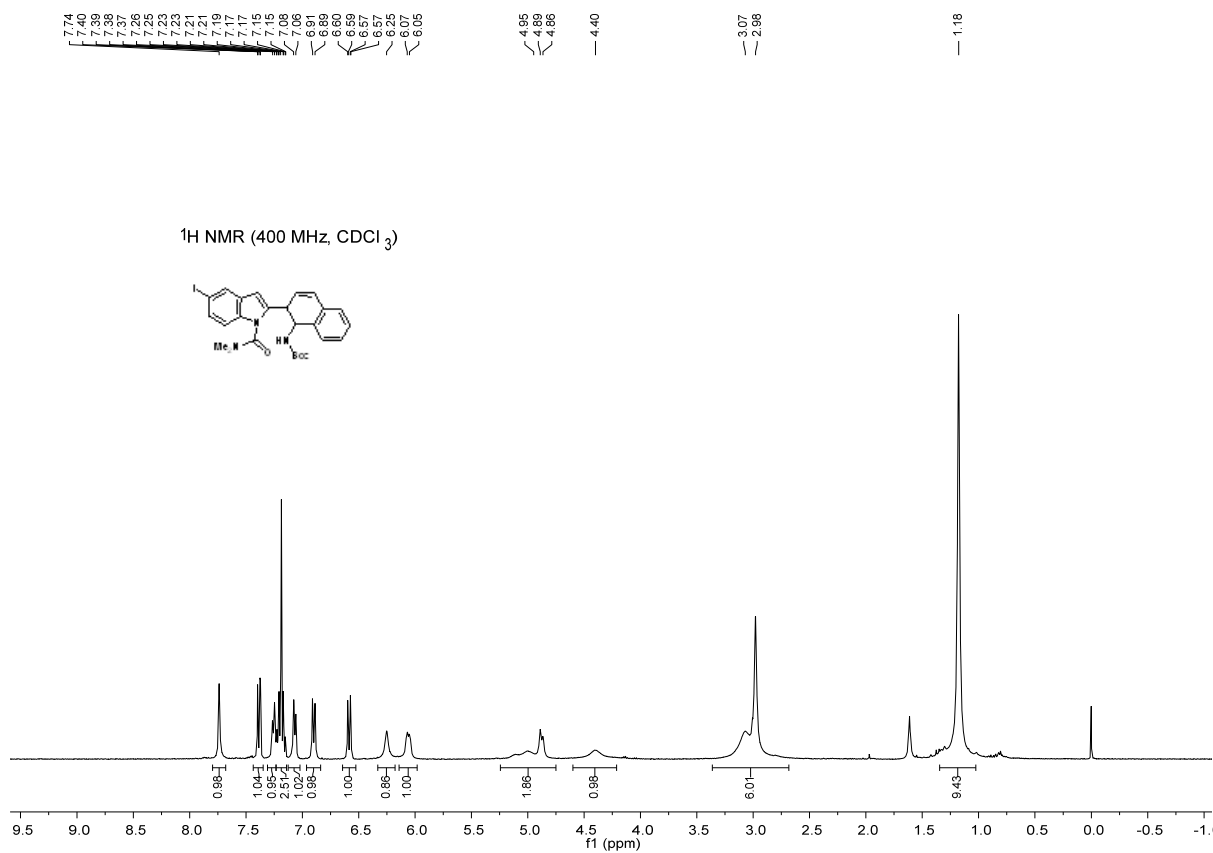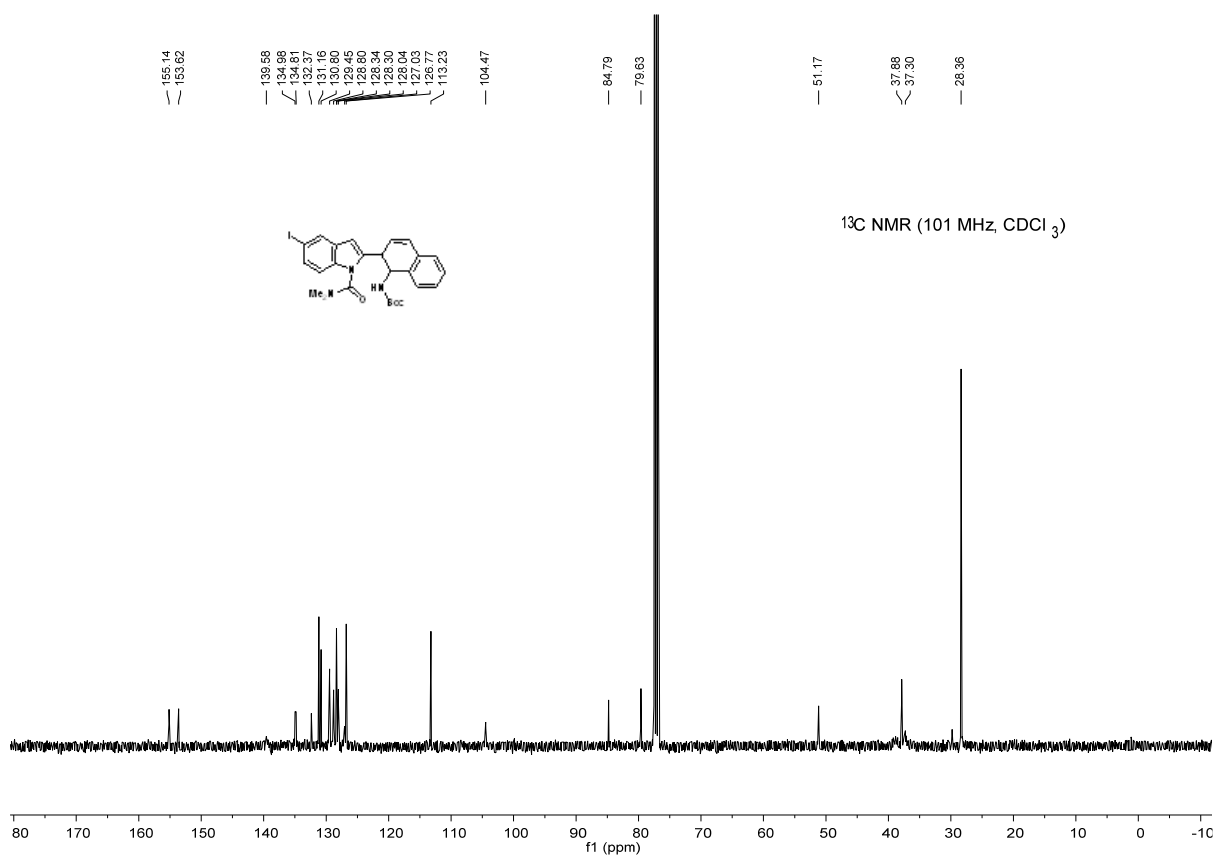

(14) *tert*-butyl (2-(1-(dimethylcarbamoyl)-6-methyl-1*H*-indol-2-yl)-1,2-dihydronaphthalen-1-yl)carbamate

(30)

7.25  
7.24  
7.20  
7.20  
7.18  
7.17  
7.15  
7.15  
7.13  
7.13  
7.05  
7.04  
6.90  
6.87  
6.85  
6.85  
6.53  
6.53  
6.23  
6.09  
6.07  
5.09  
5.01  
4.91  
4.86  
4.34  
3.07  
2.99  
2.36  
1.19

<sup>1</sup>H NMR (400 MHz, CDCl<sub>3</sub>)

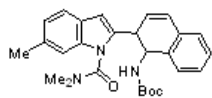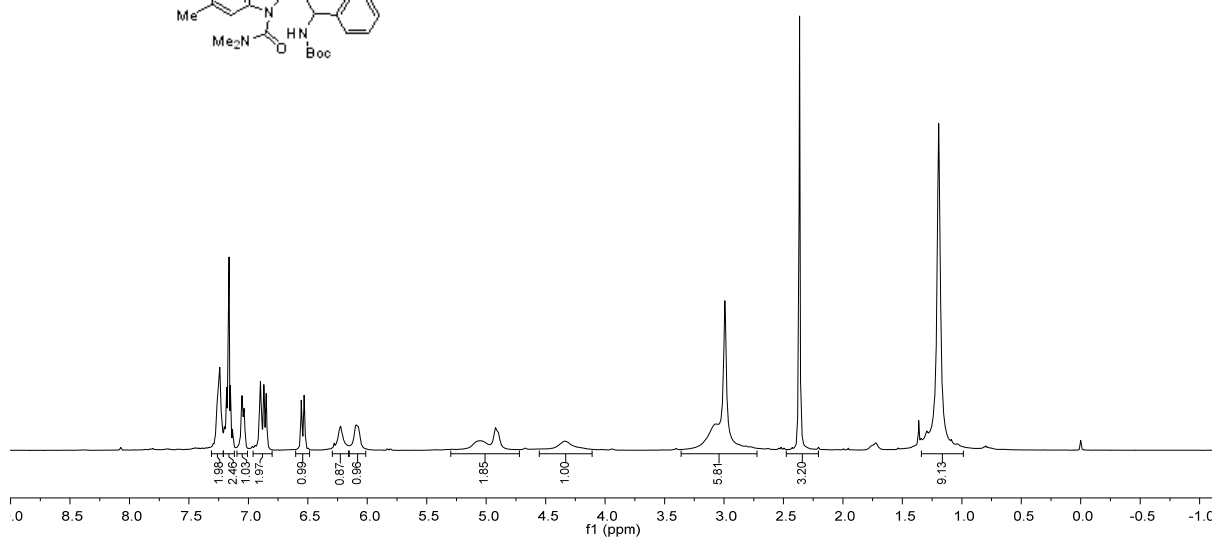

155.30  
154.25  
136.08  
132.77  
132.60  
128.59  
128.36  
128.17  
128.06  
128.15  
128.15  
122.89  
120.25  
111.34  
105.10  
79.48  
77.36  
51.30  
38.74  
37.74  
37.24  
28.39  
22.00

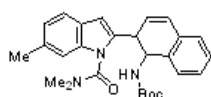

<sup>13</sup>C NMR (126 MHz, CDCl<sub>3</sub>)

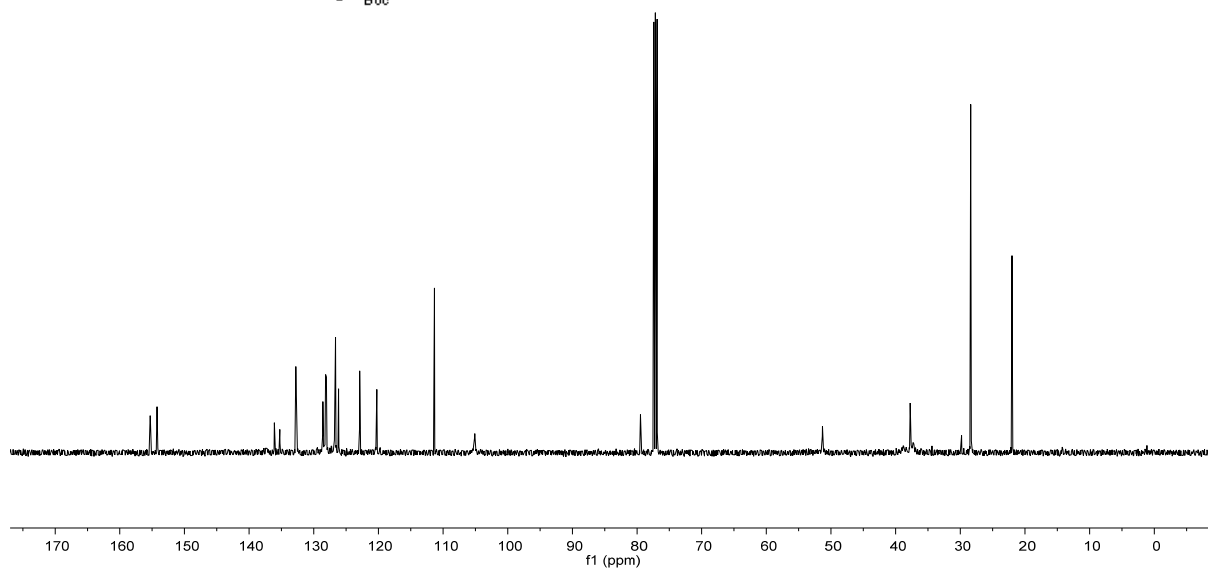

(15) *tert*-butyl (2-(1-(dimethylcarbamoyl)-6-methoxy-1*H*-indol-2-yl)-1,2-dihydronaphthalen-1-yl)carbamate (**3p**)

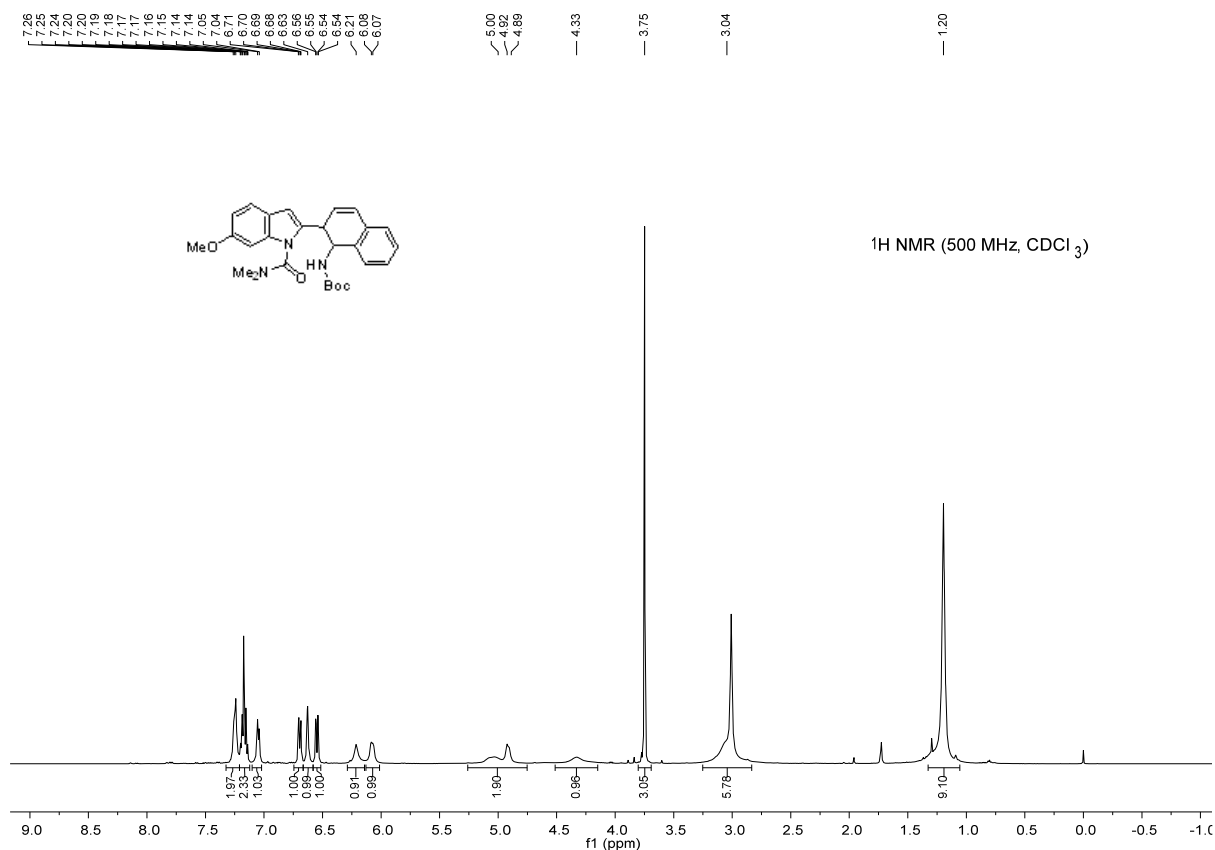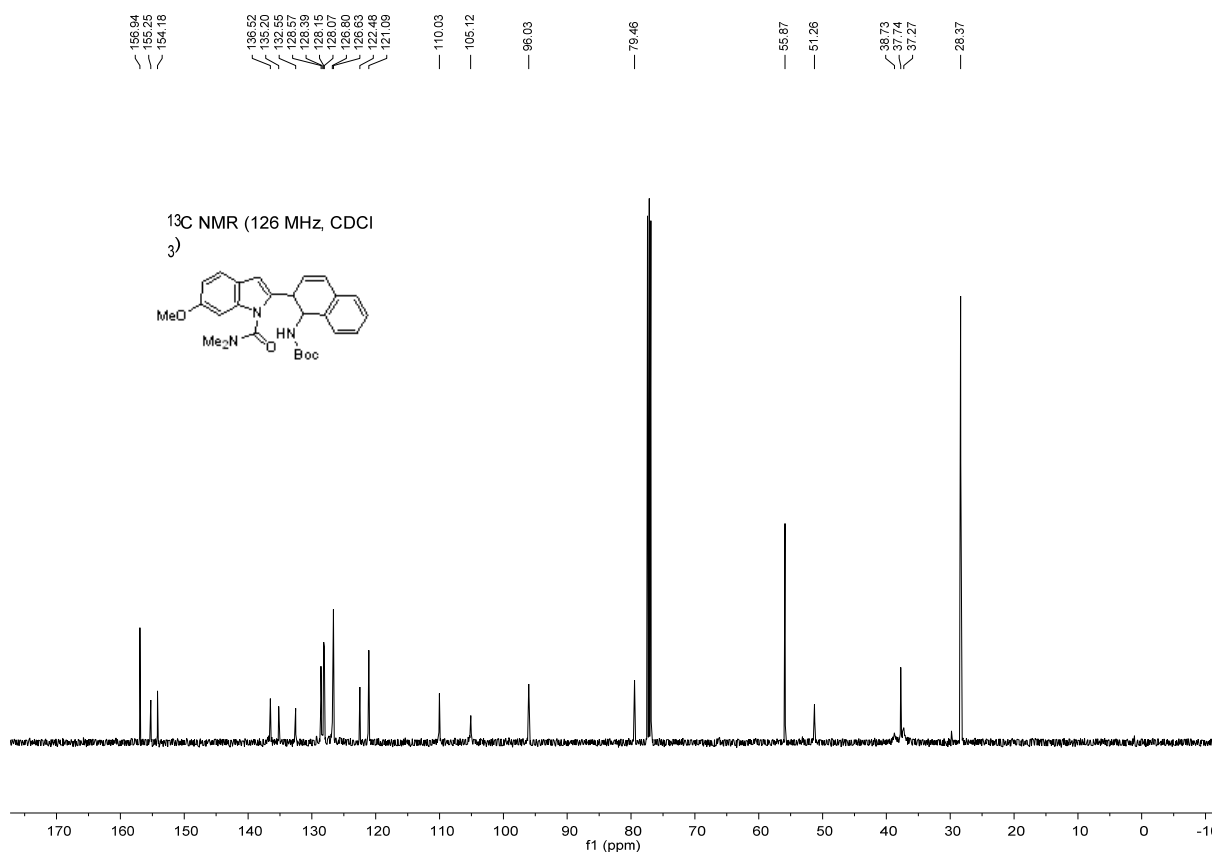

(16) *tert*-butyl (2-(1-(dimethylcarbamoyl)-6-fluoro-1*H*-indol-2-yl)-1,2-dihydronaphthalen-1-yl)carbamate

(3q)

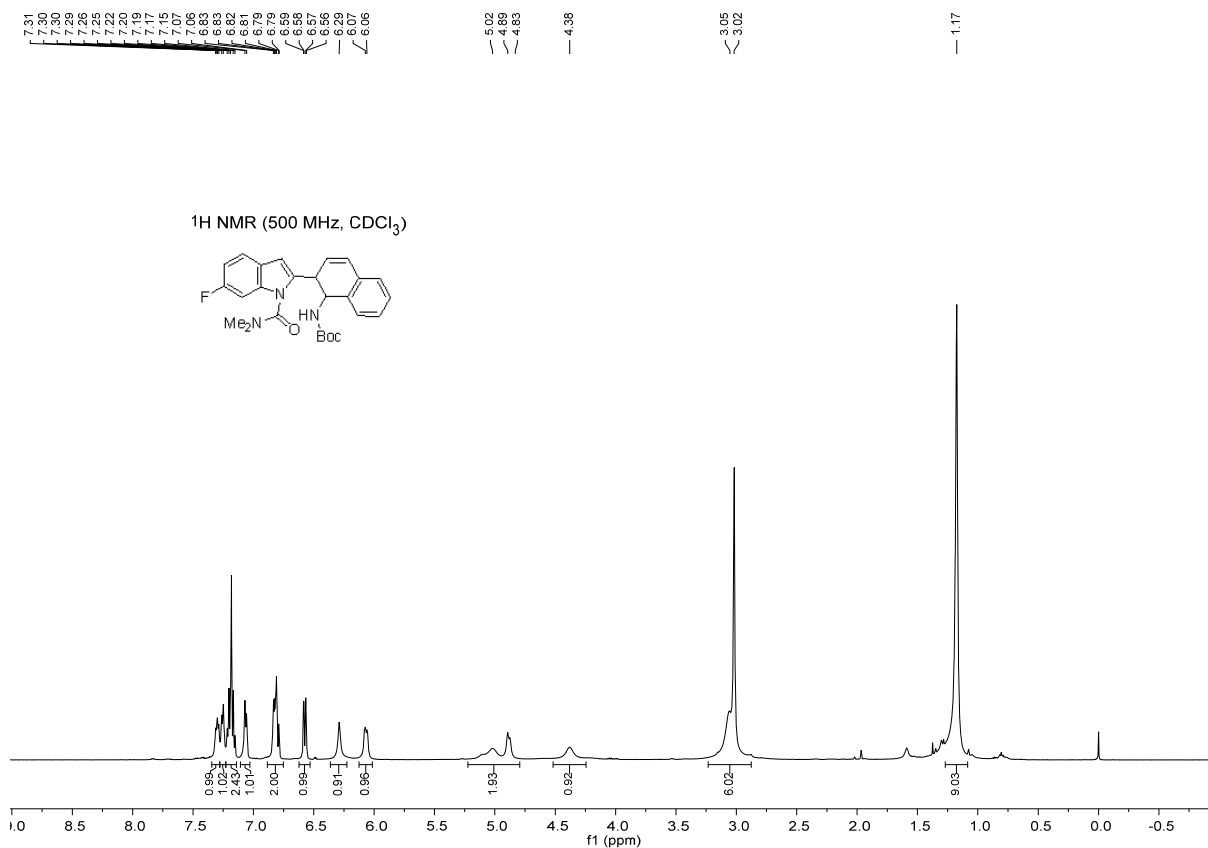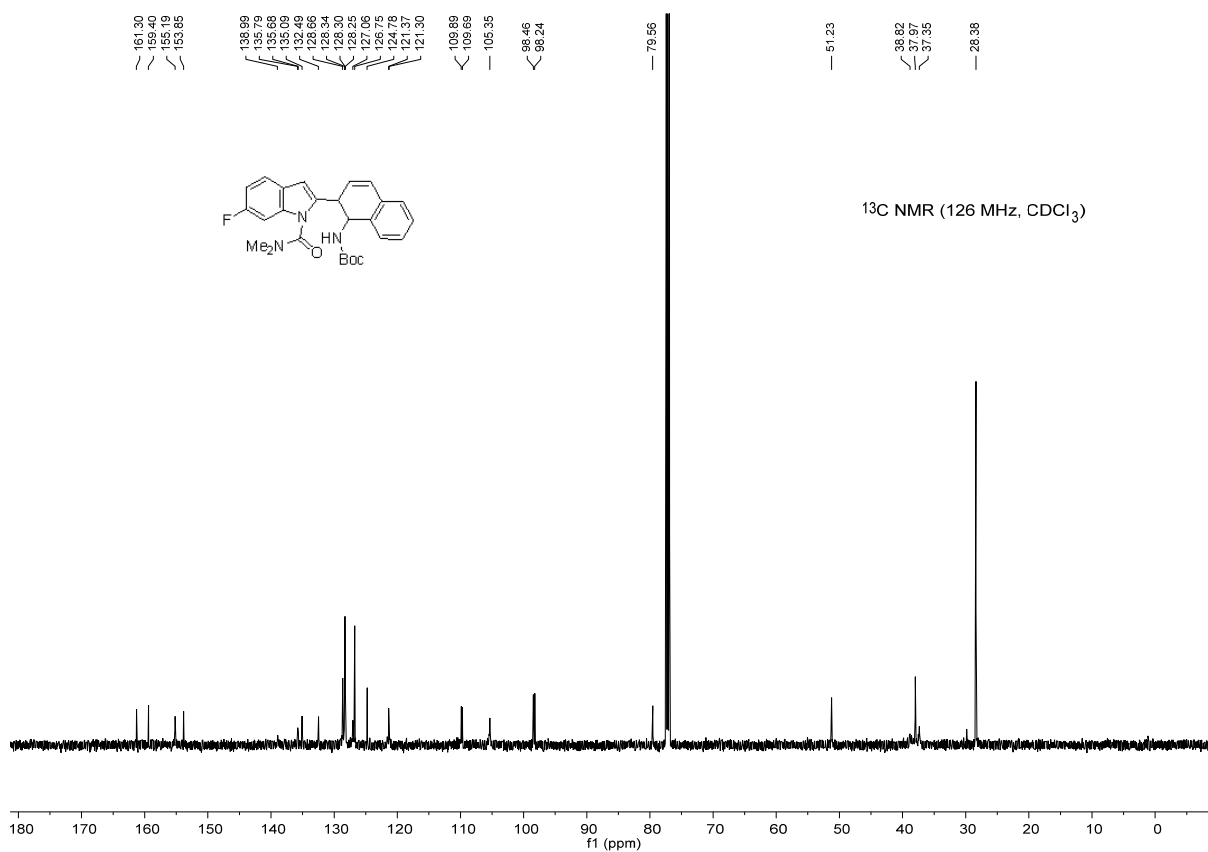

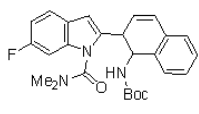

<sup>19</sup>F NMR (471 MHz, CDCl<sub>3</sub>)

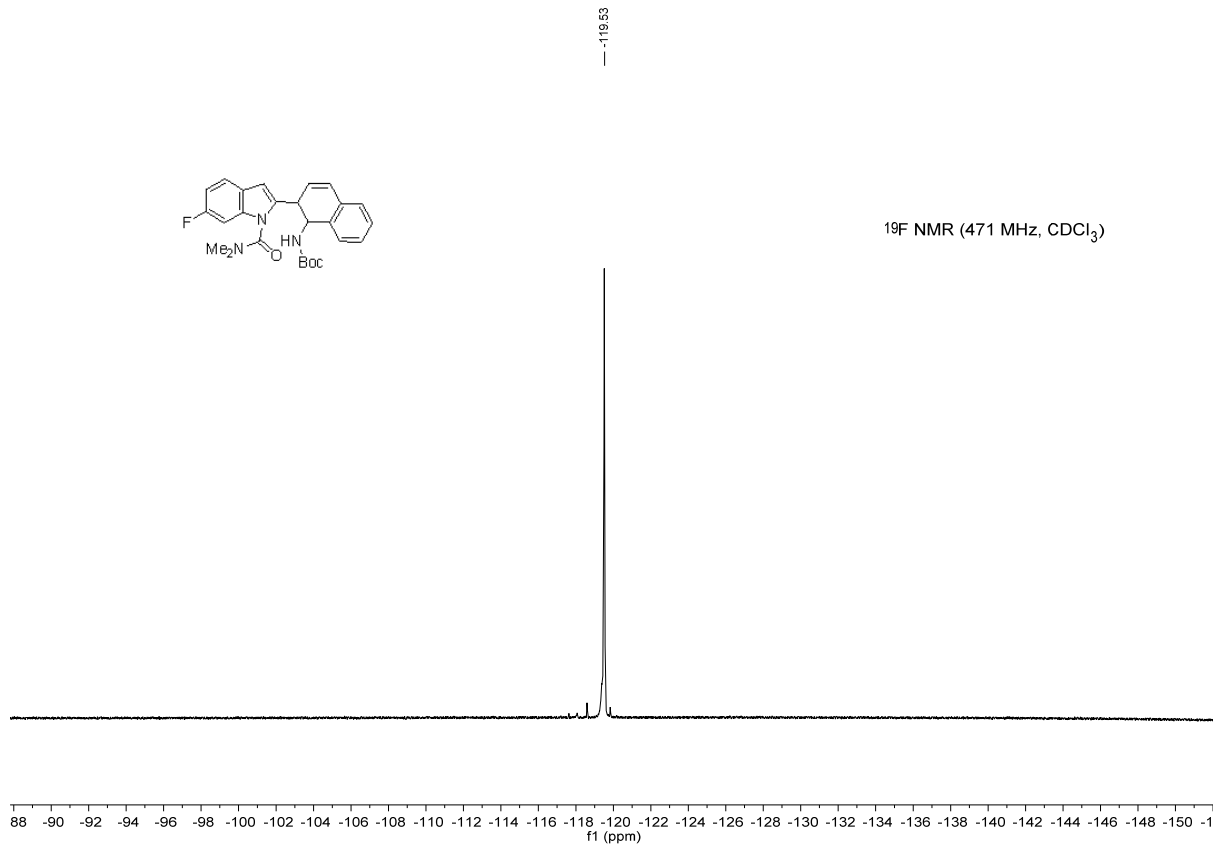



(17) *tert*-butyl (2-(1-(diethylcarbamoyl)-1*H*-indol-2-yl)-1,2-dihydronaphthalen-1-yl)carbamate (**3r**)

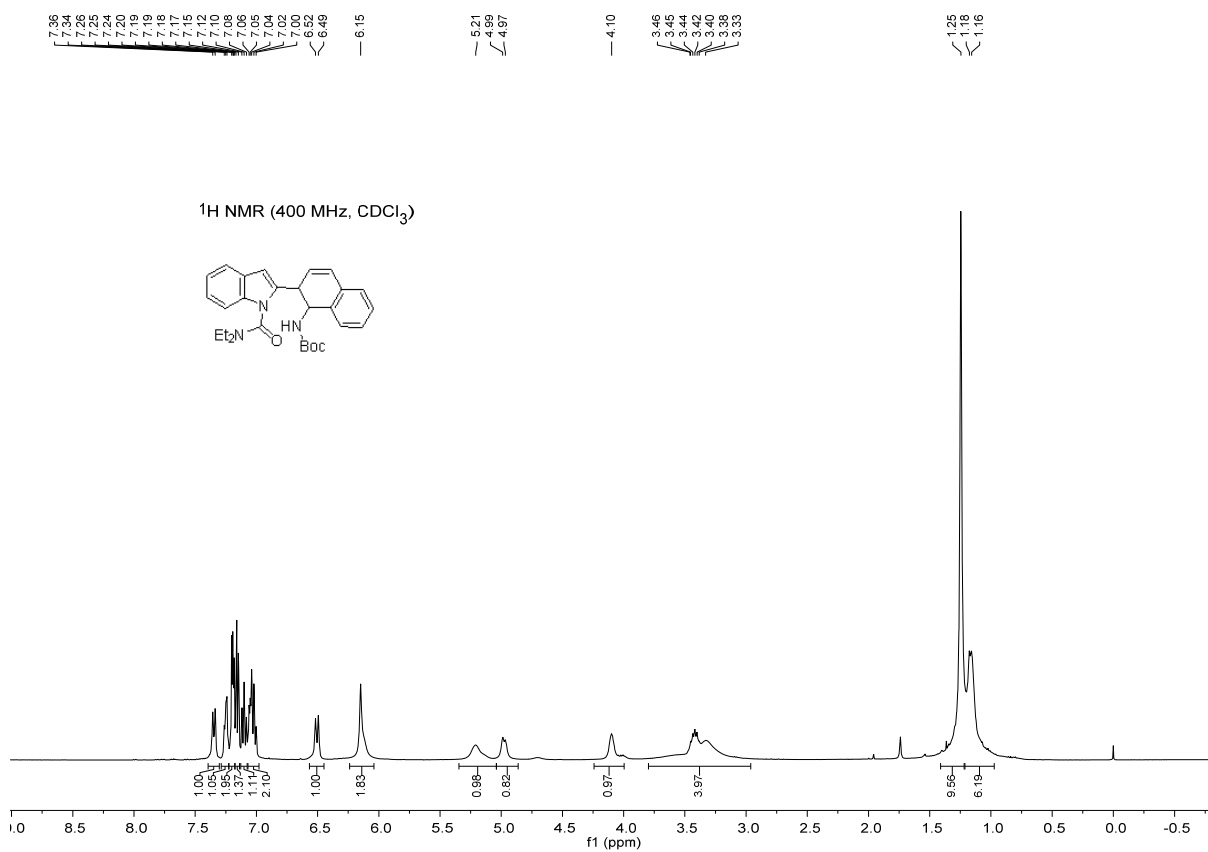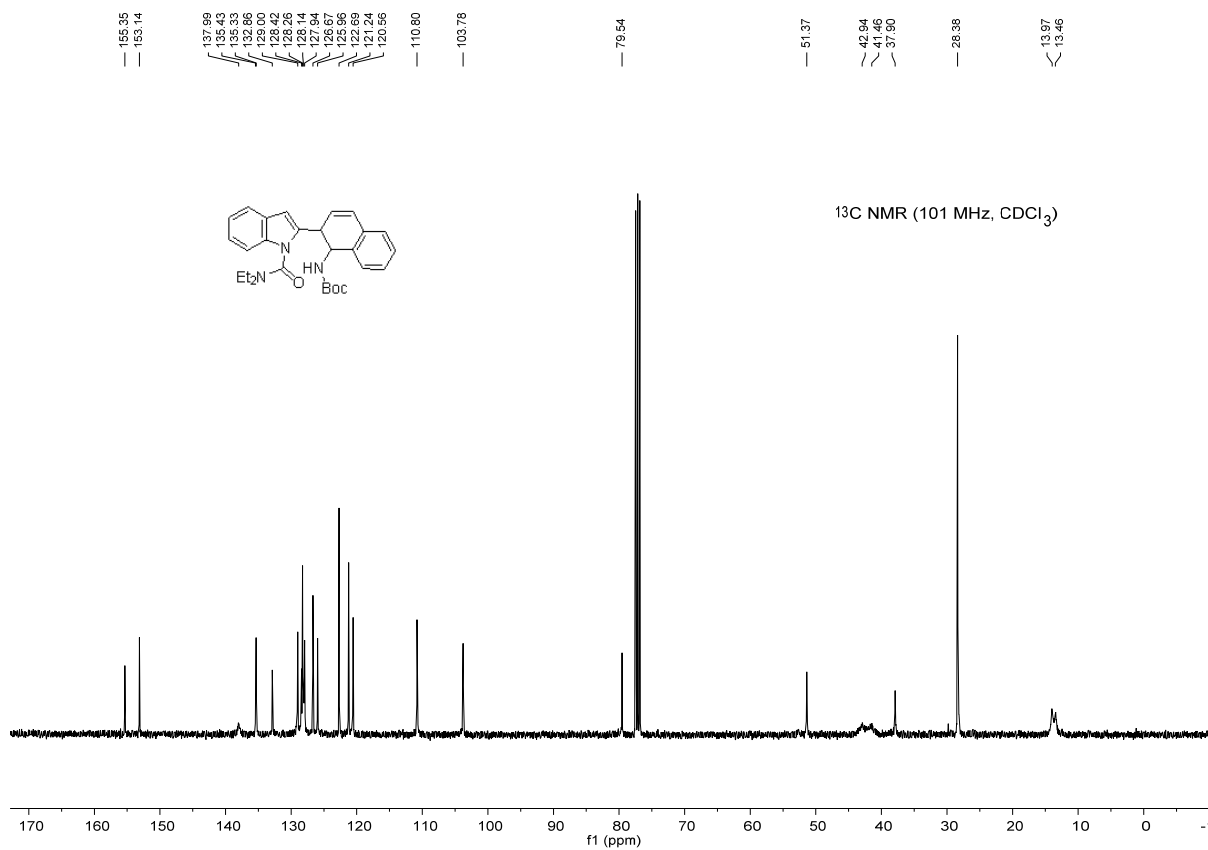

(18) *tert*-butyl (2-(1-(dimethylcarbamoyl)-1*H*-indol-2-yl)-6,7-difluoro-1,2-dihydronaphthalen-1-yl)carbamate (**3s**)

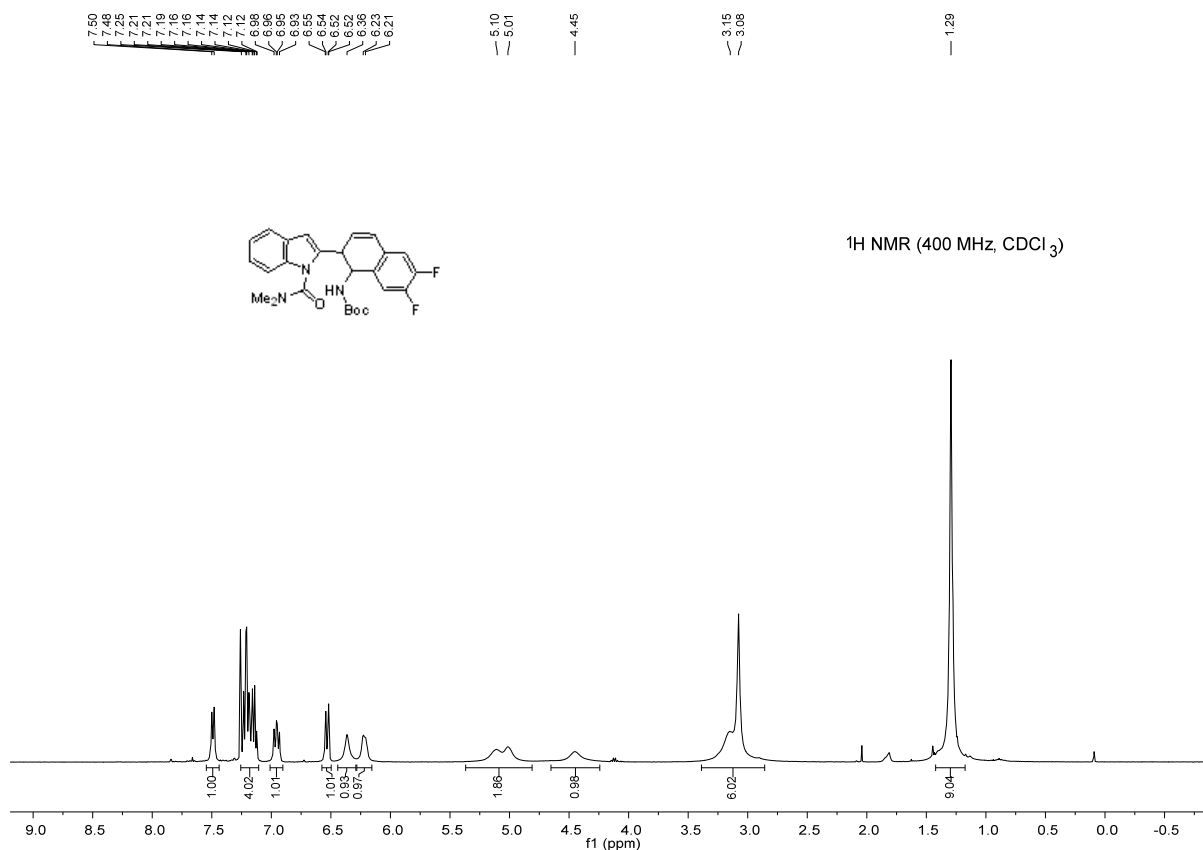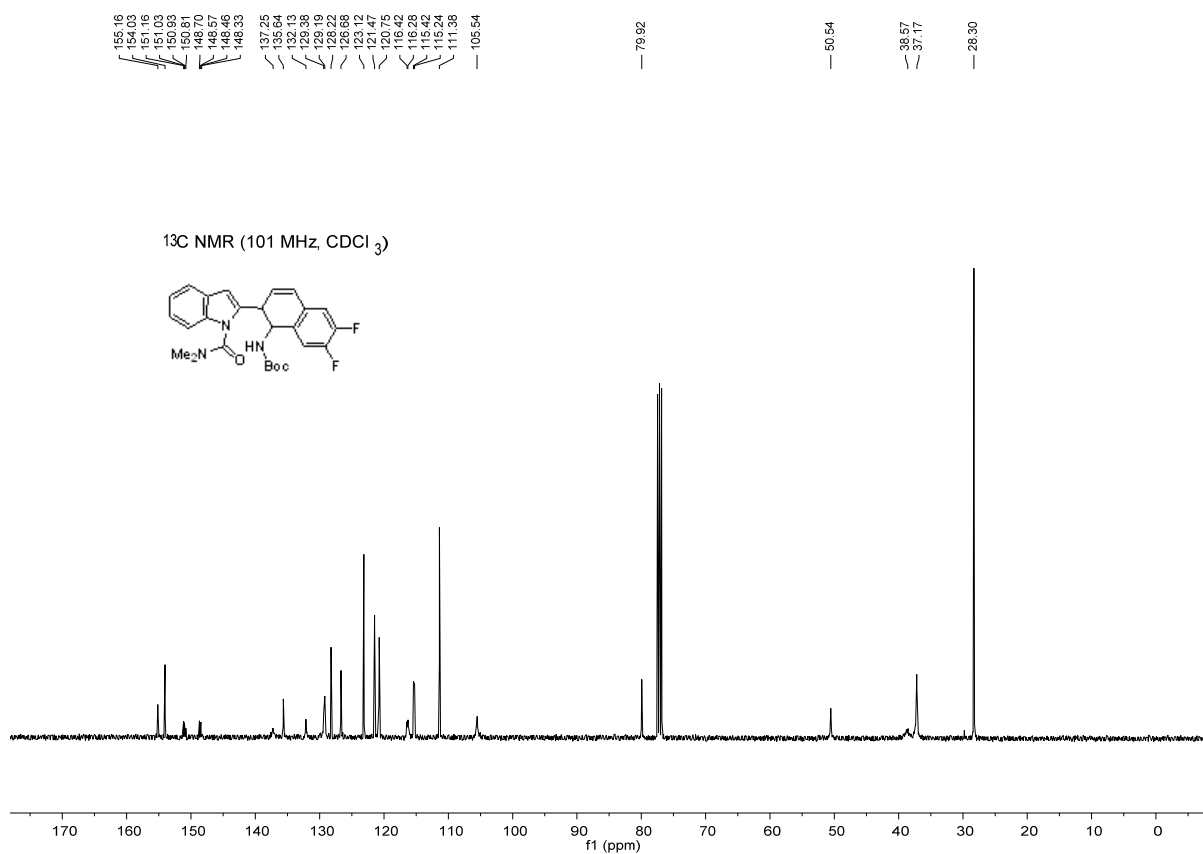

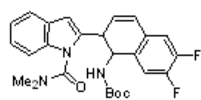

<sup>19</sup>F NMR (376 MHz, CDCl<sub>3</sub>)

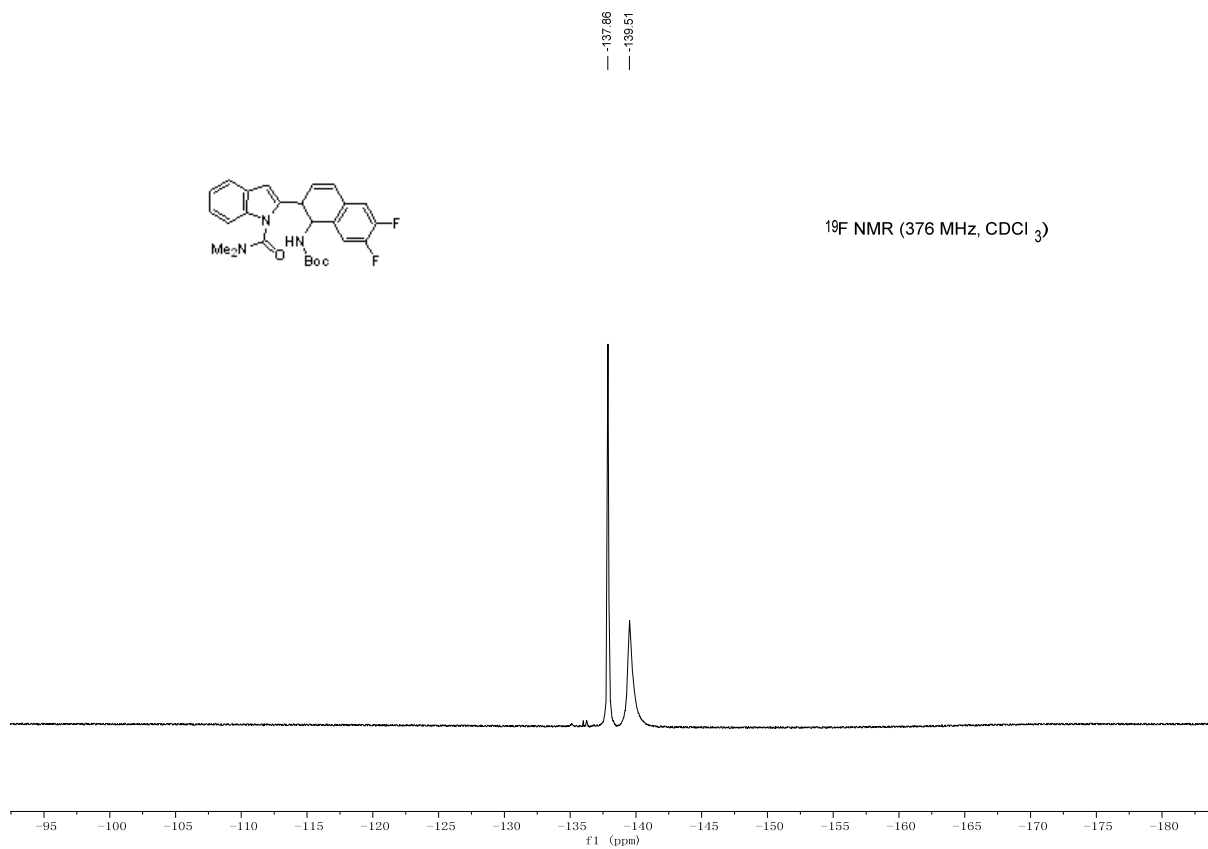

(19) *tert*-butyl (2-(1-(dimethylcarbamoyl)-1*H*-indol-2-yl)-7-fluoro-1,2-dihydronaphthalen-1-yl)carbamate and *tert*-butyl (2-(1-(dimethylcarbamoyl)-1*H*-indol-2-yl)-6-fluoro-1,2-dihydronaphthalen-1-yl)carbamate (3t)

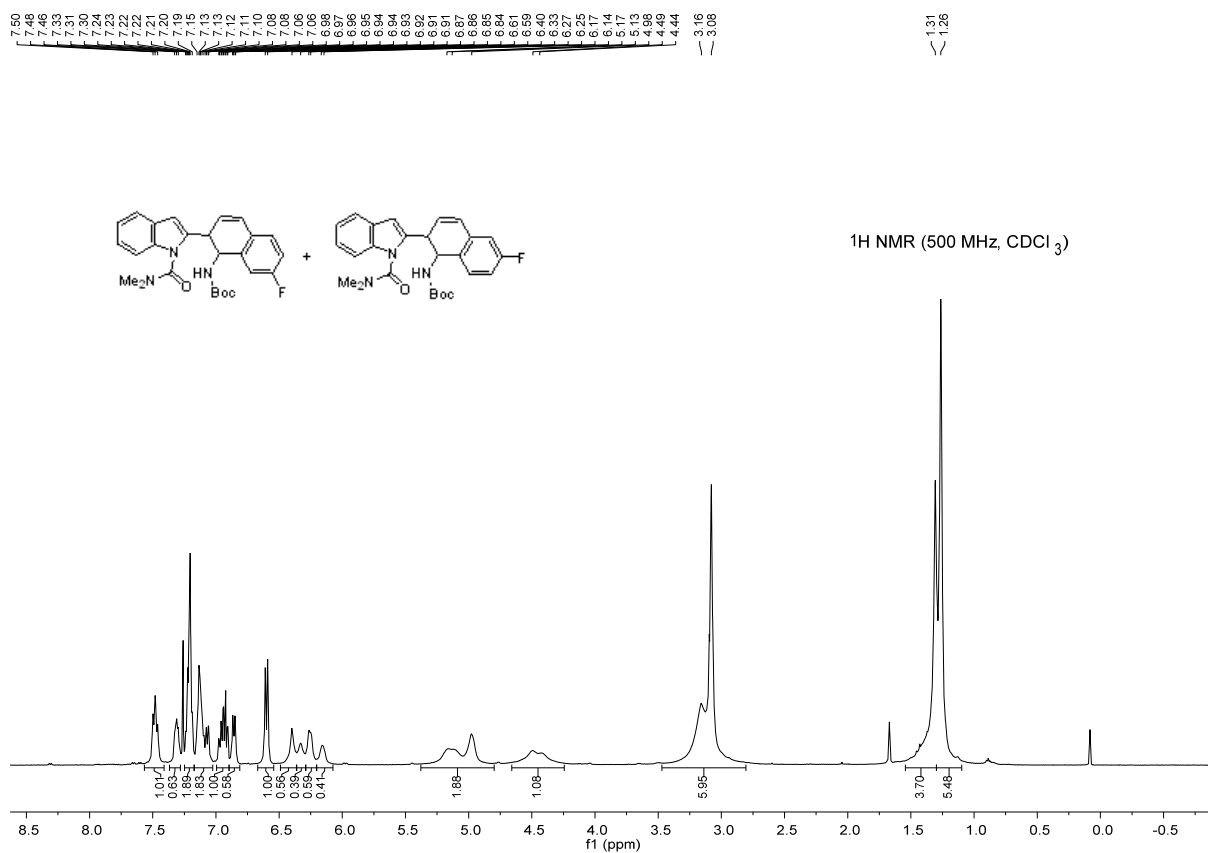

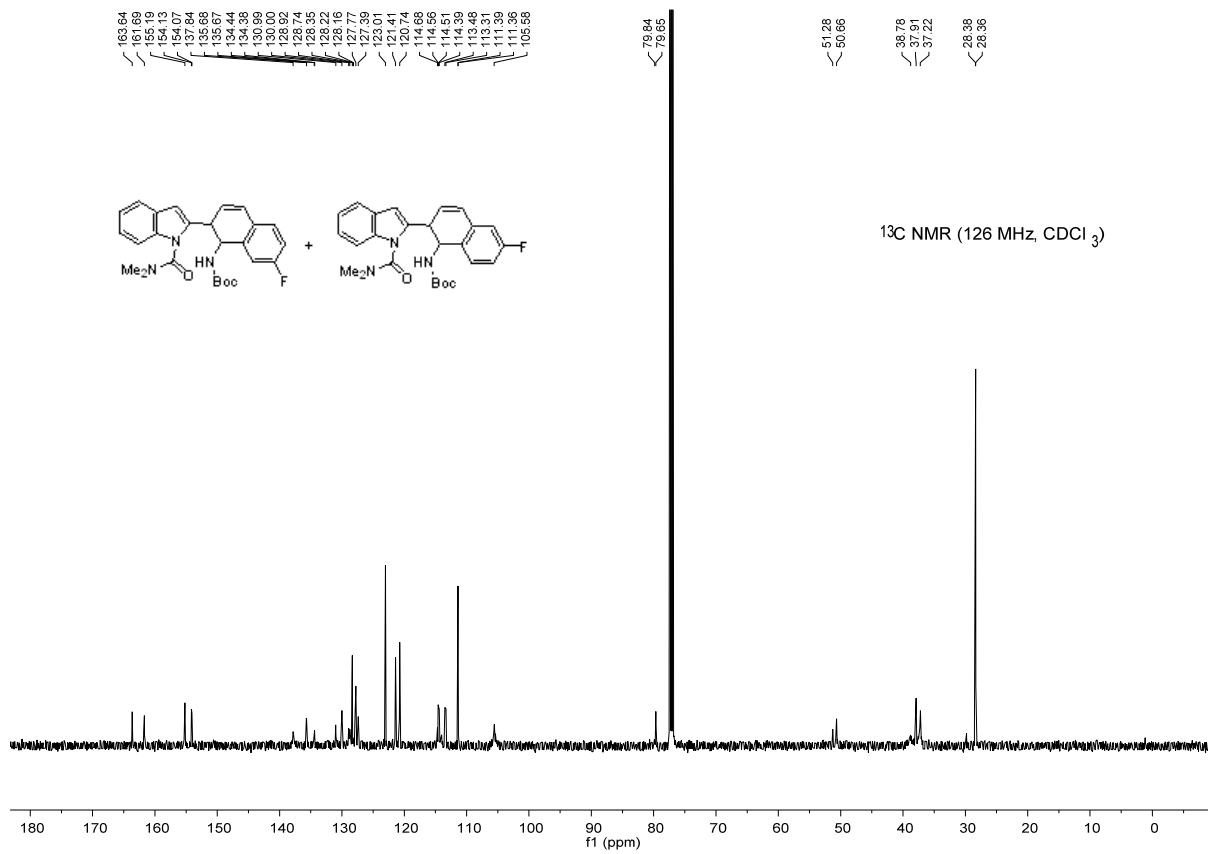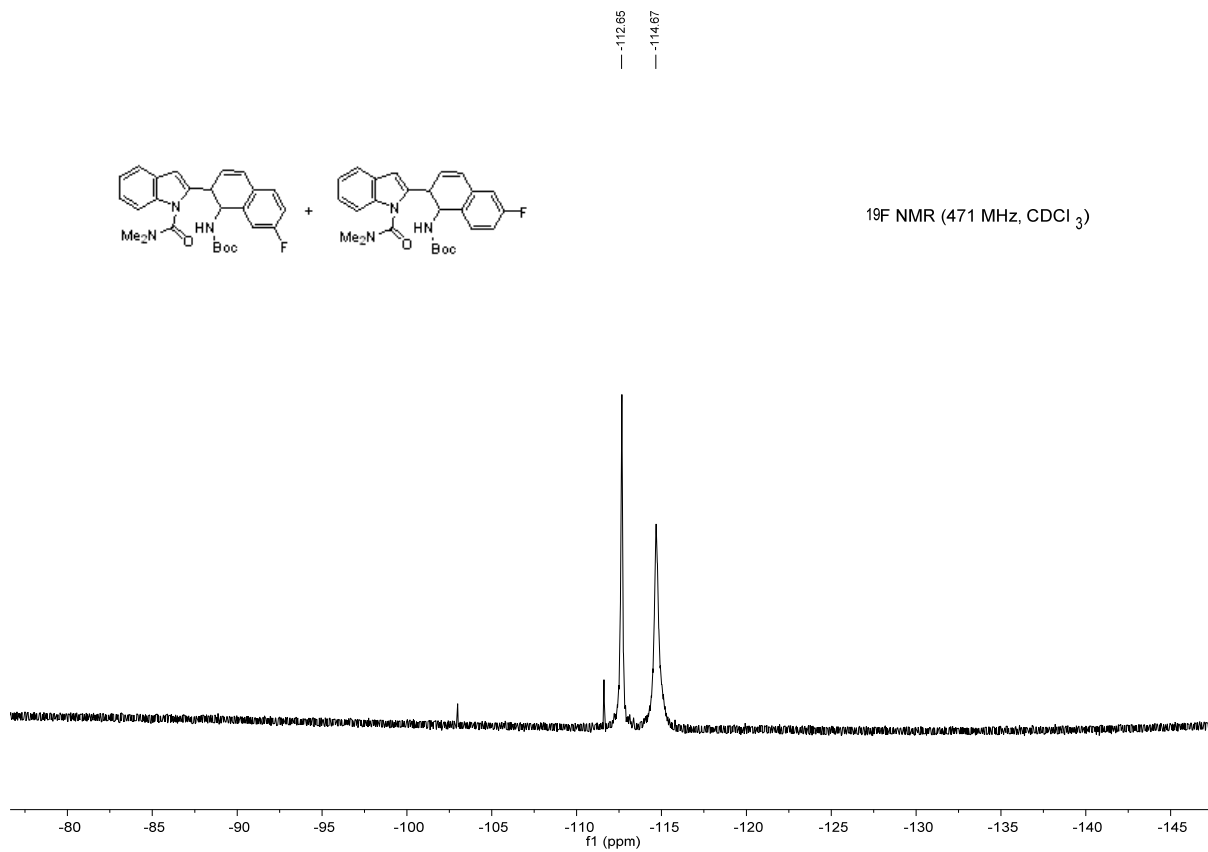

(20) *tert*-butyl (2-(1-(dimethylcarbamoyl)-1*H*-pyrrol-2-yl)-1,2-dihydronaphthalen-1-yl)carbamate (**3u**)

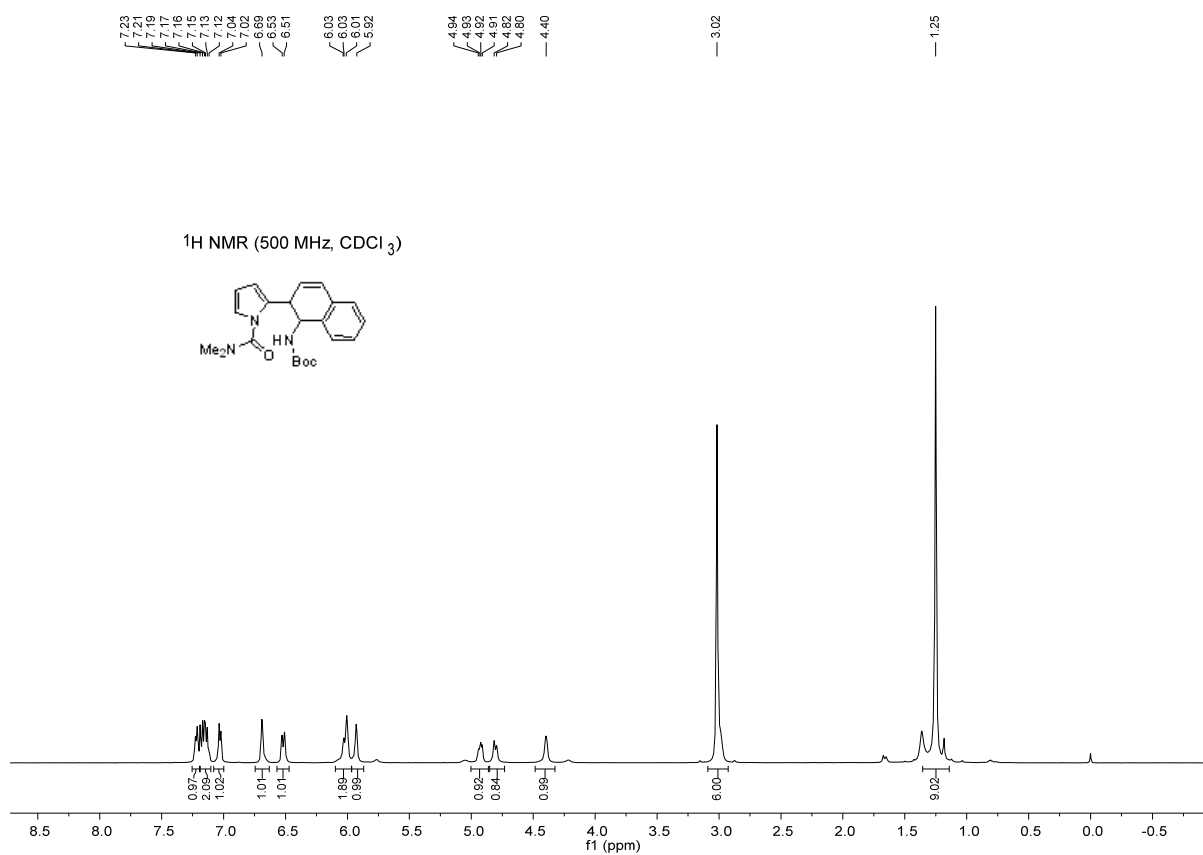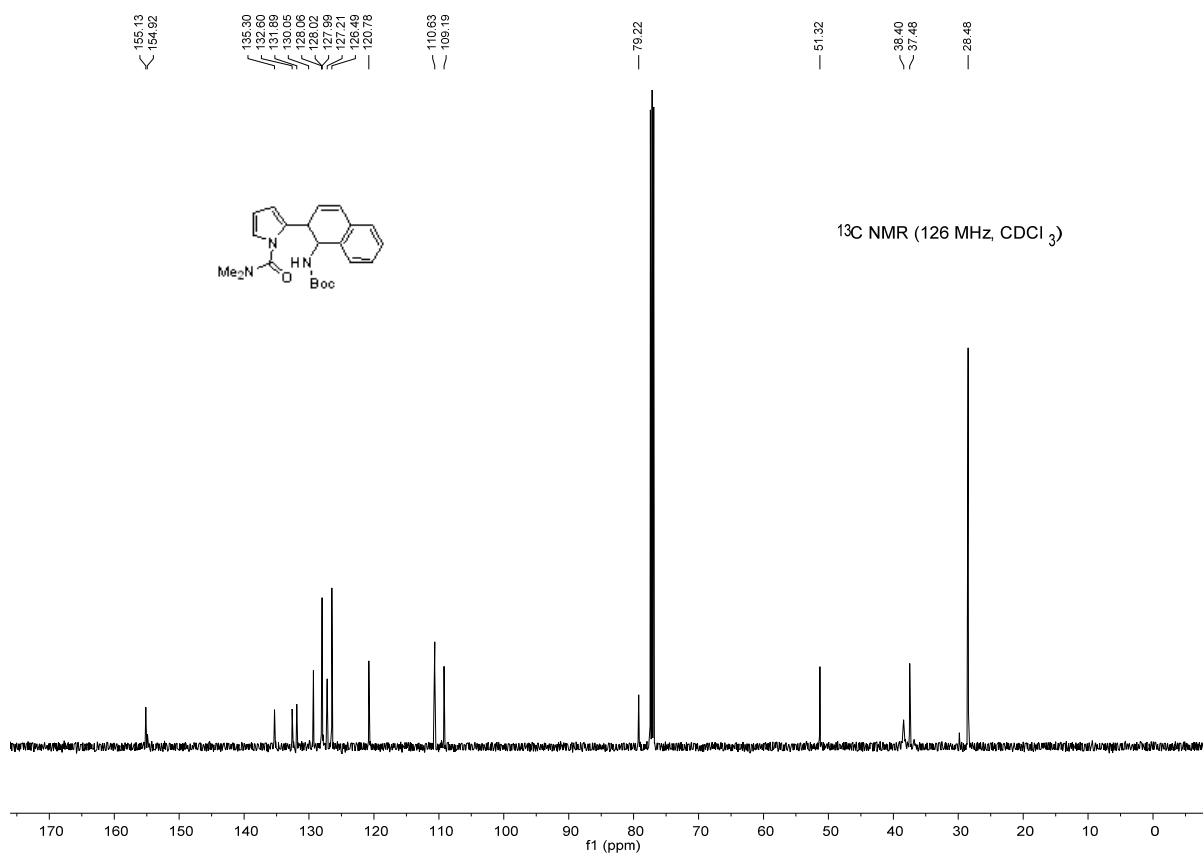

(21) *tert*-butyl (2-(4-acetyl-1-(dimethylcarbamoyl)-1*H*-pyrrol-2-yl)-1,2-dihydronaphthalen-1-yl)carbamate  
**(3v)**

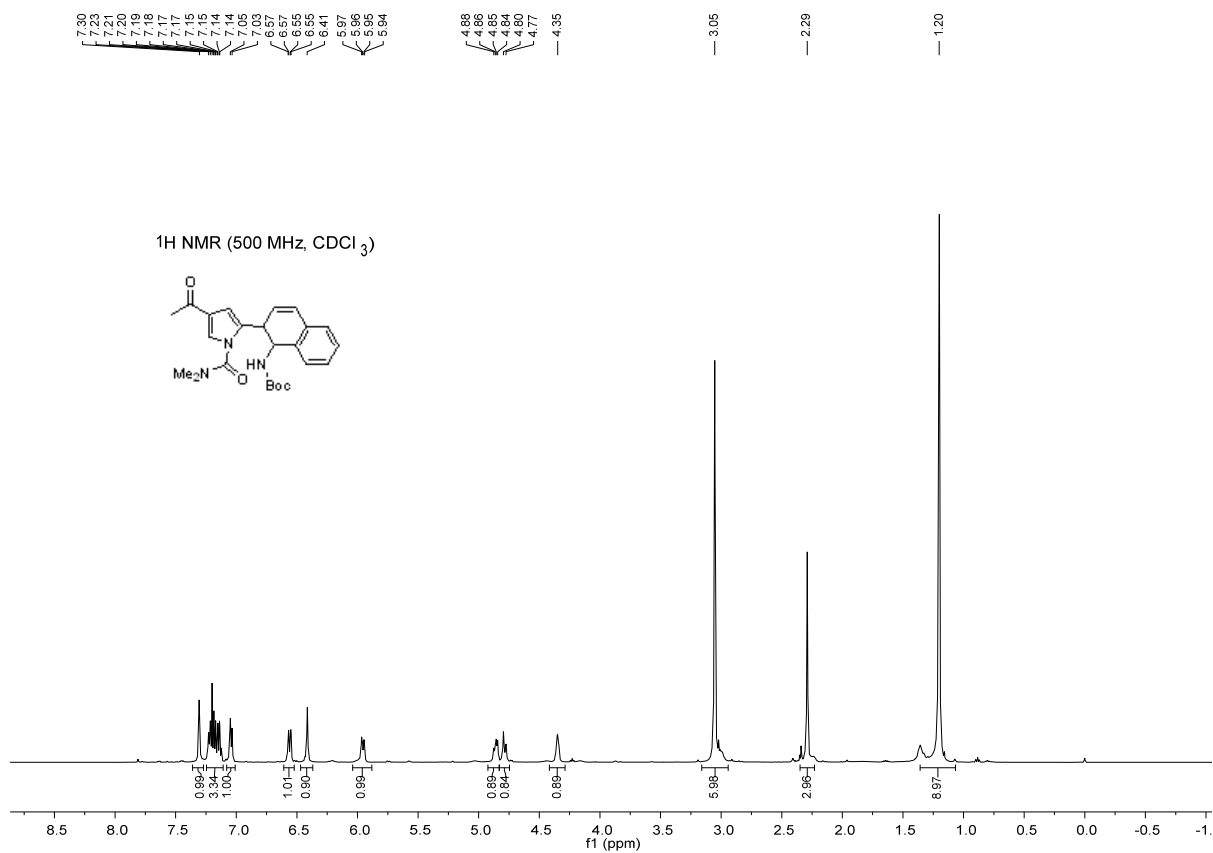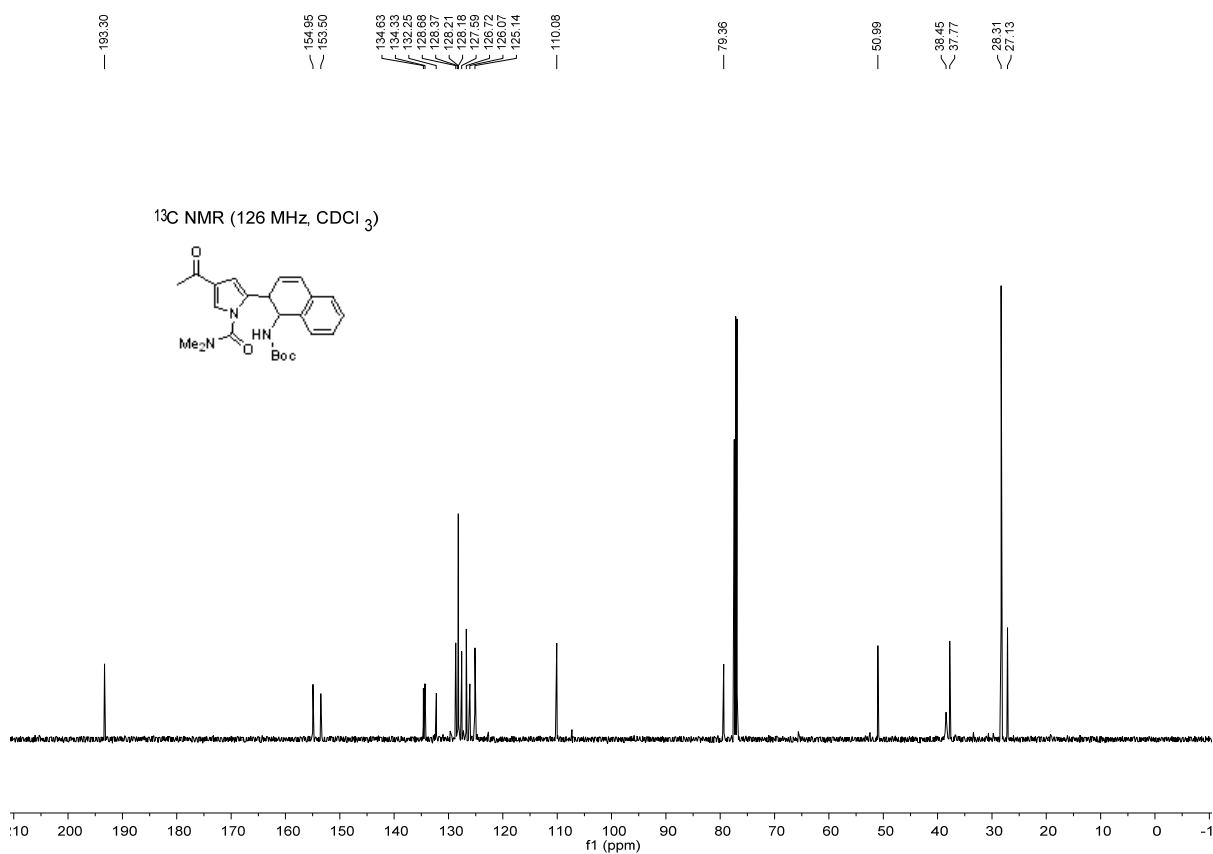

(22) *tert*-butyl (2-(1-(dimethylcarbamoyl)indolin-7-yl)-1,2-dihydronaphthalen-1-yl)carbamate (**5a**)

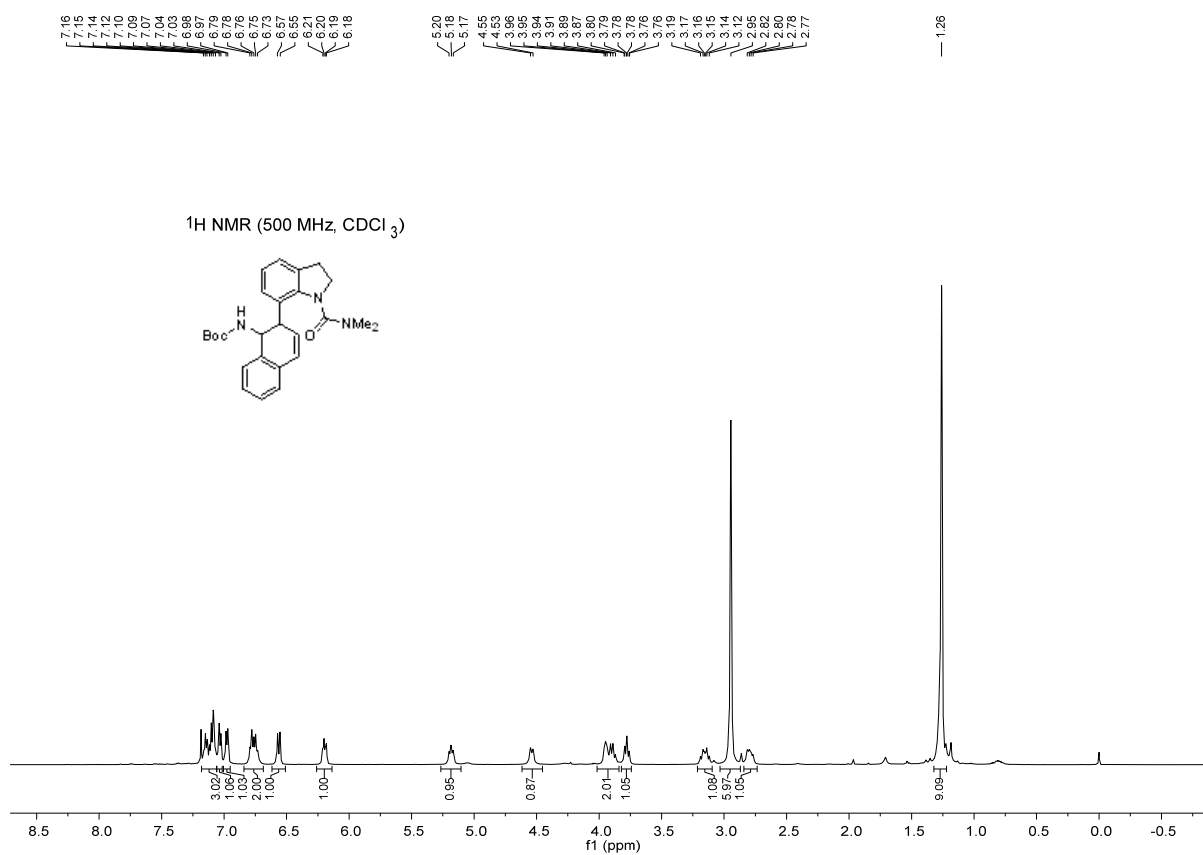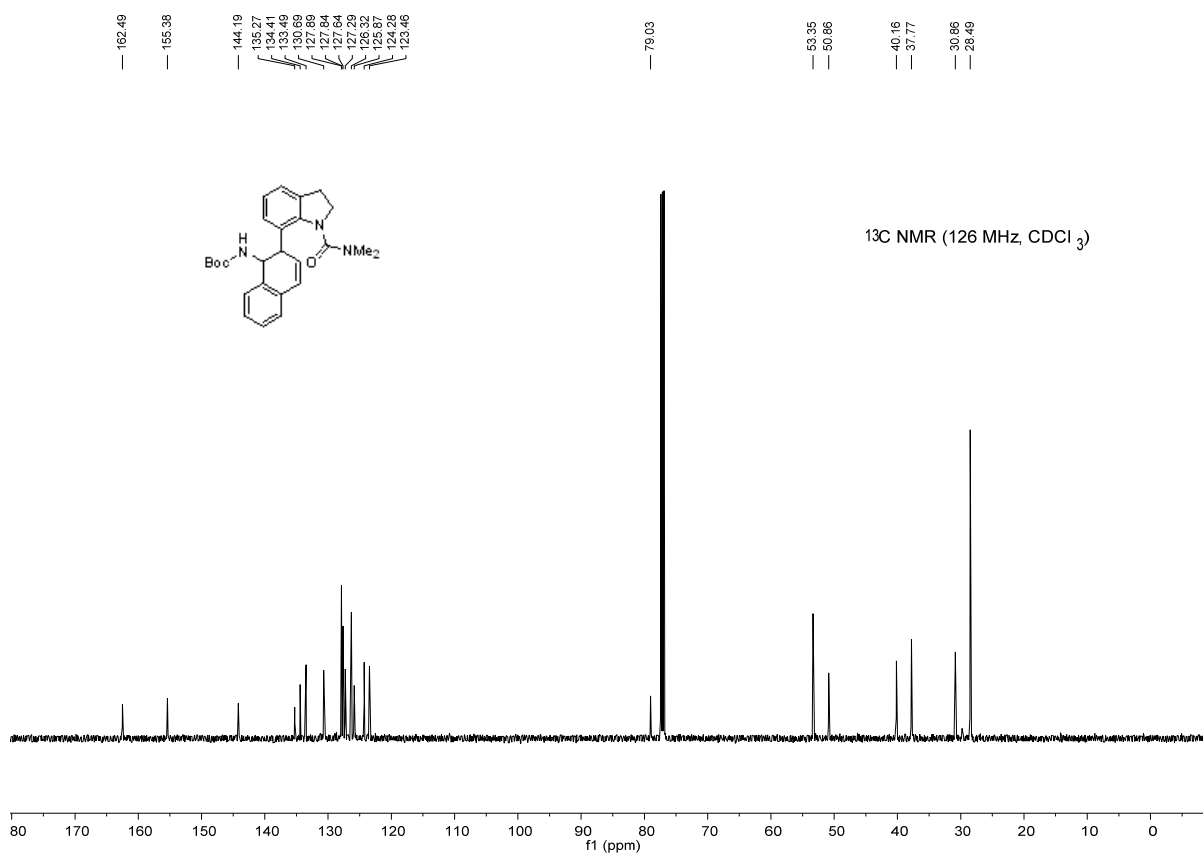



(23) *tert*-butyl (2-(1-(dimethylcarbamoyl)-5-methylindolin-7-yl)-1,2-dihydronaphthalen-1-yl)carbamate

(5b)

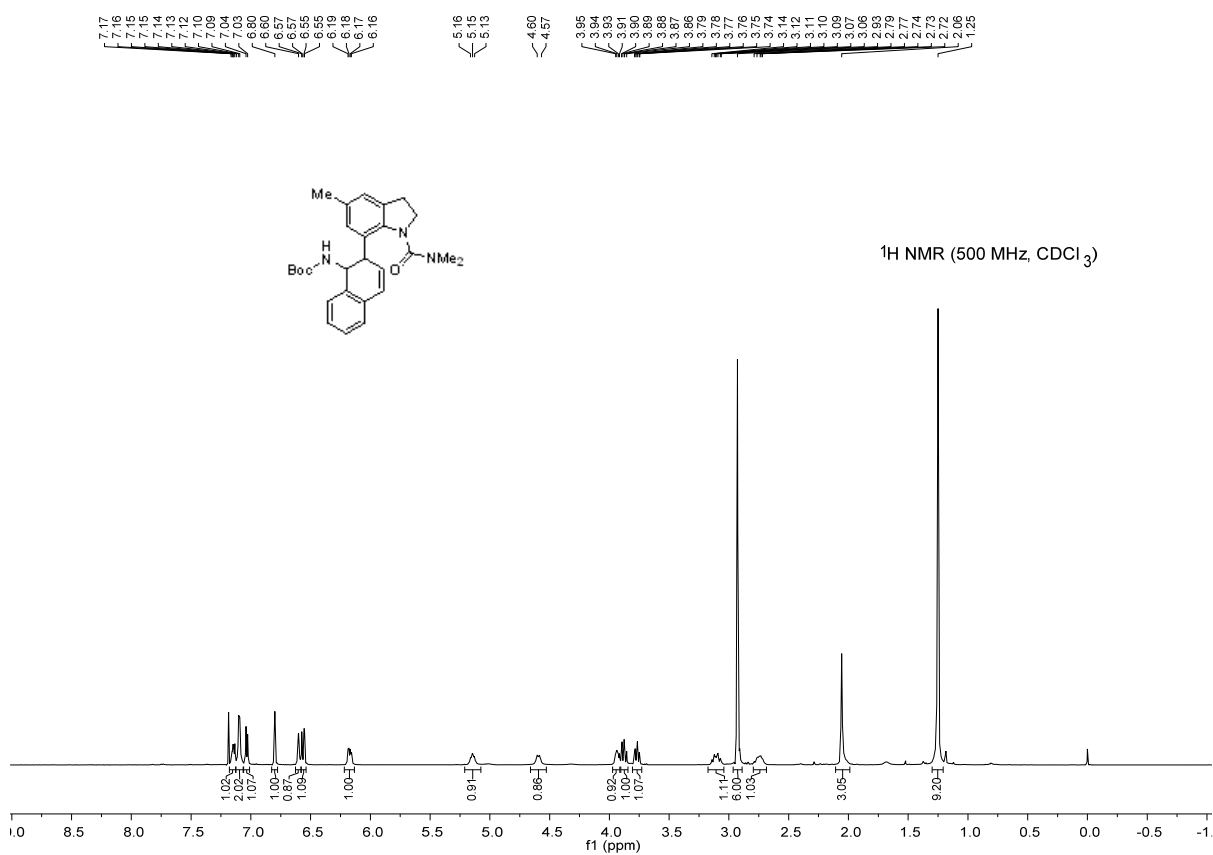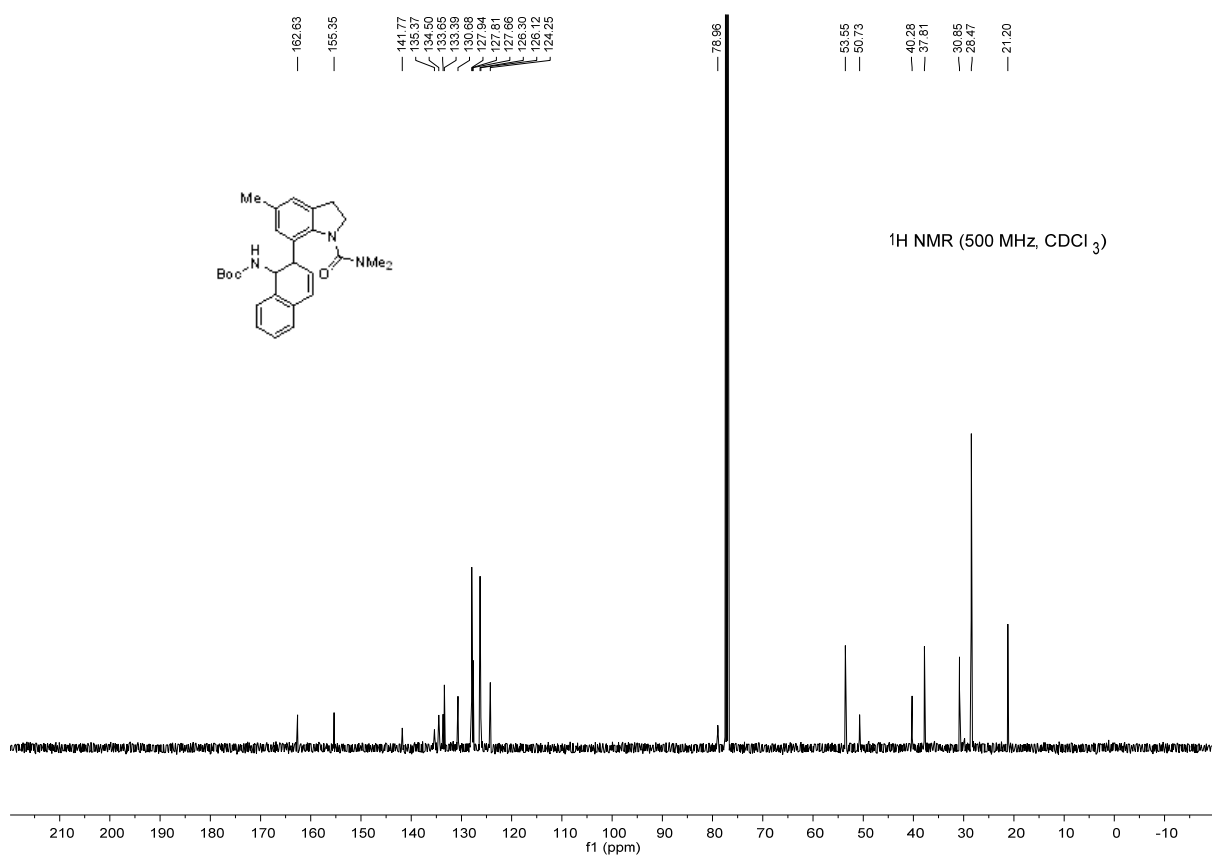

(24) *tert*-butyl (2-(1-(dimethylcarbamoyl)-5-methoxyindolin-7-yl)-1,2-dihydronaphthalen-1-yl)carbamate  
**(5c)**

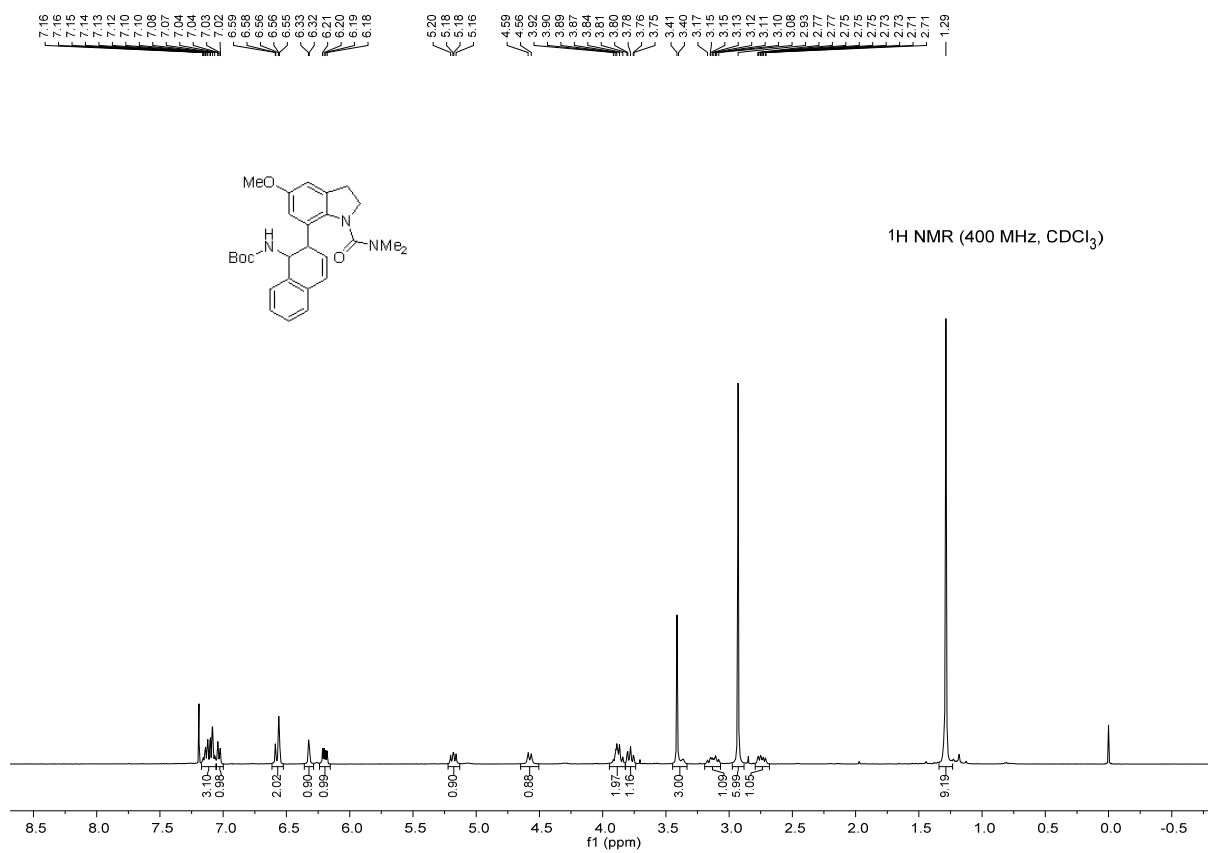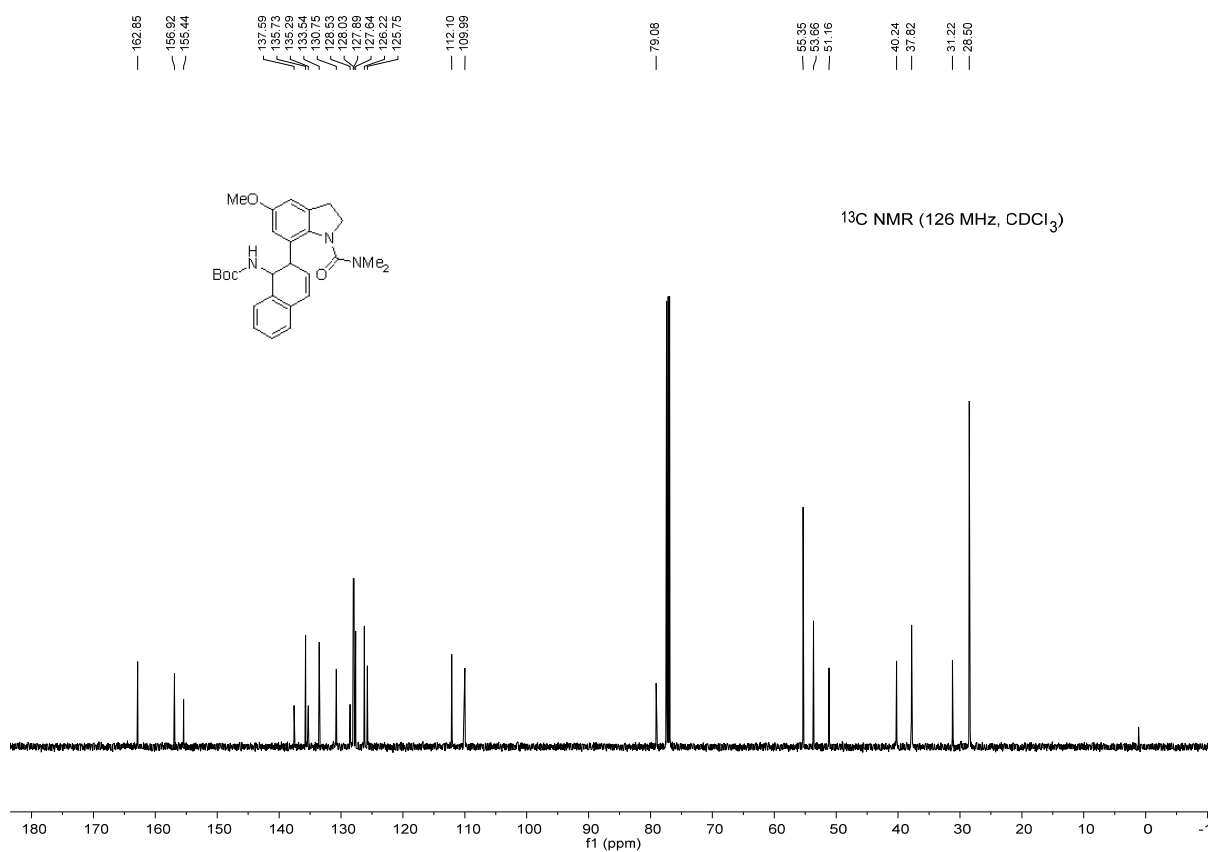

(25) *tert*-butyl (2-(5-(benzyloxy)-1-(dimethylcarbamoyl)indolin-7-yl)-1,2-dihydronaphthalen-1-yl)carbamate (**5d**)

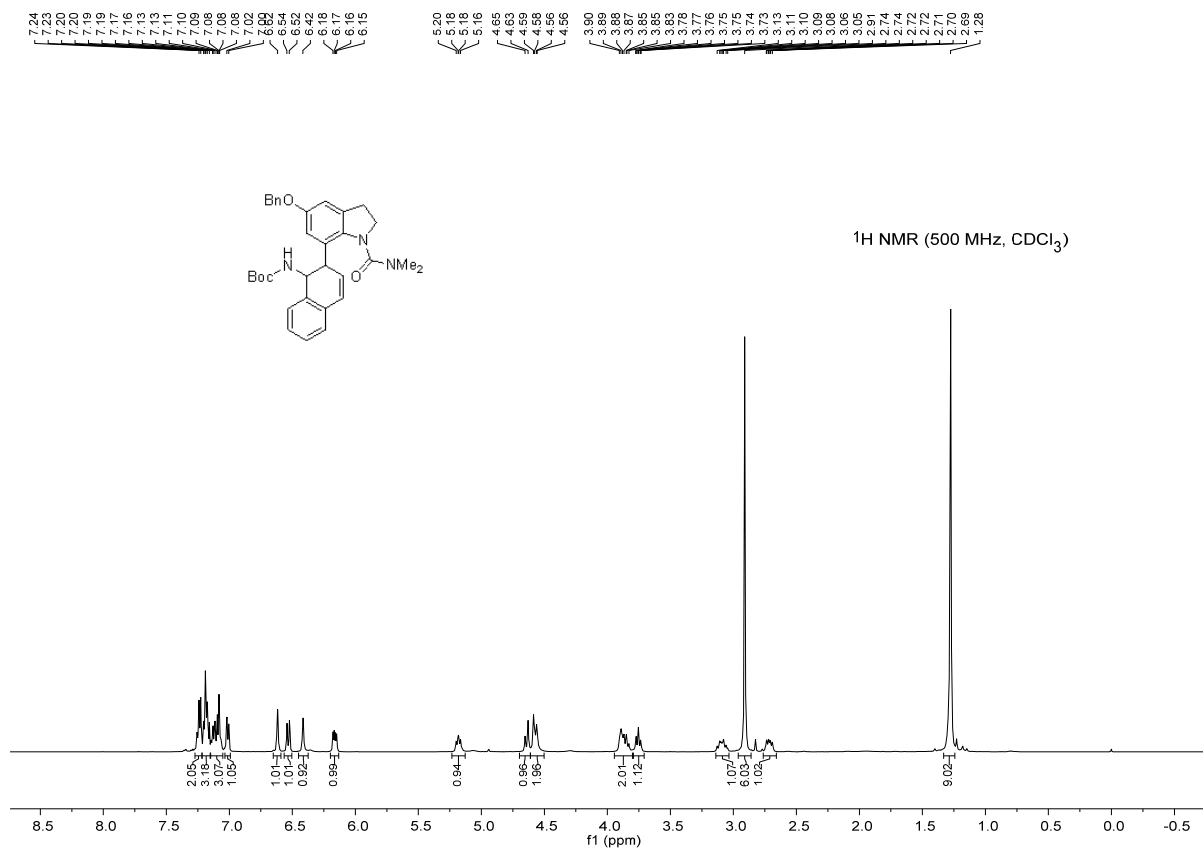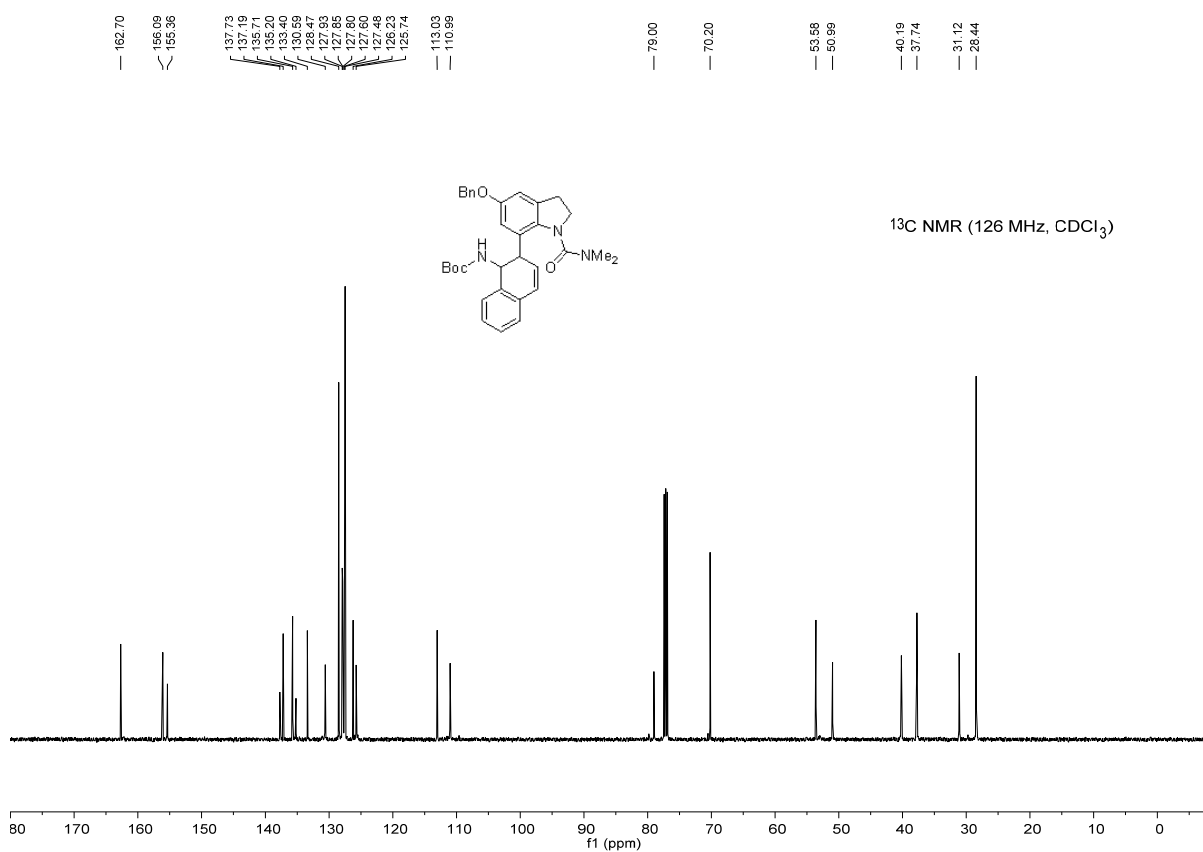

(26) *tert*-butyl (2-(1-(dimethylcarbamoyl)-5-fluoroindolin-7-yl)-1,2-dihydronaphthalen-1-yl)carbamate  
**(5e)**

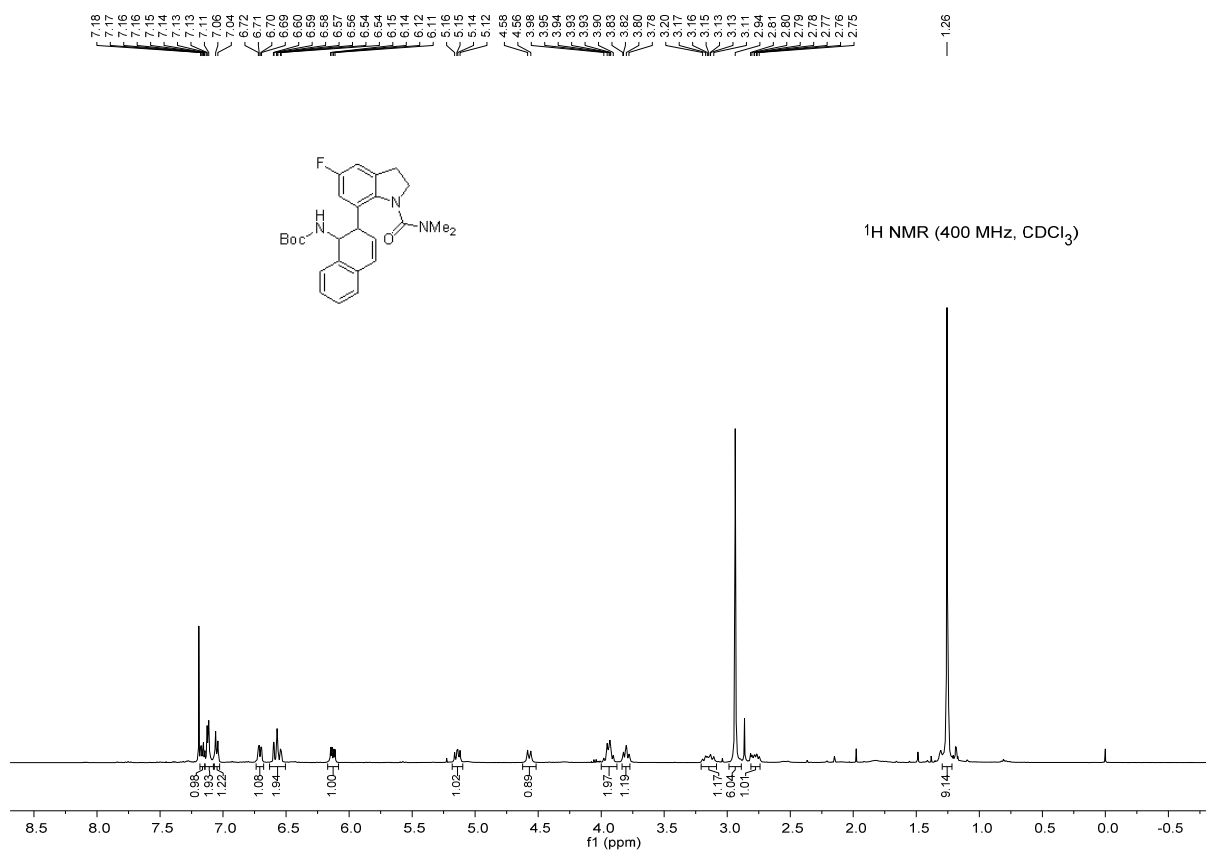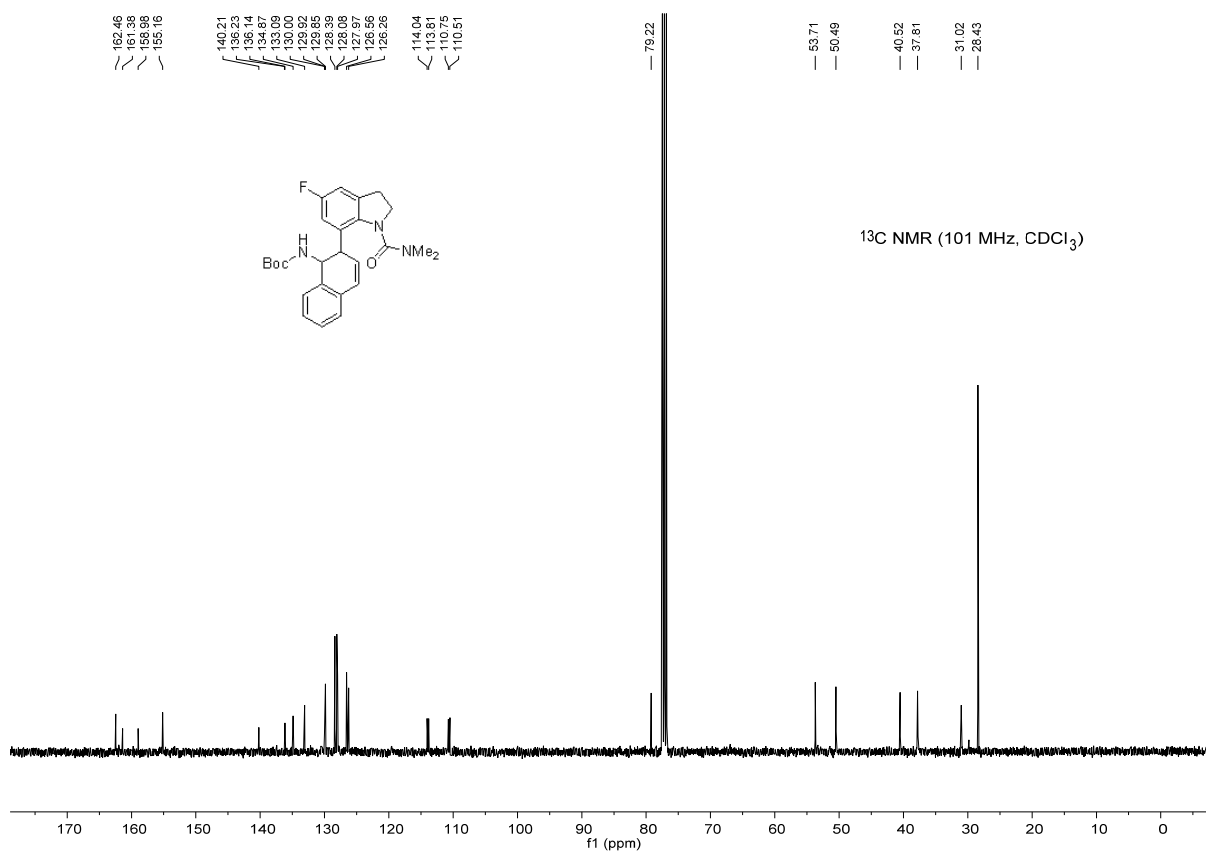

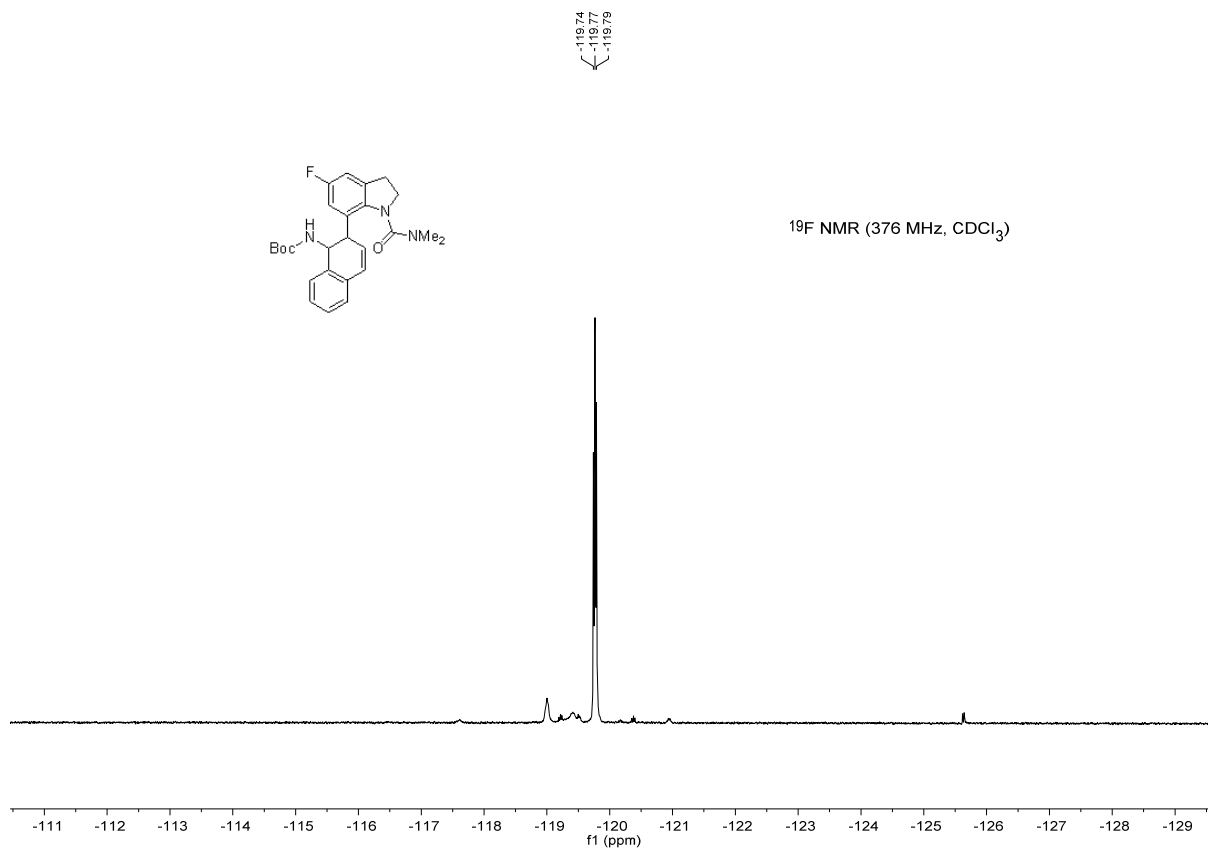

(27) *tert*-butyl (2-(5-chloro-1-(dimethylcarbamoyl)indolin-7-yl)-1,2-dihydronaphthalen-1-yl)carbamate  
**(5f)**

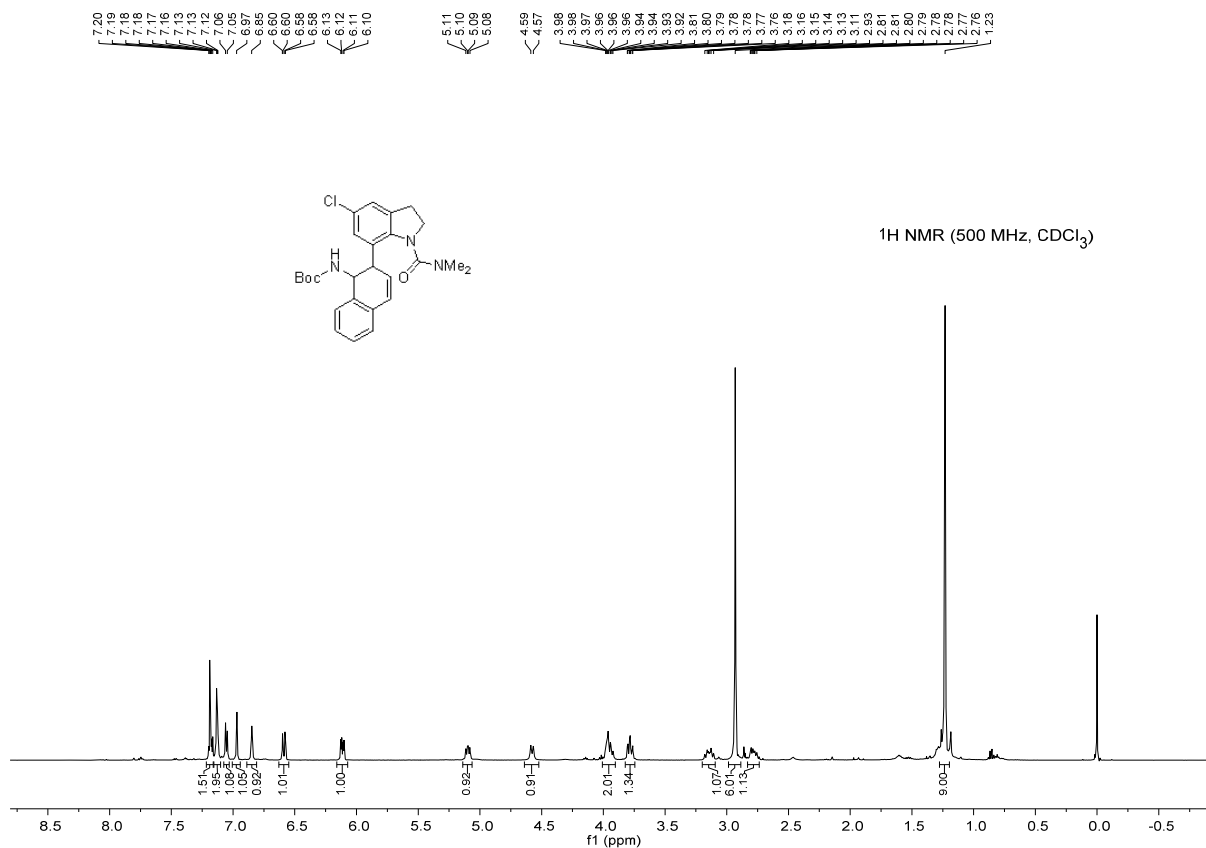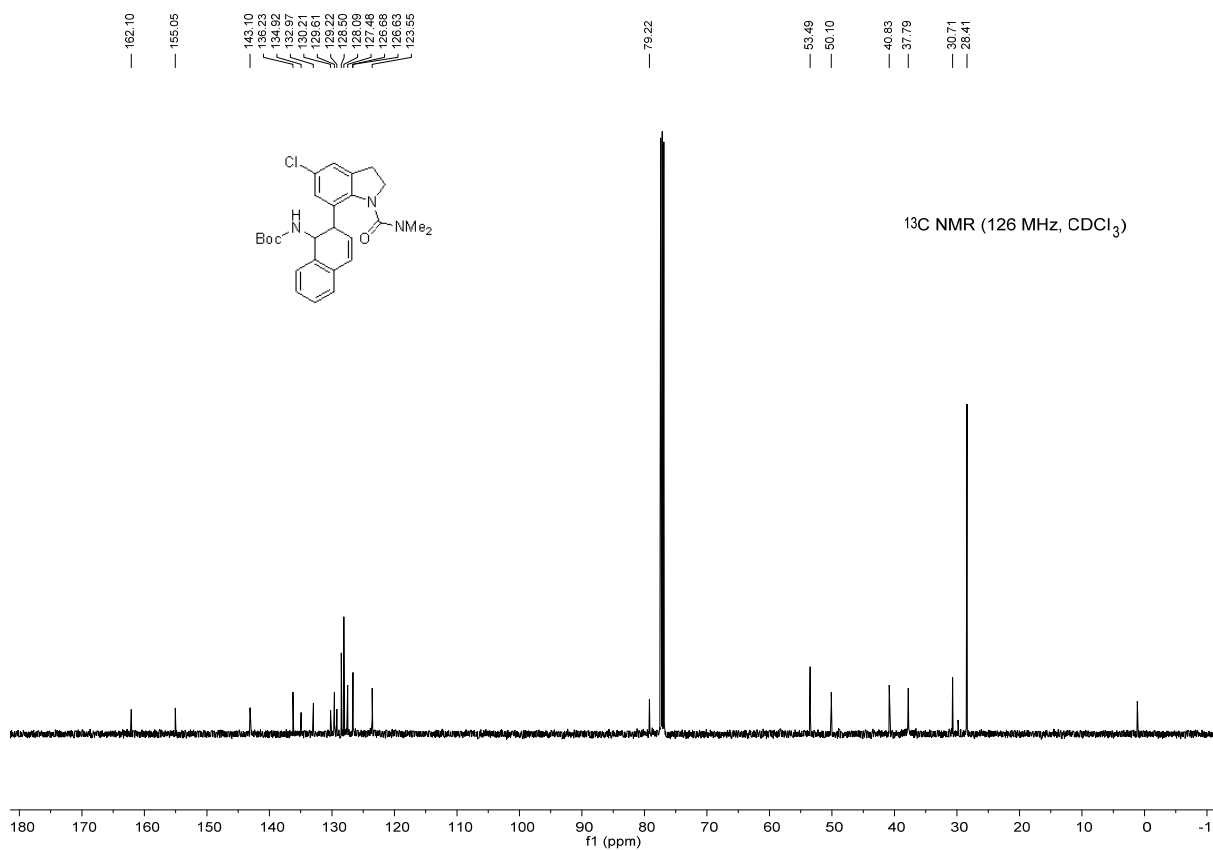

(28) *tert*-butyl (2-(5-bromo-1-(dimethylcarbamoyl)indolin-7-yl)-1,2-dihydronaphthalen-1-yl)carbamate

(5g)

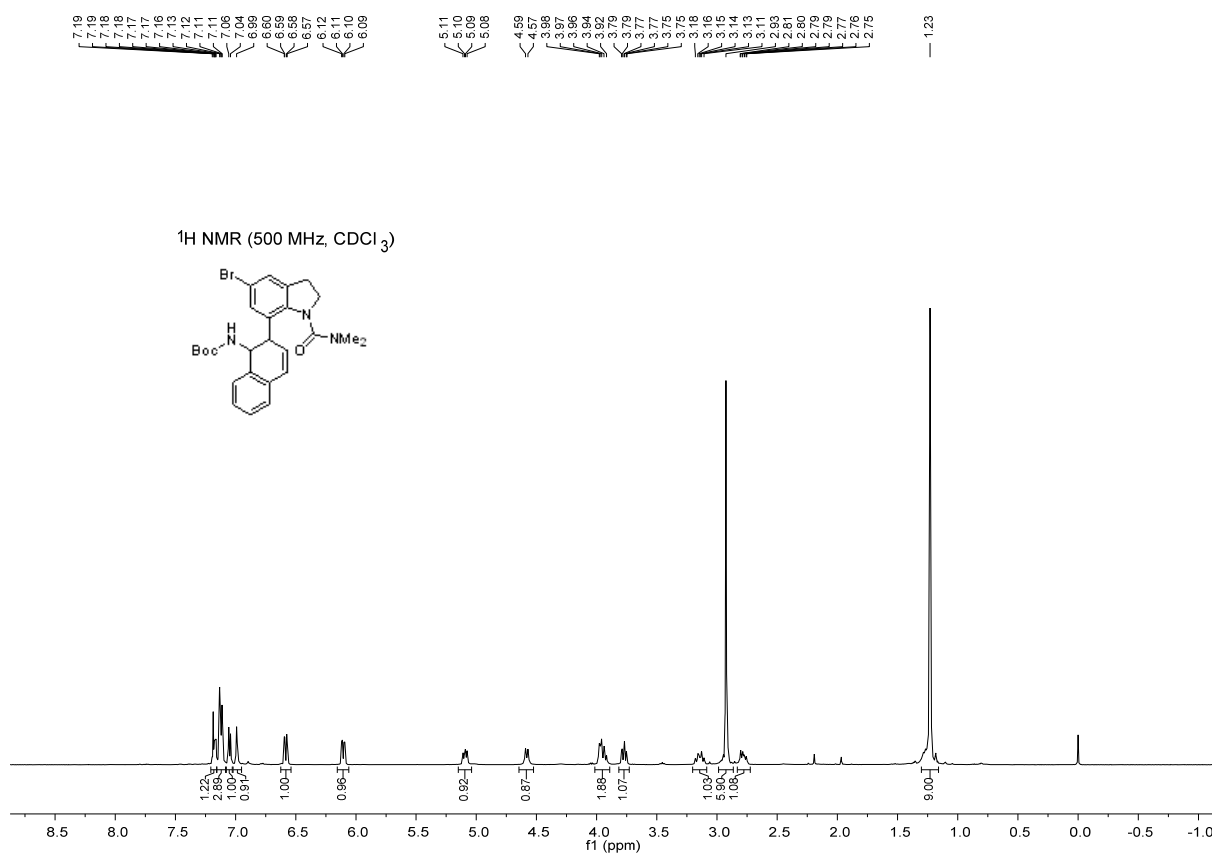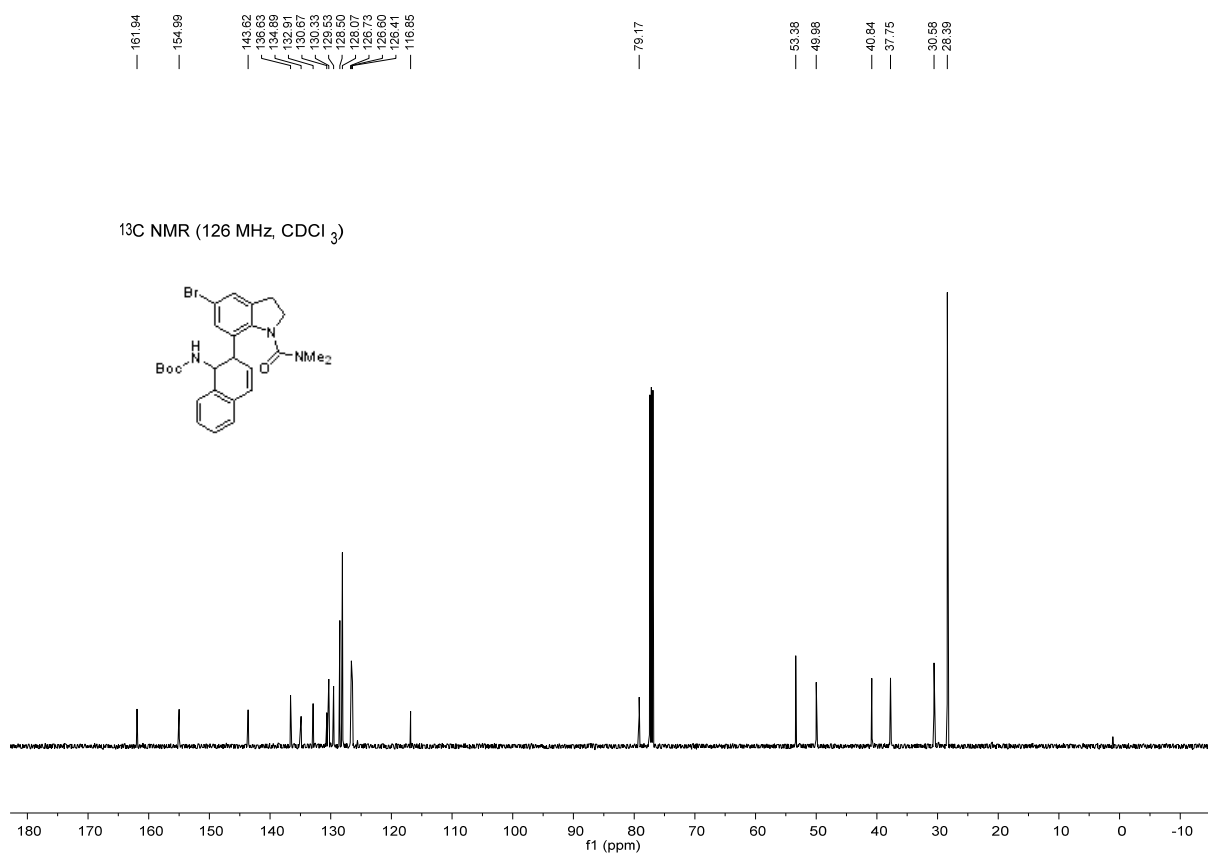

(29) *tert*-butyl (2-(4-bromo-1-(dimethylcarbamoyl)indolin-7-yl)-1,2-dihydronaphthalen-1-yl)carbamate

(5h)

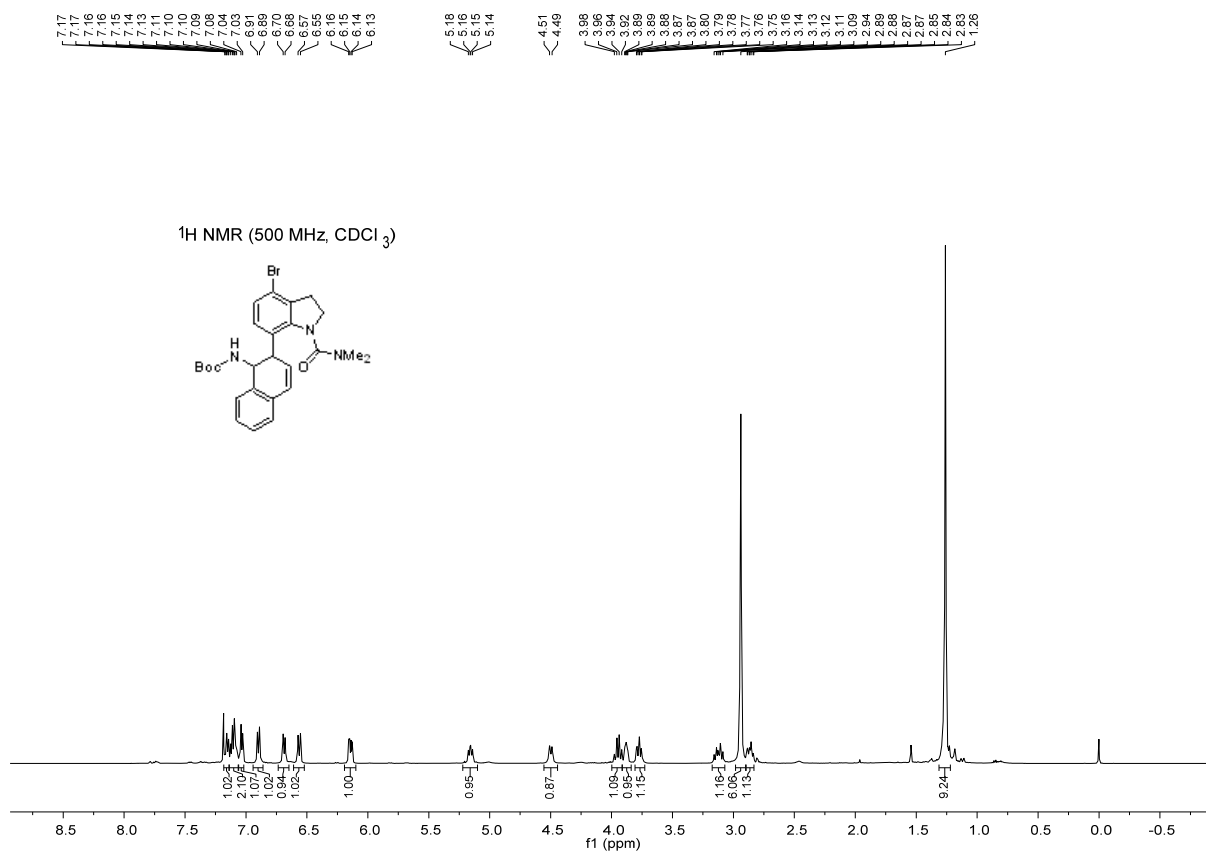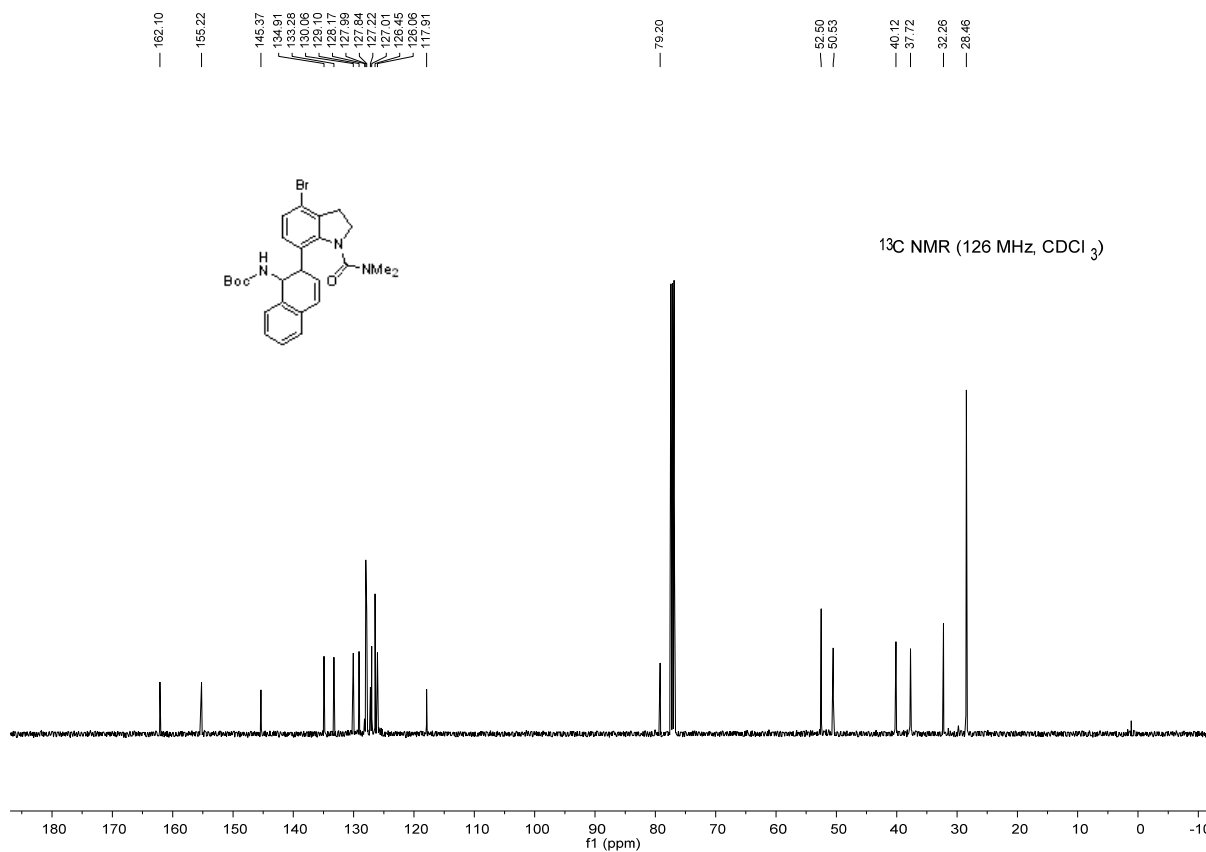



(30) *tert*-butyl (2-(1-(ethyl(methyl)carbamoyl)indolin-7-yl)-1,2-dihydronaphthalen-1-yl)carbamate (**5i**)

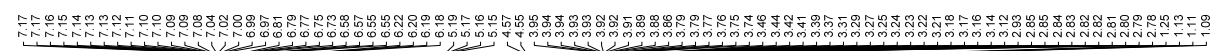

<sup>1</sup>H NMR (400 MHz, CDCl<sub>3</sub>)

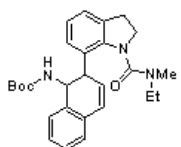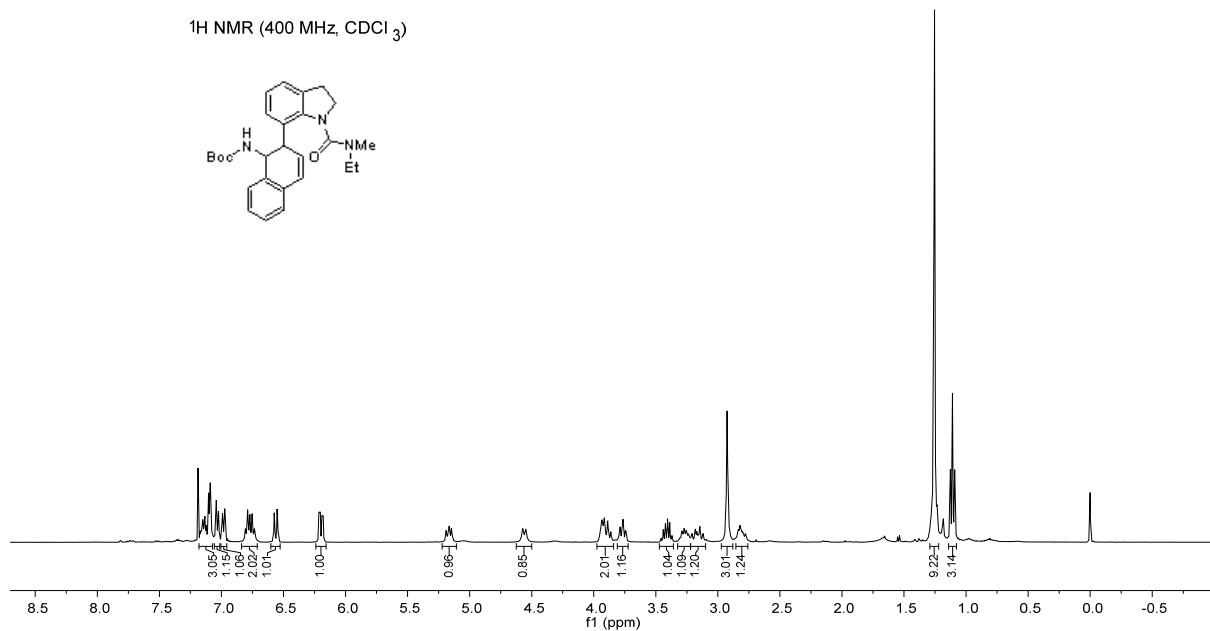

<sup>13</sup>C NMR (101 MHz, CDCl<sub>3</sub>)

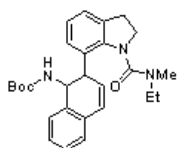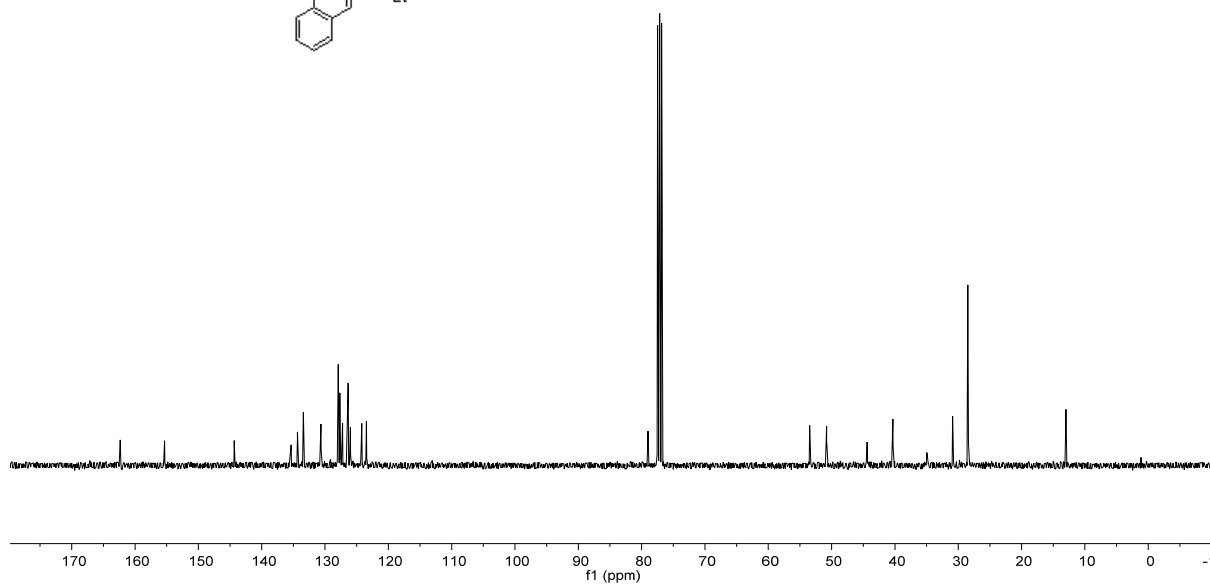

(31) *tert*-butyl (2-(1-(dimethylcarbamoyl)indolin-7-yl)-6,7-difluoro-1,2-dihydronaphthalen-1-yl)carbamate  
**(5j)**

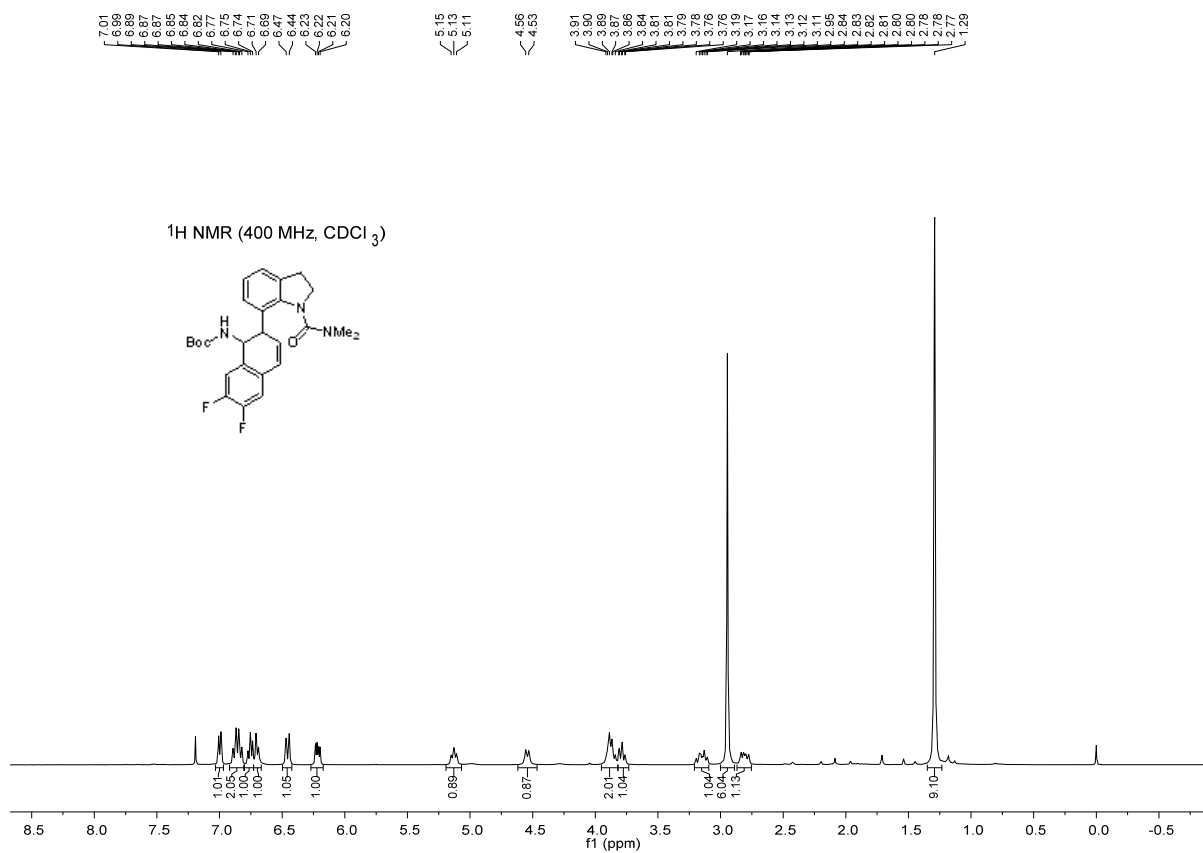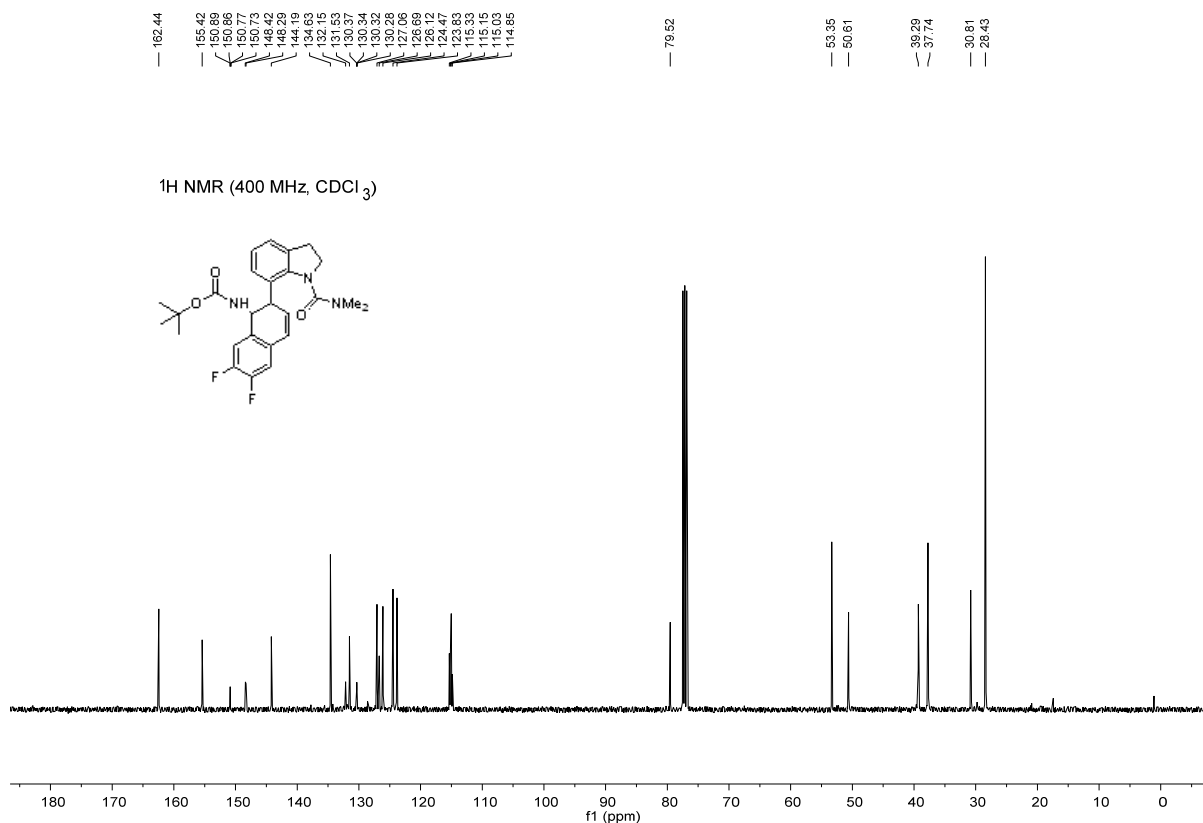

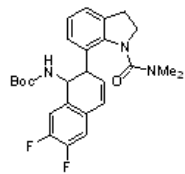

$^{19}\text{F}$  NMR (471 MHz,  $\text{CDCl}_3$ )

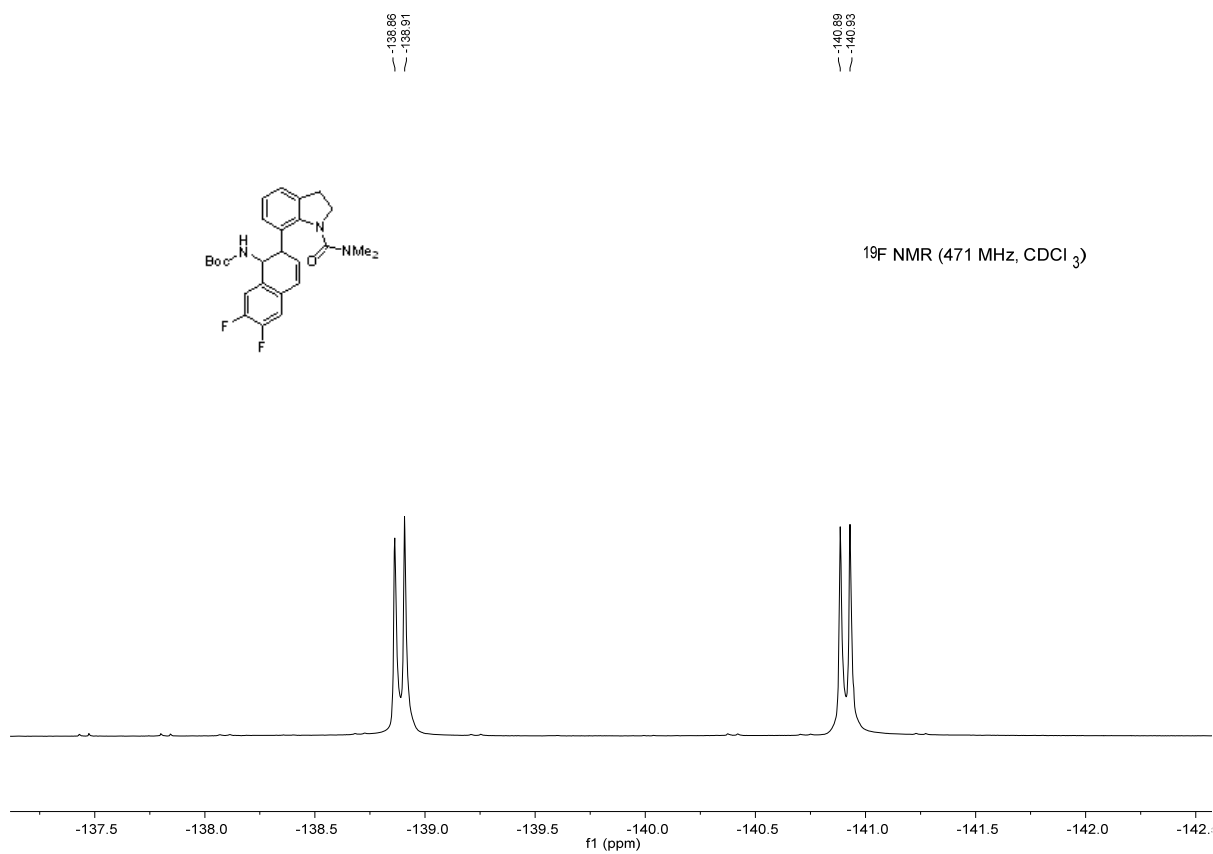

(32) 7-(6,7-dimethoxynaphthalen-2-yl)-N,N-dimethylindoline-1-carboxamide (**5k**)

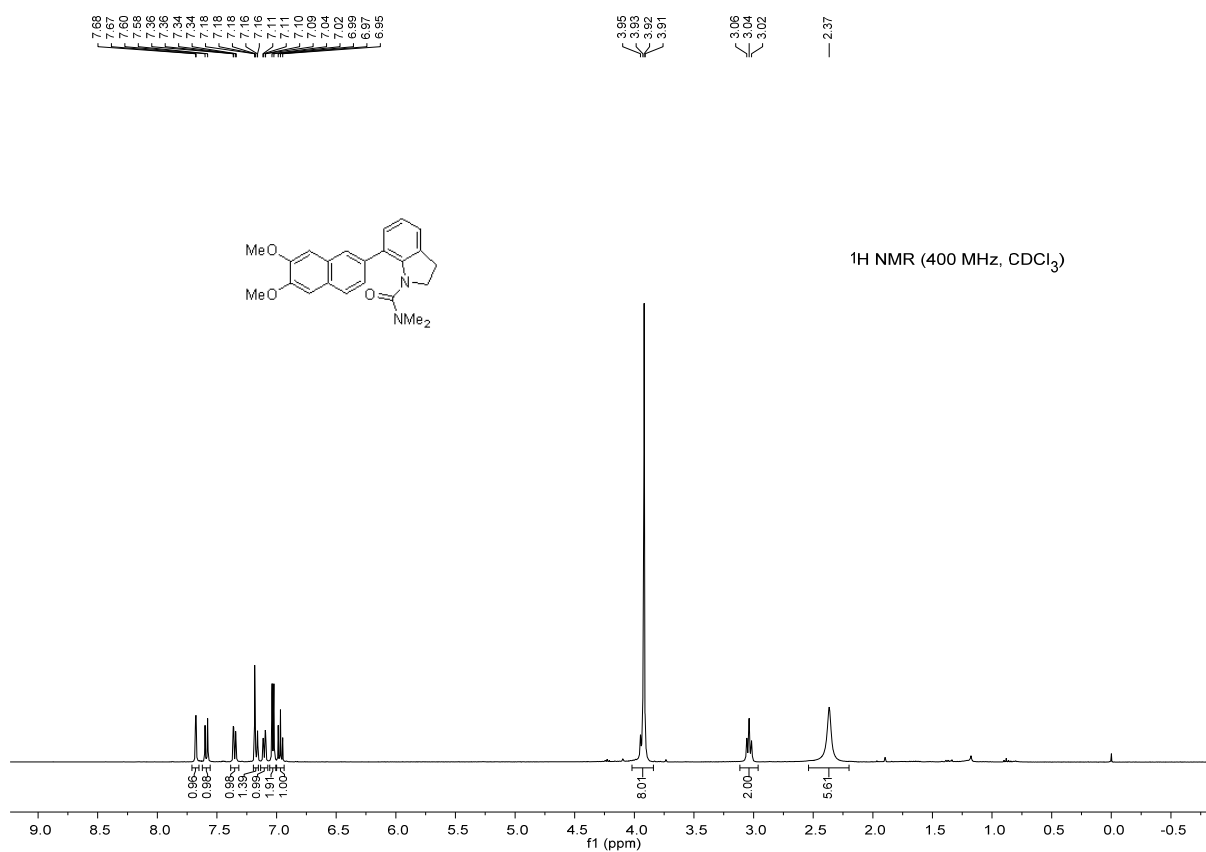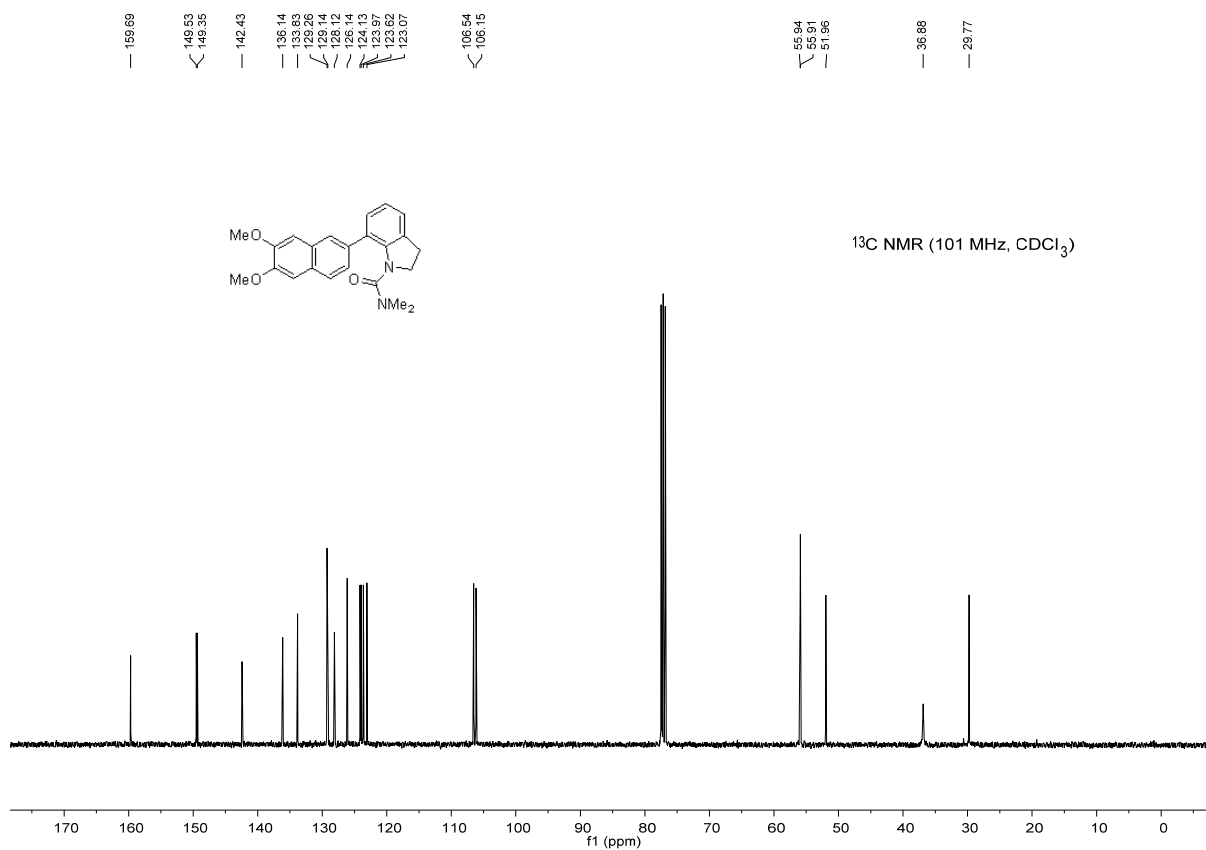

(33) 7-(7-methoxynaphthalen-2-yl)-N,N-dimethylindoline-1-carboxamide (**51**)

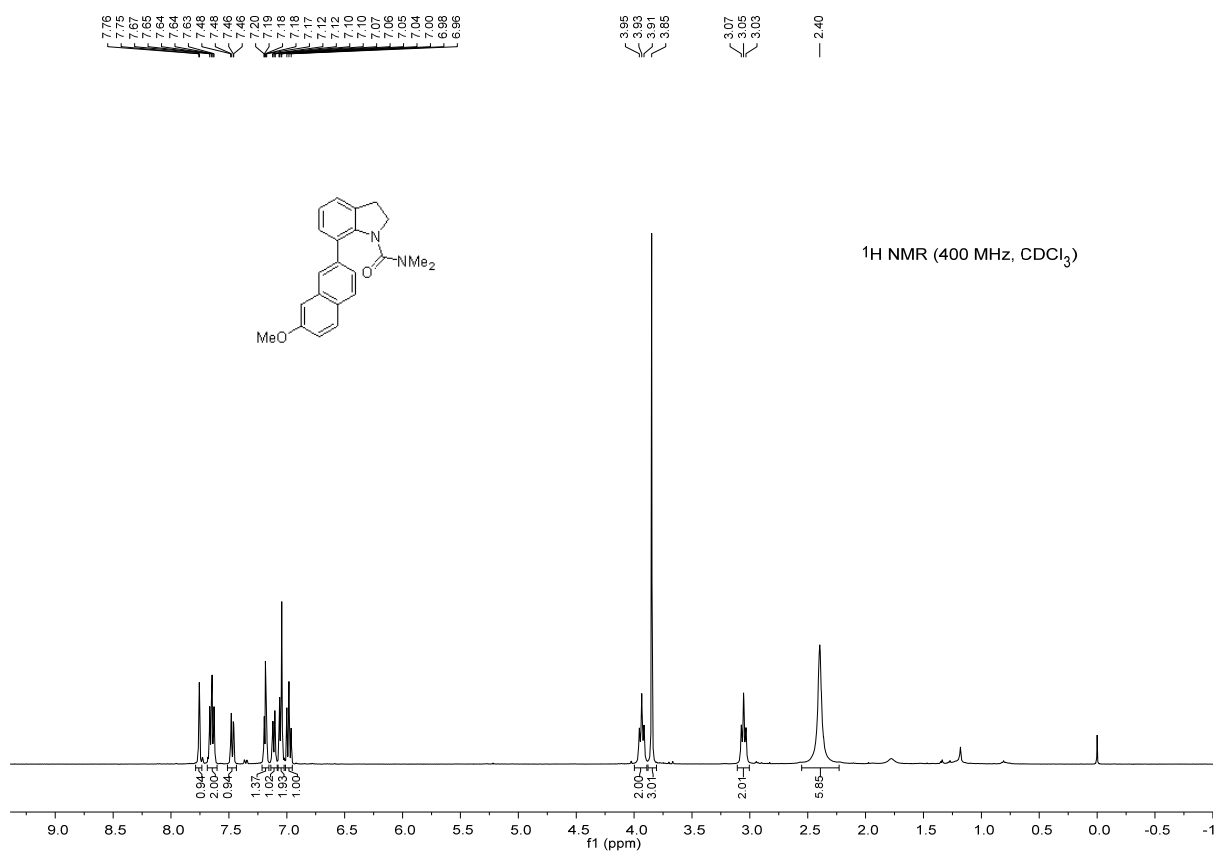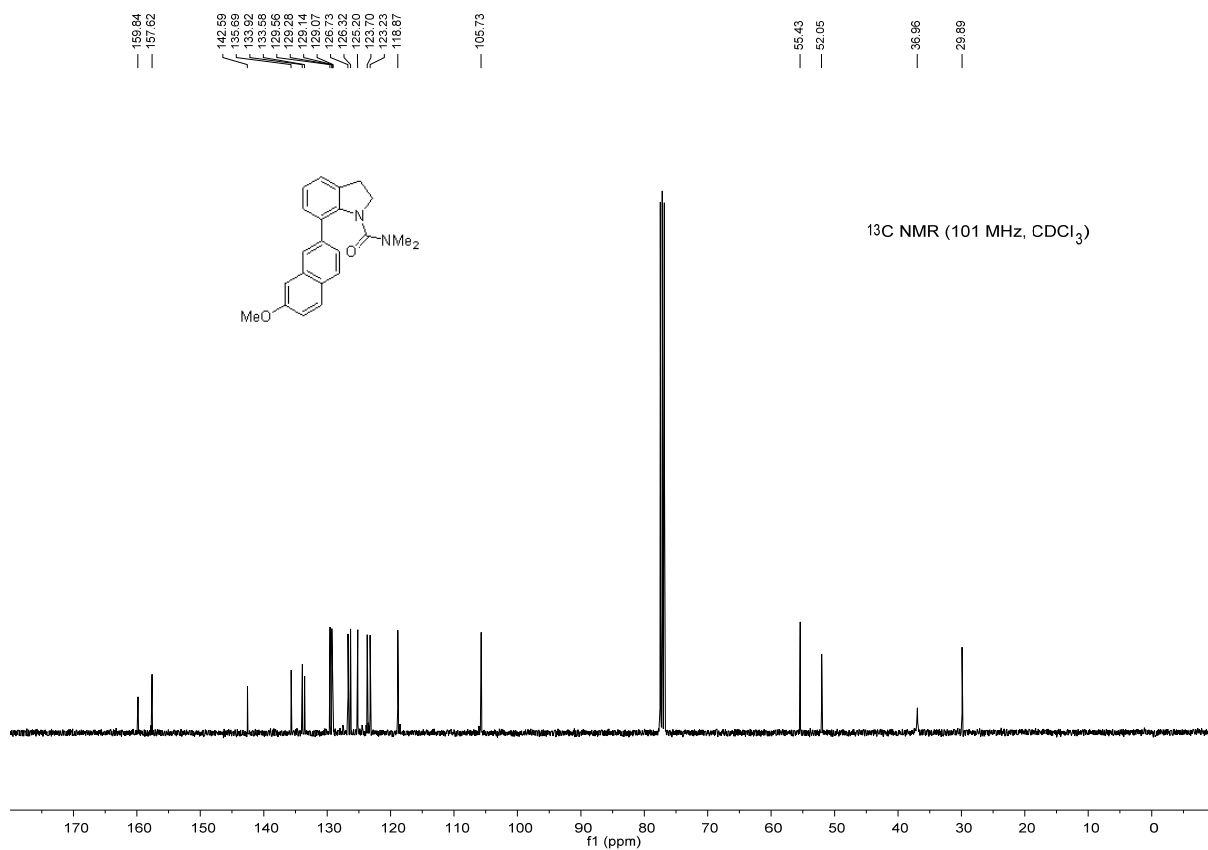

# NMR spectral copies of compound 6 (through reaction of 3a with KOH)

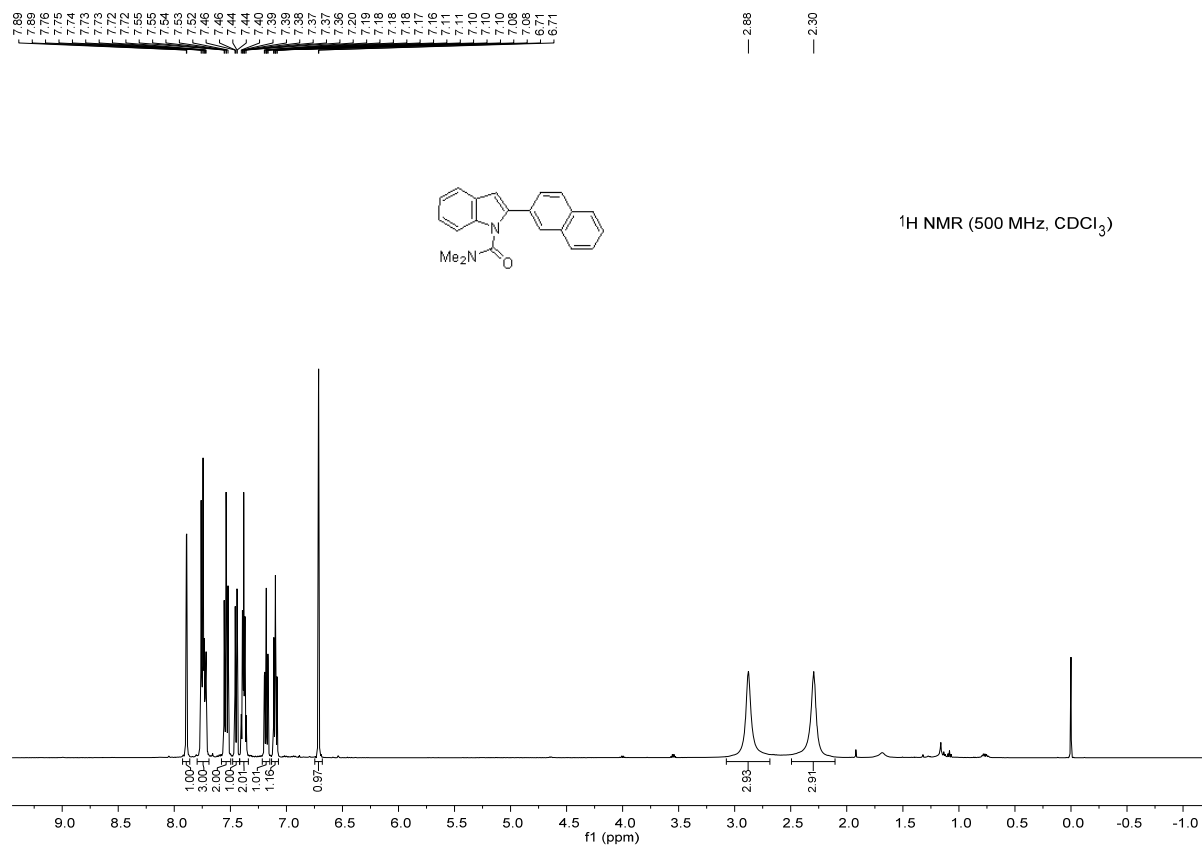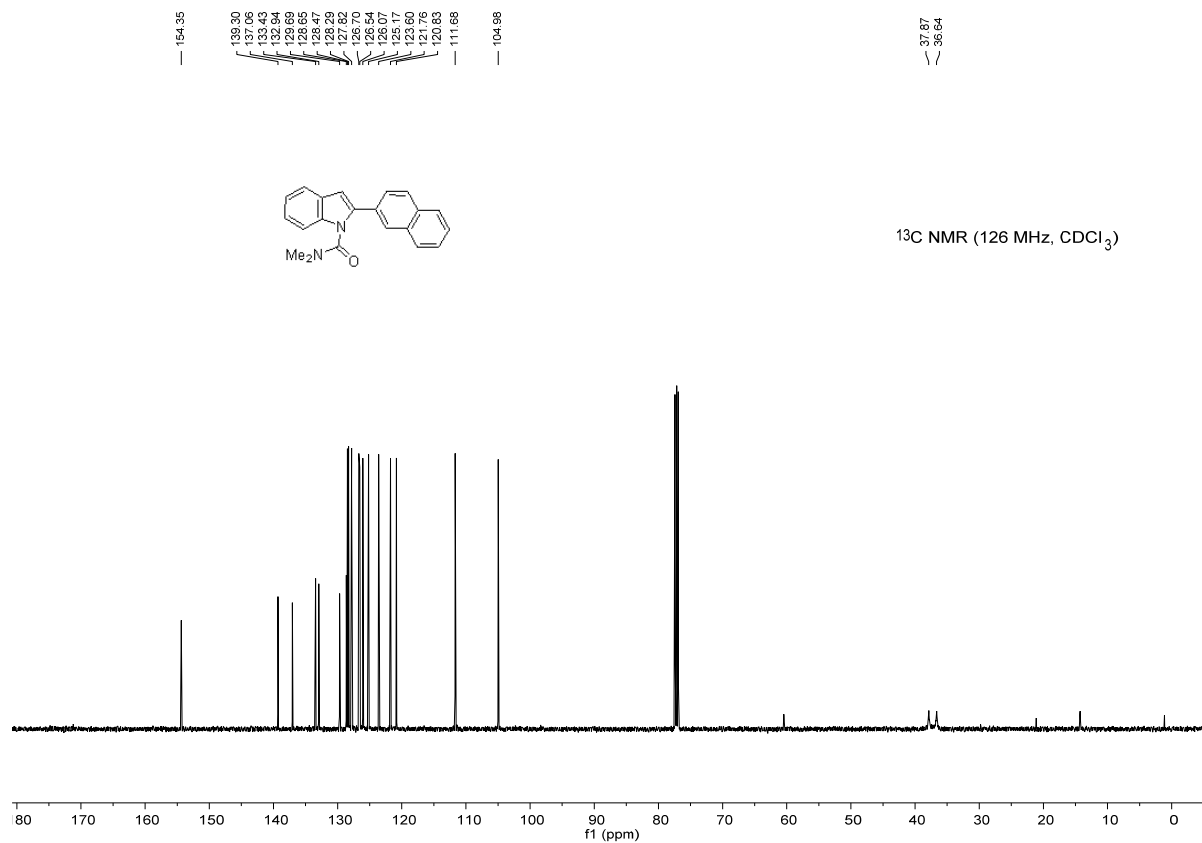



## Kinetic Isotope Effect (KIE) experiment

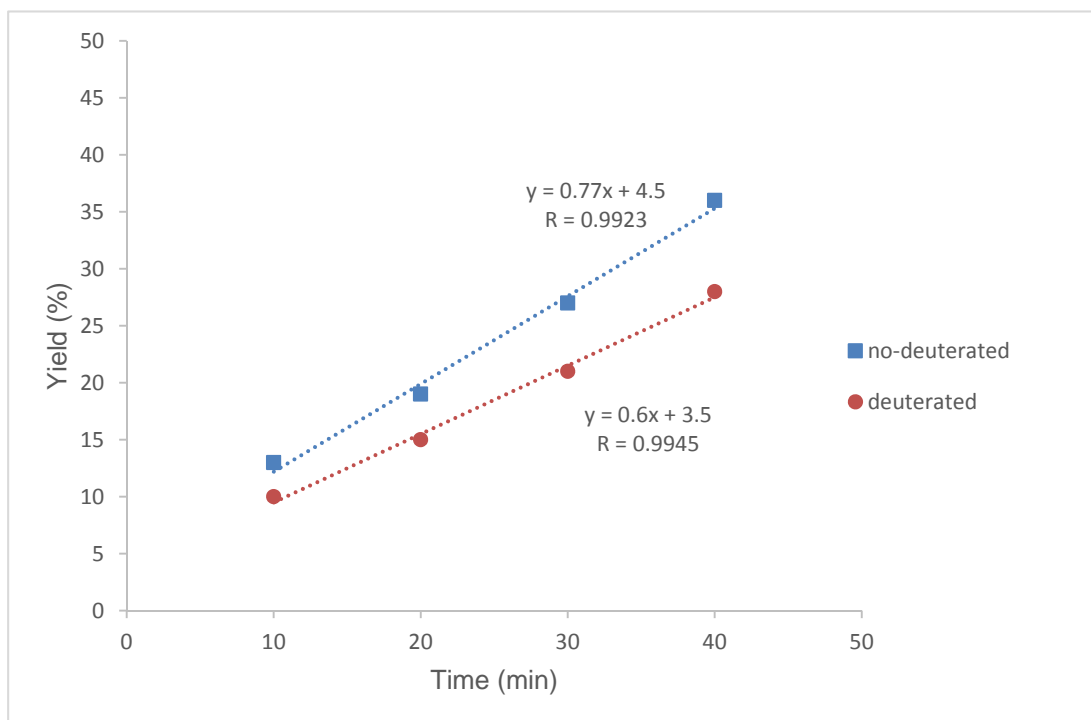



# HRMS copy of intermediate I

20240122HESI+cjz-14 #21 RT: 0.30 AV: 1 NL: 4.88E6  
T: FTMS + c ESI Full ms [200.00-800.00]

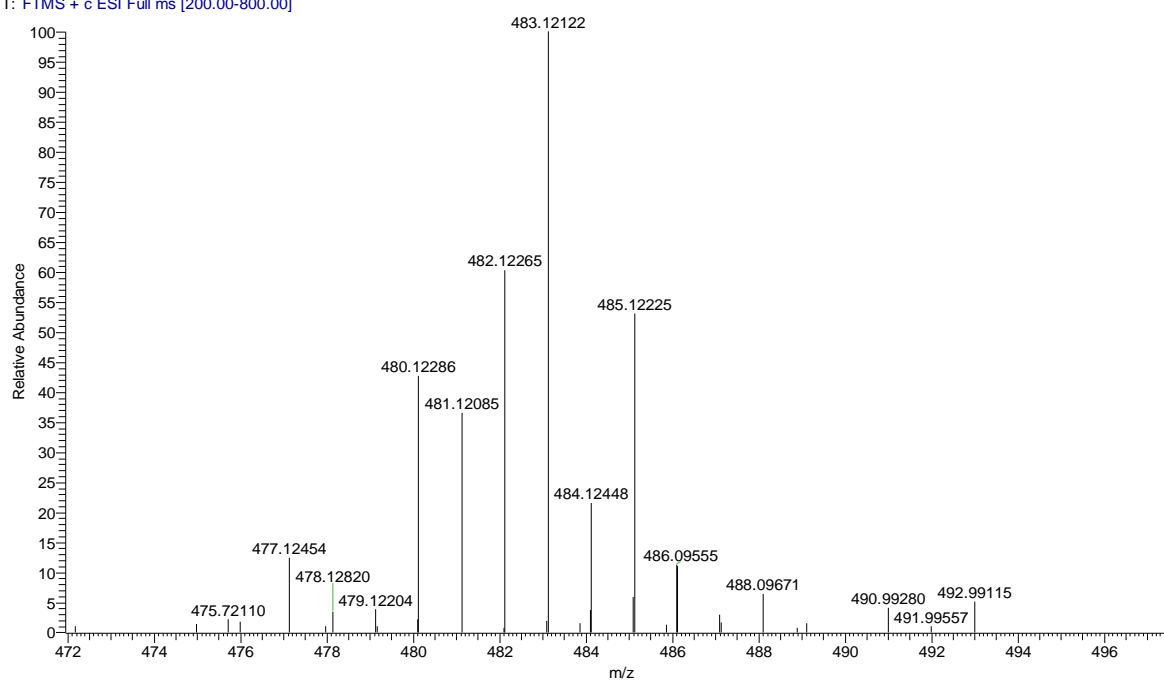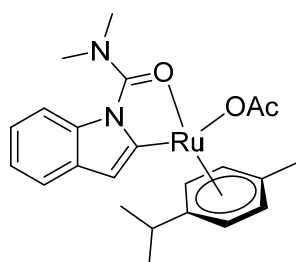

Supplement: d4ob00678j1.pdf [file d4ob00678j1.pdf]
